# Supplementary material for: Integrated single-cell genetic and transcriptional analysis suggests novel drivers of chronic lymphocytic leukemia
Source: HighWire-hosted journal article supplement (doi:10.1101/gr.217331.116), 2017-07-05
Supplement: Supplemental_Methods.docx [file Supplemental_Methods.docx]

**FISH cytogenetics and karyotyping**

Peripheral blood samples were cultured for 3 days in the presence of CpG-ODN according to procedures from the clinical cytogenetic laboratory at the Brigham Women’s Hospital, Boston, MA. For karyotype analysis, cells were treated with hypotonic solution, fixed in methanol/acetic acid (3:1) and dropped on glass slides. Chromosome spreads were G-banded by trypsin treatment and Giemsa stain. Karyotype analysis in CLL005 was performed on 20 metaphase cells for each case. For all FISH analysis, cytogenetic slides were incubated in 2×SSC at 37°C for 30 min, dehydrated, and hybridized with 10 μl labeled DNA probes in a humidified oven overnight. After washing, slides were counter-stained with DAPI and analyzed under a fluorescence microscope. Interphase FISH in CLL005 was performed with the CLL panel that includes LSI p53/LSI ATM and LSI D13S319/LSI 13q34/CEP 12 Multi-color Probe Sets and the CCND1/IGH Dual Fusion Dual Translocation Probe (Abbott Molecular/Vysis, Inc.). FISH analysis in CLL003 and CLL146 was performed using a combination of commercial probes and custom-labeled probes. Probes for 11q23/13q14 (CLL003) and 17p13 (CLL146) were purchased from Kreatech Diagnostics (Buffalo Grove, IL). Custom-labeled probes for 6p and 18p (CLL146) were prepared from locus-specific BAC clones RP11-39C2 and RP11-106J7 (CHORI, Oakland, CA). BAC DNA was isolated (Large-Construct Kit, Qiagen, Germantown, MD), and 100 ng DNA was labeled with Orange-552-dUTP or Fluorescein-12-dUTP at 37ºC overnight using a BIO-PROBE® random primed kit (ENZO, Farmingdale, NY). Labeled DNA was ethanol co-precipitated with 500ng Cot-1 DNA and 1mg glycogen (Invitrogen, Carlsbad, CA). The DNA pellet was dissolved in a solution containing 50% formamide, 10% dextran sulfate, and 2×SSC. For interphase FISH analysis, 100 nuclei were scored for each case, and subclones were grouped according to hybridization signal patterns.

**Analysis of clonal heterogeneity by single-cell targeted DNA sequencing**

***A. Evaluation of target enrichment***

PCR primers were designed for two types of targets: (1) heterozygous sites in regions inferred to have undergone loss-of-heterozygosity from bulk whole-exome sequencing; and (2) sites of somatic single-nucleotide variants. We first evaluated the performance of each primer pair and excluded targets that were consistently poorly amplified in a majority of cells.

A total of 991 cells were amplified and sequenced: 192 cells for CW011, 250 cells for CW014, 208 cells for CW084, 182 cells for CW106, and159 cells for CW236. We genotyped each cell at all 201 target sites by UnifiedGenotyper from GATK (https://software.broadinstitute.org/gatk/gatkdocs/org_broadinstitute_gatk_tools_walkers_genotyper_UnifiedGenotyper.php). The average of the mean coverage in all cells at each target site was 48.7; the median of the mean coverage in all cells at each target site was 38.2. We considered a given target site to be covered in a single-cell genome if at least three purity-filtered reads (default setting in GATK) were observed. We excluded sites that were covered in fewer than 100 cells (~10% of all samples) or had a mean depth-of-coverage lower than 4x. A total of 35 sites were excluded. The final analytical results were insensitive to these permissive thresholds (100 cells covered at 3x, mean depth at least 4x). For example, if we had chosen to include only sites that were covered in 50 or more cells by at least 2 reads and having a mean depth of at least 2x, there would still be 30 sites that were excluded.

***B. Evaluation of single-cell libraries***

We then assessed the quality of each single-cell targeted sequencing library. There were two rounds of amplifications prior to library construction:multi-strand displacement amplification of the whole genome and target enrichment by PCR. Each amplification step might generate amplification errors and/or allelic distortion or allelic dropout, causing technical variability between different cells. The multiplexed sequencing of many single-cell libraries also resulted in uneven sequencing depths in the cells. Instead of trying to model these variations, we sought to assess the quality of each single-cell targeted sequencing library based on the sequence coverage at clonal heterozygous or homozygous sites. For each cell, the sequence coverage at homozygous sites was used to assess the frequency of amplification or sequencing errors, and the sequence coverage at heterozygous sites was used to assess the degree of allelic distortion or dropout.

*Single-cell genotyping*

We first inferred the single-cell genotypes based on the counts of sequencing reads supporting reference or alternate alleles. Reference or alternate alleles were considered to be present in a given cell if there were at least two sequencing reads supporting this allele (to eliminate sequencing errors at 0.1-1% frequency) and the allele frequency was at least 2% (to control amplification errors). The heuristic thresholds were chosen to maximize the sensitivity to detect a minor allele in a single-cell genome but might lead to false heterozygosity calls (see below). A site was considered to be clonally homozygous if the minor allele was observed in at most 5% of all cells (~10 cells); a site was considered to be clonally heterozygous if the minor allele and the major allele were observed in roughly equal numbers of cells (symmetric binomial test, *p*>=0.1) and the combined number of cells showing either or both alleles was at least 100. For calling heterozygous sites, the stringent thresholds (*N*=100 total supports for the minor and the major alleles, *p*>=0.1) were chosen to compensate for the permissiveness in calling a minor in single cells, i.e., “false heterozygosity” due to amplification/sequencing errors. For calling homozygous sites, the 5% allelic frequency roughly corresponded to the fraction of poorly amplified single-cell libraries. Such libraries contributed a majority of false variant calls. Generally, the threshold for calling a given allele in a single cell genome is determined by the average frequency of error reads (due to either amplification or sequencing), and the threshold for calling a clonal genotype is determined by the rate of poor DNA amplification. These two parameters can vary between different protocols and should be validated *a posteriori* after poor libraries are excluded.

*Assessment of amplification errors*

We used the set of clonal homozygous sites to estimate the error read frequency at each site and the fraction of sites with a high error read frequency. For each cell, we calculated the total number of homozygous sites that were covered by at least 10 reads (“total sites”) and counted the number of reads showing concordant or discordant bases at each covered site. We regarded a given site as an “error site” if there were at least three reads showing the discordant base and the error read frequency exceeded 5%. The same threshold (5% allelic frequency, > 2 supporting reads, 10 total reads) was later used to call somatic mutations. Because somatic mutations were often subclonal and did not have support from most cells, we used this more stringent threshold to control for false positive somatic variant detection in a single cell than the threshold that had been applied to determine clonal heterozygous or homozygous sites (2% allelic frequency, > 1 supporting read). We calculated the number and the fraction of error sites as well as the mean frequency of error reads across all covered sites. We then excluded cells that covered < 20% of all homozygous sites, having 1% or higher average error read frequency, or showing a high error read frequency in 5% or more covered sites.

*Assessment of allelic amplification bias*

We used the set of clonal heterozygous sites to estimate variant detection sensitivity and allelic imbalance. For each cell, we calculated the total number of heterozygous sites that were covered by at least 10 reads (“total sites”) and excluded cells that covered < 20% of all heterozygous sites. We expected substantial allelic distortion, i.e., the sequence coverage at heterozygous sites predominantly reflecting one allele, as the genomic DNA from each cell underwent two rounds of amplification. To estimate the detection sensitivity for heterozygous somatic mutations in each cell, we calculated the fraction of clonal heterozygous sites where the minor allele had three or more supporting reads and the minor allele frequency was above 5%. The mean estimated detection sensitivity was about 50%. Even though allelic distortion compromises variant detection sensitivity, it only modestly affects the power to detect loss-of-heterozygosity as long as a sufficient number of heterozygous sites are covered. We thus did not exclude cells based on the detection sensitivity as long as allelic distortion was random. We calculated the numbers of sites where the major allele corresponded to the reference allele or the alternate allele. If allelic distortion is symmetric between homologous chromosomes, these two counts should be roughly equal([Zhang et al. 2015](#_ENREF_5)). We excluded cells where these counts were significantly different (symmetric binomial test, *p*<0.05).

***C. Detection of somatic mutations in single cells***

We considered a single cell to harbor a somatic mutation if the variant allele frequency was above 5% and had three or more supporting reads. We estimated the false positive detection rate at this threshold from the sequence coverage at clonal homozygous sites; cells with more than 5% false positive rate were excluded. We further estimated the detection sensitivity at this threshold from the sequence coverage at clonal heterozygous sites. After excluding poorly amplified cells, we had the following cell counts for each sample: 155 (out of 192) for CLL003 (mean detection sensitivity 47%), 219 (out of 250) for CLL005 (mean detection sensitivity 58%), 163 (out of 208) for CLL032 (mean detection sensitivity 44%), 146 (out of 182) for CLL096 (mean detection sensitivity 32%), 140 (out of 159) for CLL146 (mean detection sensitivity 54%).

We recognized that the allele frequency threshold became inadequate at sites of low sequencing depths. When there were fewer than 10 reads covering a variant site, the mutant allele was called only if there were three or more reads supporting the mutant allele but two or fewer reads supporting the reference allele.

***D. Detection of loss-of-heterozygosity in single cells***

In order to detect loss-of-heterozygosity (LOH) in single cells, we first determined the haplotype (the collection of genotypes at heterozygous sites in each homologous chromosome) of the deleted chromosome and of the retained chromosome, and then calculated the average sequence coverage of each haplotype. There should be no sequence coverage of the deleted haplotype in cells with LOH, whereas similar coverage should be observed in cells with heterozygosity. The deleted-to-retained haplotype ratio thus provides a digital readout of loss-of-heterozygosity.

We first validated the regions of LOH by calculating the number of cells supporting the reference or the alternate base. The same threshold (5% allele frequency, 3 or more reads) was used to determine if a given cell contained either allele. If there were no LOH, the total number of reference bases and the total number of alternate bases in all the cells should be roughly equal. LOH at a given site was called if there was significantly more cells supporting one allele than the other (symmetric binomial test, *p*<0.05). After identifying the target sites that underwent LOH, we determined the retained haplotype from the major allele at LOH sites and the deleted haplotype from the minor allele at LOH sites.

We then interrogated each cell at the LOH sites. Because there was substantial variability in the amplification efficiency of different targets, we could not directly combine the read counts at different sites for each haplotype. Instead, we determined the dominant allele at each site in each cell and calculated how many times the dominant alleles corresponded to the deleted haplotype and how many times they corresponded to the retained haplotype. In cells with complete heterozygosity, the two counts should be roughly equal. We performed a one-sided binomial test to identify cells with LOH where the dominant alleles always corresponded to the retained haplotype. In this test we excluded all sites covered by four or fewer reads as the dominant alleles at these sites could not be accurately determined due to random sequencing errors.

***E. Identification of clonal and subclonal mutations***

At any site of somatic mutation or LOH, the clonality of this variant can be determined from the number of cells supporting the reference base and the number of cells supporting the alternate base. For clonal LOH, all the cells should show the base corresponding to the retained haplotype; the deleted haplotype is only observed due to amplification/sequencing errors. For subclonal LOH, the number of cells showing the deleted haplotype should be substantially higher than the frequency of amplification/sequencing errors. These two scenarios can be determined by a Poisson test using the error frequency estimated from the sequence coverage at homozygous sites as above. For clonal point mutations, the reference base and the mutated base should be observed in a similar number of cells. For subclonal mutations, the reference base should be observed in more cells than the mutated base. These two scenarios can be determined by a symmetric binomial test. If a point mutation is located in a region of LOH, the clonality of LOH should first be determined from the sequence coverage at flanking heterozygous sites; the clonality of the point mutation can then be separately estimated in the LOH cell population and in the heterozygous population.

***F. Construction of subclonal phylogenies***

The subclonal phylogeny was constructed from the clustering of single-cell genotypes at sites of subclonal variants (both point mutations and LOH). We first digitized the single-cell genotypes at these sites. The genotypes at sites of subclonal mutations were digitized as follows:

1 if there is sufficient support for the mutant allele (see above)

0.5 fewer than 10 reads AND (> 2 reference-supporting reads OR < 3 variant reads)

0 otherwise

The genotypes at sites of subclonal LOH were digitized as the frequency of reads supporting the retained haplotype; at sites with four or fewer reads, the frequency was set to be 0.5 due to inaccuracy in the allelic frequency estimate.

We then clustered cells based on the digital genotypes using the Euclidean metric. We identified subclonal variants from the different cell clusters. Almost all subclonal variants were exclusive to one cluster. A small number of cells (20 out of 219 cells in CLL005 and 2 out of 140 cells in CLL146) harbored subclonal variants that should be mutually exclusive. These were most likely generated when two cells from different clones were sorted into the same well.

From the cell clusters one can straightforwardly construct the subclonal phylogeny. We further calculated the clonality of each mutation based on its presence in different clusters. These numbers were then compared with the estimates from bulk whole-exome sequencing.

**Pathway and geneset overdispersion analysis of single-cell RNA-seq data**

Pathway and gene set overdispersion analysis (PAGODA) was performed using the SCDE package (v1.99.1). Error modeling was performed using the knn.error.models function separately for each sample with parameters k = ncol(cd)/4, min.count.threshold = 2, min.nonfailed = 5. Joint analysis with all samples combined used additional batch correction, treating each sample as a separate batch. Variance normalization was performed using the pagoda.varnorm function with parameters trim = 3/ncol(cd), max.adj.var = 5 to ensure appropriate characterization of variance taking into consideration dependency on gene expression magnitude. Variability due to library size differences was also subtracted using the pagoda.subtract.aspect function. 8437 gene sets from MSigDB were assessed for overdispersion following standard protocol. Significantly overdispersed aspects were further clustered to reduce redundancy with distance.threshold = 0.9.

**Single-cell RNA targeted approach**

1. ***Primer design***

Nested gene expression assays were designed with outer primers for preamplification and inner primers for qPCR detection. For sSNV detection, separate assays were designed to cDNA sequence for the wild-type allele and the mutation allele. Similarly, for heterozygous SNPs, separate assays were designed to cDNA sequences for both alleles. Each assay consists of an allele-specific SuperSelective primer and a common primer shared by the wild-type and mutation assays ([Vargas et al. 2016](#_ENREF_3)). For sSNV and SNP assays, outer primers were designed for preamplification. Technical replicates were performed for all sSNVs and SNPs and averaged in downstream analysis. The primer sequences for all of the RNA expression, SNP, and sSNV assays are listed in Supplementary Table 6.

***B. cDNA generation and preamplification***

cDNA from each single cell was synthesized by adding 1 μl Reverse Transcription Master Mix (100-6299, Fluidigm) to cell lysate and incubating at 25°C for 5 min and 42°C for 30 min, followed by 5 min at 85°C to inactivate reverse transcriptase. Preamplification was performed by adding 4 μl of mix containing 5×PreAmp Master Mix (100-5744, Fluidigm) and 10× Preamplification Primer Mix (500 nM each primer, all the outer primers for all the gene expression, SNP, and mutations assays ) and subjected to the following thermal protocol: 95°C, 5 min; 20 cycles of (96°C, 5s; 60°C, 6 min); 4°C hold. Primers were digested by adding 4 µl Exonuclease I mix (New England BioLabs, Beverly, MA; final concentration 1.14 units/μl) and incubating at 37°C for 30 min and 80°C for 15 min. Reactions were diluted by adding 36 µl 10 mM Tris-HCl, pH 8.0/0.1 mM EDTA.

***C. Mutation calls***

We regressed out the background level of mutant allele expression as a function of normal allele expression, yielding a normalized mutant allele expression level. To call mutations, we assessed the fraction of normalized mutant allele over wild-type plus normalized mutant allele. Cells with this normalized fractional mutant allele below 0.1 were called ‘wild-type’, while cells greater than threshold τ were called ‘mutant’; cells in between were designated ‘unclear.’ Threshold τ was determined by ad-hoc assessment of the negative controls and ranged from 0.2 to 0.35 depending on sample. We restricted subsequent analysis to cells for which we could confidently call wild-type or mutant status. Cells for which we did not detect either the mutant or the wild-type allele, yielding a normalized mutant allele level of 0/0, were not called.

**Functional characterization of *LCP1* and *WNK1* mutation in HEK293 cells**

***A. Antibodies***

Anti-NKCC1 total antibody (residues 1–288 of human NKCC1), anti-NKCC1 phospho-Thr203/Thr207/Thr212 antibody [residues 198–217 of human NKCC1 phosphorylated at Thr203, Thr207 and Thr212; HYYYD(T)HTN(T)YYLR(T)FGHNT], anti-WNK1 total antibody (residues 2360–2382 of human WNK1), anti-WNK1 phospho-Ser382 antibody [residues 377–387 of human WNK1 phosphorylated at Ser382; ASFAK(S)VIGTP]; anti-SPAK total antibody (full-length GST-tagged human SPAK protein), anti-SPAK/OSR1 (S-motif) phospho-Ser373/Ser325 antibody [residues 367–379 of human SPAK; RRVPGS(S)GHLHKT; highly similar to residues 319–331 of human OSR1 in which the sequence is RRVPGS(S)GRLHKT] and anti-ERK1 (extracellular-signal-regulated kinase 1) total antibody (full-length human ERK1 protein) were all raised in sheep and affinity-purified on the appropriate antigen by the Division of Signal Transduction Therapy Unit at the University of Dundee. The rabbit anti-FLAG antibody (F1804, Sigma-Aldrich, St Louis, MO), anti-H2AX (9718, Cell Signaling, Danvers, MA), anti-ATM Ser1981 (5883, Cell Signaling), anti-ATM (total, 2873, Cell Signaling) anti-ATR Ser428 (2853, Cell Signaling), anti-CHK1 Ser317 (2344, Cell Signaling), anti-GAPDH (2118, Cell Signaling), anti-GFP (TA150024, OriGene, Rockville, MD), and anti-DNA-PK Ser2056 (ab18192, Abcam, Cambridge, MA) were purchased. Secondary antibodies coupled to HRP (horseradish peroxidase) used for immunoblotting were obtained from Pierce. All WNK recombinant proteins, DNA constructs, antibodies, generated for this study can be requested on the MRC-PPU reagents website (<https://mrcppureagents.dundee.ac.uk/>).

***B. DNA damage response, colony assay and protein interaction***

DNA damage response in relation to expression of wild-type and mutant *LCP1* was assessed by immunoblot. In brief, HEK293 stable *LCP1* wild-type and mutant cells, as well as control cells, were treated with -irradiation and harvested at various times after irradiation. The cells were washed once with phosphate-buffered saline (PBS), and cell lysates were generated and quantified. Twenty g of cell extracts were fractionated by NuPAGE Bis-Tris Gel and transferred to iBlot 2 PVDF membranes (ThermoFisher Scientific, Cambridge, MA). Membranes were stained with primary antibodies and appropriate secondary antibodies, e.g., horseradish peroxidase-coupled goat anti-rabbit and goat anti-mouse antibodies (Rockland Immunochemicals Inc, Limerick, PA). The bands were visualized by using the ECL chemiluminescence Western blotting detection system (GE Healthcare, Boston, MA).

To measure colony survival, stable HEK293 cells lines were plated in 6-well plates (80-800/per well depending on the dosage of irradiation) one day prior to irradiation. Twenty-four hours after irradiation, media was changed and cells were cultured for 13-15 days, with or without the presence of ATM inhibitor added 1 hour before irradiation (10 M, KU-55933, Abcam, Cambridge, MA). Colonies with more than 50 cells were counted and survival rate was calculated by normalization to the number of colonies without irradiation.

To determine the interaction of LCP1 and ATM, HEK293 cell lines were transiently transfected with the ATM expressing construct (N-terminal His tag, gift from Dr. Brendan Price) and cell lysates were prepared 48 hours after transfection, as described above. Immunoprecipitation was performed with either Ni Sepharose beads (GE Healthcare Life Sciences, Marlborough, MA) or anti-GFP antibody coupled to protein A/G PLUS-Agarose beads (Santa Cruz Biotechnology, Santa Cruz, CA). For each sample, 50 g of protein lysate was precleared with 40 l protein A/G PLUS-Agarose beads for 30 minutes at 4 ˚C. After incubation, the cell lysate was spun at 4˚C for 5 min at 14,000 rpm. Supernatants were added to either Ni Sepharose beads or antibody-crosslinked beads and the immunoprecipitations were rotated for 2 hours at 4˚C then washed five times with 1 ml wash buffer (PBS with 0.1% Triton-X100). Immunoprecipitated protein complex was boiled in SDS lysis buffer and resolved on NuPAGE Bis-Tris Gel gels (ThermoFisher Scientific, Cambridge, MA). The gel was transferred to iBlot PVDF membrane. Western blotting was performed using rabbit anti-ATM or anti-GFP antibody.

***C. Expression of WNK1 recombinant proteins***

All pGEX-6P-1 constructs encoding expression of recombinant with N-terminal Glutathione-S-Transferase (GST) tags were transformed into BL21 E. coli cells, and 1-l cultures were grown at 37°C in Luria Broth containing 100 µg/mL ampicillin until the absorbance at 600 nm was 0.8. Isopropyl ß-d-thiogalactopyranoside (30 µm) was then added, and the cells were cultured for a further 18 h at 26°C. Cells were isolated by centrifugation, re-suspended in 40 mL of ice-cold lysis buffer and lysed in one round of freeze/thawing, followed by sonication (Branson Digital Sonifier; ten 15-s pulses with a setting of 45% amplitude) to fragment DNA. Lysates were centrifuged at 4°C for 15 min at 26 00 g. GST-OSR1 and GST-WNK1 recombinant proteins were affinity-purified on 0.5 mL glutathione–Sepharose and eluted in buffer A containing 0.27 m sucrose and 20 mm glutathione. Purity of protein was assessed by SDS-PAGE and Coomassie staining.

***D. Generation of WNK1 knockout and expression of inducible WNK1 in HEK293 cells***

Detailed analysis of the WNK1 locus (ENSG00000060237) using both Ensembl and NCBI identified four verified and twenty predicted transcriptional variants. Exon 5 was identified as the first exon shared by all known and predicted transcripts and was chosen as the optimal CRISPR target site. The KO guide pair (sense 5’- GCTACTTTGTCAAAACTGGC and antisense 5’- GAAGTGAAGGAAATTATTGA) was identified using the Sanger Institute CRISPR webtool (<http://www.sanger.ac.uk/htgt/wge/find_crisprs>) and chosen on the basis of having the lowest combined off-targeting score whilst being situated entirely within the coding region. Complementary oligos with BbsI compatible overhangs were designed and these dsDNA guide inserts ligated into BbsI-digested target vectors; the antisense guide was cloned into the spCas9 D10A expressing vector pX335 (Addgene Plasmid #42335) and the sense guide into the puromycin selectable plasmid pBABED P U6 (University of Dundee). HEK293 Flp-In T-Rex cells were co-transfected with 1 μg of each plasmid using 1 mg/mL polyethylenimine (PEI) in a 10-cm dish and following 24 h of recovery were subjected to 48 h of puromycin selection (2 μg/mL) to enrich for transfectants. The cell pool was subsequently single cell sorted by FACS and clones analysed for WNK1 depletion by immunoblotting prior to being genotyped to confirm homozygous KO. Sequencing of exon 5 PCR fragments from the final WNK1 KO line revealed two indels (10 base pair deletion and 31 base pair deletion) each leading to frameshift and premature termination thus confirming the successful KO of the WNK1 loci. For generation of Flag-WNK1 WT/V403F expressing cells, HEK293 Flp-In T-Rex WNK1 KO cells were transfected with 20 μL of 1 mg/mL polyethylenimine (PEI) (Polysciences) and 1 μg of pcDNA5 FRT/TO Flag-WNK1 WT/V403F and 9 μg of pOG44, as per the manufacturer’s protocol. At 24 hours, cells were washed with PBS, and selected in DMEM (Dulbecco's modified Eagle's medium) supplemented with 10% (v/v) FBS, 2 mM L-glutamine, 100 units/mL penicillin, 0.1 mg/mL streptomycin, 100 μg/mL hygromycin, and 15 μg/mL blasticidin. T-Rex cultures were induced to express the indicated protein by inclusion of 1 μg/mL doxycycline in the culture medium for 24 h.

***E. WNK1 kinase activity***

To measure WNK1 kinase activity, HEK-293 WNK1 KO line and inducible lines were cultured on 10-cm-diameter dishes in DMEM supplemented with 10% FBS, 2 mM L-glutamine, 100 units/mL penicillin, 0.1 mg/ml streptomycin, 100 μg/ml Zeocin, and 15 μg/ml Blasticidin (Thermo Fisher Scientific Inc, Cambridge, MA). Cells were stimulated with either control isotonic or hypotonic medium for a period of 30 min. Cells were lysed in 0.3ml of ice-cold lysis buffer/dish. Lysates were clarified by centrifugation at 4°C for 15 min at 16000×**g**. Supernatants were frozen in aliquots in liquid nitrogen and stored at -20°C. Protein concentrations were determined using the Bradford method. Kinase activity was analyzed by monitoring phosphorylation of catalytically inactive OSR1 D164A as described previously ([Vitari et al. 2005](#_ENREF_4)). For the assays using recombinant GST-WNK11-661 Wt/V403F/D368A, the reaction mix contained a final volume of 25 μL in buffer A containing 0.08 μM WNK1 kinase, 0.4 μM GST-OSR1 D164A, 0.1 mM [γ32P] ATP, and 5 mM magnesium chloride. Samples were analyzed and quantified similarly to the immunoprecipitates kinase assays

***F. Cell cycle profile***

The WNK1 inducible cell lines were plated on 6-well plate at a density of 0.05 million cells per well. Twenty-four hours later, cells were induced to express WNK1 protein with 0.1 μg/ml doxycycline. After 48 hours of induction, cells were synchronized by serum starvation. Complete media was resumed 24 hours following serum deprivation and the cell cycle was profiled with the Click-iT EdU Assay (Thermo Fisher Scientific Inc, Cambridge, MA) 24 hours after media change.

**References**

Vargas DY, Kramer FR, Tyagi S, Marras SA. 2016. Multiplex Real-Time PCR Assays that Measure the Abundance of Extremely Rare Mutations Associated with Cancer. *PloS one* **11**(5): e0156546.

Vitari AC, Deak M, Morrice NA, Alessi DR. 2005. The WNK1 and WNK4 protein kinases that are mutated in Gordon's hypertension syndrome phosphorylate and activate SPAK and OSR1 protein kinases. *The Biochemical journal* **391**(Pt 1): 17-24.

Zhang CZ, Spektor A, Cornils H, Francis JM, Jackson EK, Liu S, Meyerson M, Pellman D. 2015. Chromothripsis from DNA damage in micronuclei. *Nature* **522**(7555): 179-184.
