# Supplementary material for: Integrated single-cell genetic and transcriptional analysis suggests novel drivers of chronic lymphocytic leukemia
Source: HighWire-hosted journal article supplement (doi:10.1101/gr.217331.116), 2017-07-05
Supplement: Supplemental_Table_S1.xlsx [file Supplemental_Table_S1.xlsx]

## Sheet: Probe performance
					Table 1. Probe performance of targeted DNA PCR assays used in 5 CLL samples
CHROMOSOME	POSITION	REFERENCE	ALTERED	Median Coverage (from 991 single cells)	Mean Cov. (from 991 single cells)	Std. Dev. In Cov.	Mean Depth of Allele Supp.	Variant Qual	Samples with Cov. (> 2 reads)	Ref. Supp. (>1 read and 2% AF)	Alt. Supp. (> 1 read and 2% AF)	MAF
chr1	223177574	A	G	0	0.08	0.561538	0	1242.58	4	5	3	0.375
chr1	224264168	T	C	0	0.22	0.796276	0	1393.94	19	56	32	0.363636
chr1	226923283	G	C	0	0.01	0.0895297	0	0.01	0	0	0	NaN
chr2	3392075	T	C	0	0	0	0	NaN	0	0	0	NaN
chr2	27730940	T	C	0	0.07	0.743547	0	151.81	3	7	2	0.222222
chr2	55873385	C	G	0	0	0.0549648	0	3.87	0	0	0	NaN
chr2	74185876	A	T	0	0.03	0.196598	0	506	1	0	1	0
chr3	58109344	C	A	0	0.27	1.38186	0	0.02	22	37	0	0
chr6	10419476	C	T	0	0	0	0	NaN	0	0	0	NaN
chr6	46555800	A	G	0	0	0.0449013	0	0.01	0	0	0	NaN
chr6	100896042	A	G	0	0.01	0.118075	0	66.23	0	0	0	NaN
chr8	85441675	C	A	0	0.12	0.433391	0	517.61	4	15	6	0.285714
chr8	144992184	G	A	0	0	0	0	NaN	0	0	0	NaN
chr9	134955062	T	A	0	0	0.0549648	0	0.01	0	0	0	NaN
chr9	140811835	G	A	0	0.01	0.109428	0	28.73	0	0	0	NaN
chr10	105110728	G	T	0	0	0	0	NaN	0	0	0	NaN
chr11	397042	C	A	0	0	0	0	NaN	0	0	0	NaN
chr11	120041110	T	A	0	0	0.0549648	0	40.58	0	0	0	NaN
chr15	89392935	T	A	0	0.02	0.144854	0	13.43	0	1	1	0.5
chr17	9804473	C	G	0	0.07	0.395007	0	2.19	3	6	0	0
chr17	17409560	C	T	0	0	0.031766	0	0	0	0	0	NaN
chr2	33623306	C	T	0	4.74	16.0566	4	20536.4	255	221	121	0.353801
chr6	2623820	G	A	0	2.78	11.9156	2	13569.1	194	200	86	0.300699
chr11	115541768	G	A	0	1.18	4.17351	1	11247.9	114	165	126	0.43299
chr12	49424171	G	T	0	5.82	25.4537	5	39682.7	296	313	57	0.154054
chr16	71710491	C	T	0	1.48	4.42233	1	991.22	147	186	9	0.0461538
chr17	3168978	A	G	0	4.81	27.7595	4	73036.6	270	124	234	0.346369
chr17	15608194	T	G	2	3.52	6.78153	3	30331.5	335	316	298	0.485342
chr17	21207916	A	G	0	1.86	7.96156	1	1976.5	140	185	26	0.123223
chr18	6977719	A	G	0	1.5	4.52219	1	6797.51	151	178	32	0.152381
chr19	12739115	A	G	0	1.39	3.18461	1	968.98	142	293	23	0.0727848
chr20	2796417	C	T	1	2.04	5.15998	2	1372.93	211	282	8	0.0275862
chrX	23019331	T	C	0	0.54	1.72855	0	367.59	52	145	8	0.0522876
chr2	44040401	G	C	1	10.42	40.4815	10	1077.94	400	479	3	0.00622407
chr4	1016183	G	T	0	0.92	4.94344	0	0.02	57	205	0	0
chr4	8398797	C	A	9	18.72	40.0417	18	0.01	754	864	5	0.00575374
chr7	47947689	G	T	36	118.51	354.378	100	0	911	950	0	0
chr9	123533783	C	A	32	63	137.611	57	0	892	943	2	0.0021164
chr12	48526691	G	T	0	2.3	7.76014	2	0.01	205	276	0	0
chr16	56553664	C	A	6	21	56.3664	20	0.01	669	822	0	0
chr16	67765413	G	T	8	19.94	30.7201	19	0.02	690	802	1	0.00124533
chr17	21319399	A	G	0	1.04	2.50285	1	228.63	123	264	4	0.0149254
chr17	62029027	C	A	5	69.52	332.383	56	0	591	632	0	0
chr18	2913431	T	C	0	0.61	2.04629	0	88.85	76	110	1	0.00900901
chr19	1622111	G	T	0	2.11	7.02706	2	0.01	146	263	0	0
chrX	48771551	G	T	8	23.63	47.3675	23	0.01	711	835	0	0
chrX	99661766	G	A	4	11.95	27.1995	11	20047.6	550	589	118	0.166902
chrX	114880474	C	A	8	22.03	43.2408	21	0	645	767	0	0
chr1	11188165	T	A	9	19.16	31.4628	18	74622.9	739	810	132	0.140127
chr1	67795298	A	G	32	66.92	122.191	63	18448.9	912	943	43	0.0436105
chr1	93720074	G	A	19	34.02	52.0948	30	168937	815	848	210	0.198488
chr1	117142753	G	T	72	179.47	407.825	147	106528	948	957	113	0.105607
chr1	201019612	G	A	18	41.8	73.6697	40	70474.7	849	900	119	0.116781
chr1	218416654	G	A	29	73.9	193.196	65	1.22193e+06	844	553	573	0.491119
chr1	220140714	T	C	24	104.6	258.294	92	846791	823	564	519	0.479224
chr1	220331205	C	G	27	92.23	231.975	80	656424	854	816	346	0.297762
chr1	220970028	A	G	42	110.36	222.172	99	1.14731e+06	928	704	732	0.490251
chr1	222721288	C	T	26	79.88	197.788	70	1.5057e+06	860	295	731	0.287524
chr1	223124916	T	G	37	107.92	232.142	99	2.30955e+06	918	184	906	0.168807
chr1	224517842	C	T	13	39.72	67.2094	38	783641	725	217	709	0.234341
chr1	248263356	A	C	70	152.63	386.744	131	192203	952	967	83	0.0790476
chr2	8887180	A	G	28	61.75	140.195	55	137202	865	905	118	0.115347
chr2	10045014	C	T	34	65.15	100.039	61	1.63836e+06	866	144	922	0.135084
chr2	11312181	G	A	13	33.41	62.7199	31	312410	788	643	507	0.44087
chr2	18113623	A	G	63	157.88	295.679	136	1.98229e+06	950	767	781	0.495478
chr2	24245659	C	T	8	18.19	32.3075	17	67764.5	693	710	216	0.233261
chr2	30976058	C	T	39	113.53	229.993	102	1.43108e+06	919	746	766	0.493386
chr2	47690411	T	C	35	132.61	402.482	99	1.82909e+06	883	875	270	0.235808
chr2	67630476	T	C	17	39.21	101.55	36	137959	827	838	208	0.198853
chr2	69746296	C	T	33	59.49	87.6287	56	301156	875	862	333	0.278661
chr2	71060936	G	C	19	52.86	96.984	51	401143	837	711	465	0.395408
chr2	179478635	G	A	19	49.3	120.362	45	74204	813	888	50	0.0533049
chr2	198266611	C	T	8	20.69	31.5312	20	2813.4	702	828	18	0.0212766
chr2	198266834	T	C	19	32.44	44.3179	31	70763.6	818	838	143	0.14577
chr2	198948501	G	A	17	45.22	95.4528	42	67915.1	844	872	116	0.117409
chr3	27759159	C	T	24	56.1	182.334	50	144411	904	905	150	0.14218
chr3	38182641	T	C	7	15.52	25.931	15	48537.1	686	740	164	0.181416
chr3	44968328	T	C	13	29.49	56.4725	28	30855.3	798	847	107	0.112159
chr3	151012583	G	A	47	102.89	167.452	91	111052	925	939	132	0.123249
chr3	169831189	T	A	27	56.16	98.149	53	79927.1	897	956	70	0.0682261
chr4	55964926	T	C	25	58.03	123.393	52	52914.9	870	933	85	0.0834971
chr4	104032100	C	T	16	33.33	105.207	29	40061.3	849	857	117	0.120123
chr4	123160976	G	T	38	76.34	139.947	71	124395	908	903	136	0.130895
chr5	96333765	C	G	38	72.97	136.427	65	194509	910	935	145	0.134259
chr5	126755842	C	T	59	118.37	207.646	109	316737	920	937	156	0.142726
chr6	1742794	A	G	51	114.42	248.568	103	1.15898e+06	939	692	388	0.359259
chr6	3152822	C	G	8	28.34	69.568	26	63975.1	704	798	69	0.0795848
chr6	4044109	G	A	47	77.2	110.973	73	167783	916	888	139	0.135346
chr6	5999464	C	G	5	22.58	47.3792	21	397981	649	237	702	0.252396
chr6	7987883	G	C	22	67.26	168.328	62	634374	843	757	521	0.407668
chr6	11723409	G	A	23	52.25	84.3612	50	772901	816	402	647	0.383222
chr6	46107752	C	G	35	69.51	113.299	65	531730	891	661	519	0.439831
chr6	47754498	A	G	45	85.86	119.814	83	1.29564e+06	903	485	847	0.364114
chr6	51720838	T	C	20	46.74	152.703	41	426812	837	763	404	0.346187
chr6	52303399	A	G	25	54.5	119.084	55	187872	867	813	254	0.238051
chr6	53519605	C	T	11	30.65	56.601	31	743630	784	238	777	0.234483
chr6	56482801	C	G	29	56.5	109.967	52	640715	894	786	637	0.447646
chr6	62442604	A	G	61	116.07	202.715	108	953371	947	891	459	0.34
chr7	28997300	C	A	5	13.62	23.5799	13	19935.1	592	717	91	0.112624
chr7	43918091	T	C	18	36.58	53.8073	35	30467.7	833	893	91	0.0924797
chr7	122114562	C	T	29	58.06	96.5536	54	118884	889	904	148	0.140684
chr8	1824829	G	A	15	30.2	72.386	28	105421	844	885	171	0.161932
chr8	30889491	C	A	15	33.85	61.369	32	20612.3	818	874	93	0.0961737
chr9	73376601	A	G	68	189.99	454.625	155	128369	954	971	85	0.0804924
chr9	113251947	A	G	109	249.33	504.848	203	859701	967	953	266	0.218212
chr10	6540487	C	A	24	50.88	94.8295	47	33561.9	889	934	31	0.0321244
chr10	50955189	C	A	20	47.57	82.9433	47	57070.2	837	905	58	0.0602285
chr10	70231558	G	C	16	32.93	51.8096	32	74822.5	779	809	110	0.119695
chr11	65144428	G	A	6	20.57	38.2911	20	96913.9	621	674	177	0.207991
chr11	82564294	T	G	44	92.36	146.797	84	799268	924	800	390	0.327731
chr11	85627108	T	C	25	73.57	213.621	72	436415	849	554	495	0.471878
chr11	90955972	C	T	26	62.41	113.56	58	966479	871	537	588	0.477333
chr11	91612376	T	A	33	87.43	158.836	81	1.68913e+06	922	382	888	0.300787
chr11	100095716	C	G	20	45.39	135.848	40	679452	825	420	780	0.35
chr11	101323770	C	T	14	43.17	106.242	40	369339	796	695	336	0.325897
chr11	102595492	G	A	8	23.47	79.5338	21	124829	695	716	365	0.33765
chr11	107197640	T	C	34	91.42	223.345	85	660138	911	874	389	0.307997
chr11	107578721	C	G	30	68.06	127.933	61	744326	889	539	716	0.429482
chr11	108235819	A	G	60	139.46	243.04	128	699140	949	831	260	0.238313
chr11	108861193	C	A	37	90.14	203.914	80	271427	897	841	337	0.286078
chr11	110451885	A	G	25	66.59	149.693	61	89903.4	869	923	100	0.0977517
chr11	110697305	C	G	4	15.91	36.7155	15	276676	555	209	479	0.303779
chr11	113679119	C	T	24	223.37	759.876	148	5.29969e+06	788	219	769	0.22166
chr11	114568942	T	C	68	194.11	507.529	150	1.70612e+06	956	801	440	0.354553
chr11	115764486	G	A	87	367.25	1667.09	227	4.53607e+06	968	514	826	0.383582
chr11	122929407	T	G	10	20.84	31.2674	20	94288.4	747	668	262	0.28172
chr11	123477352	G	A	48	86.68	118.883	84	843914	909	817	598	0.422615
chr11	123485444	T	C	44	88.28	125.16	85	828900	930	866	636	0.423435
chr11	128781661	A	T	10	23.49	38.6544	22	75073	766	835	134	0.138287
chr12	939222	G	T	22	39.91	57.8275	39	40369.1	834	881	70	0.0736067
chr12	6777276	T	C	7	19.79	35.8892	19	29309.2	688	790	98	0.11036
chr12	42863361	T	A	17	44.89	142.384	41	96929.1	817	834	127	0.132154
chr12	50055762	G	A	29	87.23	168.522	83	376455	895	904	202	0.18264
chr12	95918504	A	G	38	151.09	338.85	132	469419	938	949	105	0.0996205
chr12	102589846	A	C	48	89.09	131.007	81	405856	932	933	206	0.18086
chr12	111158895	G	A	10	26.37	81.408	25	104320	763	815	117	0.125536
chr12	111744859	C	T	12	25.29	41.9015	24	26121	772	784	142	0.153348
chr12	112888198	G	A	29	59.13	125.067	52	58495.9	922	933	127	0.119811
chr12	125397603	T	C	9	40.84	130.612	38	36317.9	726	794	49	0.0581257
chr13	23894811	C	T	21	56.01	115.362	54	57187	817	857	121	0.123722
chr13	36397012	C	A	11	24.89	36.9791	24	52513.9	788	818	117	0.125134
chr13	43788158	G	A	13	30.05	49.1	29	540152	804	321	829	0.27913
chr13	45985583	T	G	6	15.32	26.406	15	29689.7	666	782	58	0.0690476
chr13	46367379	G	T	27	66.79	131.56	64	1.64923e+06	897	351	840	0.29471
chr13	46733038	G	A	25	61.63	164.67	55	62837.8	868	908	89	0.0892678
chr13	47297352	G	A	14	30.33	61.4673	29	365998	773	423	605	0.411479
chr13	47469940	G	A	393	2705.68	7790.31	495	9.0088e+06	943	613	612	0.499592
chr13	49234466	A	C	86	217.86	510.944	173	2.93011e+06	967	646	770	0.456215
chr13	49776080	A	G	6	16.6	30.1486	16	48346.5	645	747	131	0.149203
chr13	49951142	T	C	27	73.58	215.82	63	1.11989e+06	881	599	684	0.466875
chr13	50107904	G	A	12	22.03	30.038	21	448304	774	161	739	0.178889
chr13	50141345	G	A	26	63.57	120.932	60	1.51813e+06	876	183	792	0.187692
chr13	53422553	A	G	6	13.46	24.2011	13	92855.6	631	615	311	0.335853
chr13	53602970	A	G	15	29.04	46.698	28	404930	827	519	613	0.458481
chr13	58208479	A	T	9	31.72	74.3213	28	152157	754	725	203	0.21875
chr13	67800935	G	A	15	36.97	57.9604	35	610549	816	463	693	0.400519
chr13	73329358	G	A	50	136.95	611.187	107	1.94529e+06	925	555	851	0.394737
chr13	73343039	C	T	17	41.38	74.8288	39	560647	789	428	748	0.363946
chr14	91947962	A	C	14	36.73	71.2931	34	35806.3	814	856	91	0.0960929
chr14	96997838	A	G	13	28.04	41.69	26	39956.9	774	858	115	0.118191
chr15	63000937	G	A	21	47.79	119.004	43	193288	872	903	221	0.196619
chr15	86312538	G	C	11	27.5	51.0506	27	78095.9	772	829	168	0.168506
chr17	440497	G	A	13	48.05	117.033	47	756769	785	595	424	0.416094
chr17	1680318	A	G	12	48.31	146.412	45	624559	775	726	535	0.424266
chr17	2185827	T	A	22	52.05	88.1534	49	297338	847	811	316	0.28039
chr17	4637698	G	A	11	27.97	48.4136	26	69845.6	741	754	209	0.21703
chr17	4883818	C	G	4	18.37	40.2442	18	132629	595	403	434	0.481481
chr17	6515387	A	G	25	59.52	99.3042	58	924951	868	611	748	0.449595
chr17	6978319	A	G	19	78.95	229.853	68	212180	794	821	84	0.0928177
chr17	7491910	G	A	1	6.87	18.5544	6	26407.3	305	314	64	0.169312
chr17	7529902	G	A	8	24.07	44.5145	23	35034.4	693	760	85	0.100592
chr17	7536527	G	A	49	468.82	1742.29	218	1.52871e+06	816	791	239	0.232039
chr17	7577538	C	T	29	71	197.006	63	47888.1	885	932	46	0.0470348
chr17	7578265	A	G	5	10.97	20.2665	10	39128.4	597	664	102	0.133159
chr17	8076655	C	T	14	33.62	81.6935	31	425236	776	617	556	0.473998
chr17	9808571	T	G	13	29.59	63.8017	28	133861	765	761	214	0.219487
chr17	10412901	C	A	23	49.87	105.206	66	119599	920	920	123	0.117929
chr17	10450816	T	C	54	99.02	162.903	92	1.43955e+06	920	633	668	0.486549
chr17	11835331	G	A	11	27.93	54.7266	27	218831	780	693	353	0.337476
chr17	14005439	G	A	43	86.15	151.364	78	1.21815e+06	915	649	776	0.455439
chr17	15961951	A	G	28	94.31	377.99	74	1.52915e+06	887	441	820	0.349722
chr17	16216988	G	C	10	21.59	36.1627	21	28694.4	771	837	69	0.0761589
chr17	16842912	A	G	6	19.99	37.6841	19	326941	617	383	484	0.441753
chr17	17948475	G	A	10	21.84	38.461	21	475214	738	234	747	0.238532
chr17	18003648	G	A	8	21	48.1519	20	81160.2	666	688	189	0.215507
chr17	19861458	C	T	75	149.7	222.512	136	1.90943e+06	956	769	741	0.490728
chr17	20911173	G	T	5	65.65	236.215	56	3271.29	555	583	20	0.0331675
chr17	20924523	G	A	22	40.8	57.7161	39	609544	842	430	772	0.357737
chr17	47696435	C	T	44	78.56	104.355	77	96701.6	906	914	128	0.122841
chr18	6889973	A	G	30	69.74	140.732	63	501126	870	766	505	0.397325
chr18	11893391	C	T	10	21.31	31.9974	20	287582	733	395	547	0.419321
chr18	12028247	A	G	17	46.05	119.847	43	630728	810	637	568	0.471369
chr18	12984144	C	A	26	68.3	144.727	64	1.32018e+06	855	485	697	0.410321
chr18	61570284	C	A	45	87.52	125.899	84	214513	934	925	151	0.140335
chr20	40743924	G	A	23	43.77	73.775	43	101378	887	889	137	0.133528
chr20	55021023	T	A	6	16.93	30.6203	16	2374.24	657	800	29	0.0349819
chr21	34621042	T	A	23	50.85	112.152	47	208934	840	856	161	0.158309
chr21	39086658	C	T	8	19.22	33.4245	18	80217.6	696	713	127	0.15119
chrX	38525524	C	T	24	77.89	203.417	69	266905	844	863	140	0.139581
chrX	41196686	C	A	8	32.39	86.4585	30	120030	671	643	138	0.176697
chrX	138619312	T	G	33	122.69	347.087	100	62509	851	884	18	0.0199557
