# Supplementary material for: Integrated single-cell genetic and transcriptional analysis suggests novel drivers of chronic lymphocytic leukemia
Source: HighWire-hosted journal article supplement (doi:10.1101/gr.217331.116), 2017-07-05
Supplement: Supplemental_Table_S2.xlsx [file Supplemental_Table_S2.xlsx]

## Sheet: Sheet1
Table 2. Summary of single-cell DNA analysis in 5 CLL samples
Sample name	Whole genome amplification		sSNV assays		sCNV assays			Summary
	Total cell number started	Number of cells with good amplification (total DNA >100ng after amplification)	Number of assays designed	Number of successful assays	Cytogenetic abnormality	Number of assay designed	Number of successful assays	total number assays designed	Number of cells used in the analysis
CLL003	192	184 (96)	16	15 (94)	del (17p), del (13q)	22	21(95)	38	155
CLL005	288	250 (87)	20	19 (95)	del(11q), del(13q)	24	23 (100)	44	219
CLL032	288	208 (72)	16	12 (75)	del(11q), del(13q)	17	16(100)	33	163
CLL096	192	182 (95)	19	12 (53)	del(13q), del(11q)			19	146
CLL146	192	159 (83)	19	14 (63)	Trisomy 2, del(18p), del (6p), del(17p)	48	47 (93)	71	140
Total	1152	991	90	72		111	107	201	823
