# Supplementary material for: Integrated single-cell genetic and transcriptional analysis suggests novel drivers of chronic lymphocytic leukemia
Source: HighWire-hosted journal article supplement (doi:10.1101/gr.217331.116), 2017-07-05
Supplement: Supplemental_Table_S3.xlsx [file Supplemental_Table_S3.xlsx]

## Sheet: DNA and CCF
Table 3. Frequency of genetic alterations determined from single-cell DNA and RNA analysis
Gene name	CCF	Single cell DNA analysis
ARHGEF10	0.64	0.71301
ATM	0.83	1
CACNA15	1	0.640351
CADPS2	0.85	1.03061
CASS4	0.26	0.222222
CCDC18	1	1
CENPE	0.96	0.847826
CUX2	0.77	0.888889
DCLK1	0.82	1
DDX3X	1	1
DNA2	1	1
EOMES	1	0.970297
F9	0.19	0.106667
FMNL3	0.94	0.901961
GPR87	0.94	0.57971
IFNAR2	0.73	0.66
IGSF3	1	0.394904
IL12RB2	0.18	0.126316
KCNJ5	0.55	0.616154
KCNJ6	0.84	0.853714
KDR	0.18	0.207194
KIAA1109	0.99	0.756522
KLHL25	0.86	0.858209
LCP1	0.22	0.28
LNPEP	0.8	0.869919
MEGF10	0.84	1
MLL2	1	1
MTOR	0.74	0.712174
MYD88	1	1
MYH1	0.78	0.702857
OGDHL	0.28	0.31
OR2L13	0.34	0.25
PAPOLA	0.85	0.788235
PARPBP	1	0.899371
PCDH17	0.82	1
PCDH17	1	1
PHC3	0.4	0.330435
PLCL1	0.79	0.8125
PPP1CC	0.84	1
PRICKLE1	1	1
PRKCQ	0.21	0.0782609
PTPN11	0.36	0.22314
PTPRT	1	0.892157
PURG	0.53	0.573529
SERPINB2	0.82	1
SF3B1	0.87	0.871287
SF3B1	0.17	0.209677
SGCG	1	0.852632
SLC25A45	1	1
SMEK1	0.38	0.6825
SPOP	0.73	0.674797
SVEP1	1	1
TLN2	0.88	0.972222
TP53	0.16	0.16
TP53	0.71	1
TRIL	0.57	1
TRPM3	0.23	0.355556
TSPAN7	0.95	0.943925
TTN	0.13	0.178182
UBC	0.52	0.392405
URGCP	0.22	0.389474
USP44	0.5	0.393333
WNK1	0.5	0.588462
ZDHHC3	1	0.8125
ZNF384	1	0.84375
del11	0.727	0.72
del13	0.697	0.72
del17	0.354	0.4
del6	0.07	0.4

## Sheet: RNA and CCF
Table 3. Frequency of genetic alterations determined from single-cell DNA and RNA analysis
Gene name	CCF	Mutation call with RNA
ATM	0.83	0.901709
IFNAR2	0.73	0.530435
IGSF	1	0.467213
ITPKB	0.79	0.983607
KIAA1109	0.857143	0.595745
KMT2D (MLL)	1	0.754386
LCP1	0.22	0.194757
LNPEP	0.8	0.719231
MED27	0.65	0.272727
MYD88	1	0.584507
PHC3	0.4	0.255435
PTPN11	0.36	0.212996
SF3B1	0.17	0.120879
SF3B1	0.87	0.951327
SPOP	0.73	0.466102
USP44	0.5	0.23
WNK1	0.5	0.408922
ZDHHC3	1	0.619048
ZNF384	1	0.697368
ZNF791	0.87	0.669231
LCP1 SNP 13 CLL371.1AL7, del(13q)	0.7	0.872727
BIRC3 SNP 11 CLL372.1AL7, del(11q)	0.73	0.62963
PICALM SNP 11 CLL373.1AL7, del(11q)	0.73	0.785714
USP28 SNP 11 CLL374.1AL7, del(11q)	0.73	0.64
CEP57 SNP 11 CLL376.1AL7, del(11q)	0.73	0.821429
FAM76B SNP 11 CLL377.1AL7, del(11q)	0.73	0.8125
