# Supplementary material for: Integrated single-cell genetic and transcriptional analysis suggests novel drivers of chronic lymphocytic leukemia
Source: HighWire-hosted journal article supplement (doi:10.1101/gr.217331.116), 2017-07-05
Supplement: Supplemental_Table_S5_.xlsx [file Supplemental_Table_S5_.xlsx]

## Sheet: joint
Table 5. Summary of significant overdispersed pathways and genesets with nonredundant aspects of transcriptional heterogeneity from single-cell analysis of 4 CLL samples
Name	n	Score	z	Adj.z		non-redundant aspect names
REACTOME_PEPTIDE_CHAIN_ELONGATION	77	2.20896	17.2065	16.535		#PC1# CAVARD_LIVER_CANCER_MALIGNANT_VS_BENIGN
KEGG_RIBOSOME	80	2.17284	16.9696	16.3307		#PC1# REACTOME_PEPTIDE_CHAIN_ELONGATION
GO:0022626 cytosolic ribosome	91	2.06346	16.2541	15.612		#PC1# GO:0042407 cristae formation
REACTOME_INFLUENZA_VIRAL_RNA_TRANSCRIPTION_AND_REPLICATION	94	2.04934	16.2233	15.5983		#PC1# BIOCARTA_NKT_PATHWAY
CAVARD_LIVER_CANCER_MALIGNANT_VS_BENIGN	12	2.95526	16.186	15.5738		#PC1# GO:0000301 retrograde transport, vesicle recycling within Golgi
REACTOME_NONSENSE_MEDIATED_DECAY_ENHANCED_BY_THE_EXON_JUNCTION_COMPLEX	98	2.01203	15.9434	15.3334		#PC1# GO:0019082 viral protein processing
REACTOME_3_UTR_MEDIATED_TRANSLATIONAL_REGULATION	98	2.01016	15.9201	15.3193		#PC1# GO:0000974 Prp19 complex
REACTOME_SRP_DEPENDENT_COTRANSLATIONAL_PROTEIN_TARGETING_TO_MEMBRANE	101	1.98997	15.7959	15.199		#PC1# GO:0001825 blastocyst formation
GO:0006614 SRP-dependent cotranslational protein targeting to membrane	101	1.9884	15.7762	15.1861		#PC1# GO:0016814 hydrolase activity, acting on carbon-nitrogen (but not peptide) bonds, in cyclic amidines
GO:0006613 cotranslational protein targeting to membrane	103	1.97092	15.6378	15.0494		#PC1# GO:0006637 acyl-CoA metabolic process
GO:0045047 protein targeting to ER	107	1.94217	15.4291	14.8389
GO:0000184 nuclear-transcribed mRNA catabolic process, nonsense-mediated decay	110	1.92375	15.3046	14.7153		All significantly overdispersed annotated pathways are provided. Pathways are further clustered into non-redundant aspects of transcriptional heterogeneity, represented by one pathway’s name. For all sheets, the z column gives the Z-score of pathway over-dispersion relative to the genome-wide model (Z-score of 1.96 corresponds to P-value = 0.05). The z.adj column shows the Z-score adjusted for mu…
GO:0072599 establishment of protein localization to endoplasmic reticulum	110	1.91695	15.2153	14.6279
HOWLIN_CITED1_TARGETS_2_UP	11	2.82754	15.0572	14.4685
REACTOME_INFLUENZA_LIFE_CYCLE	127	1.83357	14.6768	14.0772
OLSSON_E2F3_TARGETS_UP	15	2.61929	14.6432	14.0468
PARK_HSC_VS_MULTIPOTENT_PROGENITORS_UP	14	2.63794	14.5526	13.9566
HOWLIN_CITED1_TARGETS_1_UP	19	2.49946	14.5268	13.9339
BRACHAT_RESPONSE_TO_CISPLATIN	17	2.52396	14.3498	13.7533
BRACHAT_RESPONSE_TO_METHOTREXATE_UP	18	2.48792	14.2619	13.6653
GO:0070972 protein localization to endoplasmic reticulum	125	1.80825	14.2581	13.6649
GO:0044391 ribosomal subunit	143	1.77065	14.2547	13.6647
REACTOME_TRANSLATION	136	1.78265	14.2287	13.6408
RODRIGUES_NTN1_AND_DCC_TARGETS	23	2.34588	13.9265	13.3286
CHANDRAN_METASTASIS_TOP50_DN	35	2.15665	13.6312	13.023
FURUKAWA_DUSP6_TARGETS_PCI35_UP	33	2.13175	13.2063	12.5809
GO:0003735 structural constituent of ribosome	143	1.69846	13.1774	12.5536
GO:0044445 cytosolic part	162	1.65085	12.9044	12.2699
GO:0019083 viral transcription	174	1.63003	12.8347	12.1994
GO:0006415 translational termination	164	1.6393	12.7652	12.1291
GO:0006612 protein targeting to membrane	167	1.62746	12.6408	12.0009
SENESE_HDAC2_TARGETS_DN	41	2.00072	12.617	11.9785
BRUINS_UVC_RESPONSE_VIA_TP53_GROUP_C	42	1.98744	12.5571	11.9179
GO:0019080 viral gene expression	182	1.60241	12.5434	11.9061
GO:0006414 translational elongation	183	1.58855	12.33	11.6836
GO:0044033 multi-organism metabolic process	189	1.57617	12.2357	11.5865
GO:0000956 nuclear-transcribed mRNA catabolic process	176	1.58609	12.1485	11.4968
COATES_MACROPHAGE_M1_VS_M2_UP	46	1.9113	12.0413	11.386
SNF5_DN.V1_DN	52	1.86493	11.9092	11.2485
MARSON_FOXP3_TARGETS_UP	51	1.86049	11.8006	11.1359
JOHNSTONE_PARVB_TARGETS_1_DN	42	1.91411	11.7979	11.1352
GO:0006402 mRNA catabolic process	189	1.54703	11.7321	11.0677
GO:0005840 ribosome	194	1.54008	11.7013	11.0372
PLASARI_TGFB1_SIGNALING_VIA_NFIC_1HR_DN	53	1.82861	11.5582	10.8876
MOHANKUMAR_TLX1_TARGETS_DN	54	1.81061	11.4086	10.7308
GO:0022625 cytosolic large ribosomal subunit	53	1.81465	11.3996	10.7233
REACTOME_METABOLISM_OF_MRNA	192	1.52046	11.3195	10.6402
TAKEDA_TARGETS_OF_NUP98_HOXA9_FUSION_8D_DN	76	1.71631	11.2901	10.611
CHICAS_RB1_TARGETS_LOW_SERUM	65	1.7523	11.2696	10.5911
geneCluster.123	120	2.70045	10.8323	10.3636
GO:0043624 cellular protein complex disassembly	214	1.4718	10.793	10.0851
GO:0006401 RNA catabolic process	215	1.46719	10.7217	10.0107
geneCluster.130	14	4.0931	10.3322	9.9097
PKCA_DN.V1_DN	65	1.6946	10.5571	9.83637
SENESE_HDAC1_AND_HDAC2_TARGETS_DN	85	1.63084	10.4896	9.76598
SARRIO_EPITHELIAL_MESENCHYMAL_TRANSITION_DN	79	1.6391	10.3916	9.66267
GO:0043241 protein complex disassembly	230	1.43257	10.273	9.53714
GO:0006413 translational initiation	238	1.42345	10.2008	9.46126
ACEVEDO_FGFR1_TARGETS_IN_PROSTATE_CANCER_MODEL_DN	101	1.5751	10.198	9.46016
GAVIN_FOXP3_TARGETS_CLUSTER_P3	99	1.57154	10.0888	9.34434
GO:0032984 macromolecular complex disassembly	240	1.40233	9.8031	9.03749
REACTOME_METABOLISM_OF_RNA	236	1.40287	9.76298	8.99587
GO:0015934 large ribosomal subunit	86	1.56882	9.66025	8.88632
TAKEDA_TARGETS_OF_NUP98_HOXA9_FUSION_3D_UP	82	1.57566	9.62843	8.8536
REACTOME_RESPIRATORY_ELECTRON_TRANSPORT_ATP_SYNTHESIS_BY_CHEMIOSMOTIC_COUPLING_AND_HEAT_PRODUCTION_BY_UNCOUPLING_PROTEINS_	89	1.55814	9.6006	8.82517
REACTOME_RESPIRATORY_ELECTRON_TRANSPORT	74	1.58924	9.54279	8.76414
GO:0042407 cristae formation	11	2.04049	9.53776	8.76043
GINESTIER_BREAST_CANCER_20Q13_AMPLIFICATION_UP	90	1.54266	9.4075	8.62046
AFFAR_YY1_TARGETS_UP	85	1.53774	9.18733	8.38192
FERRANDO_LYL1_NEIGHBORS	10	1.98542	8.9164	8.08658
KEGG_PARKINSONS_DISEASE	107	1.47721	8.87342	8.04107
GO:0090150 establishment of protein localization to membrane	280	1.33552	8.84083	8.00696
GO:0042611 MHC protein complex	14	1.88628	8.81616	7.98153
GO:0007007 inner mitochondrial membrane organization	17	1.81737	8.62116	7.76799
HSIAO_HOUSEKEEPING_GENES	355	1.29555	8.57781	7.72175
GO:0071624 positive regulation of granulocyte chemotaxis	11	1.91316	8.54659	7.68889
WAMUNYOKOLI_OVARIAN_CANCER_LMP_DN	113	1.44649	8.52234	7.66373
GO:1902624 positive regulation of neutrophil migration	13	1.86875	8.51864	7.66133
GO:0000301 retrograde transport, vesicle recycling within Golgi	21	1.75241	8.45827	7.59605
GO:0090023 positive regulation of neutrophil chemotaxis	11	1.90175	8.45579	7.59497
GO:0000042 protein targeting to Golgi	17	1.79662	8.43507	7.57361
geneCluster.136	19	2.76194	8.00619	7.54081
geneCluster.147	20	2.73423	7.99987	7.54081
WHITFIELD_CELL_CYCLE_G2	109	1.44432	8.39791	7.53399
GO:0090022 regulation of neutrophil chemotaxis	12	1.87206	8.38718	7.52368
GO:1902622 regulation of neutrophil migration	14	1.83433	8.37614	7.51302
GO:0071622 regulation of granulocyte chemotaxis	12	1.86934	8.36493	7.50214
GO:0051861 glycolipid binding	13	1.84835	8.34834	7.48527
GO:0036296 response to increased oxygen levels	16	1.79831	8.32819	7.46443
GO:0055093 response to hyperoxia	16	1.79788	8.32431	7.46165
GO:0008053 mitochondrial fusion	17	1.7834	8.31575	7.45366
KEGG_OXIDATIVE_PHOSPHORYLATION	110	1.43499	8.26964	7.40387
BILD_HRAS_ONCOGENIC_SIGNATURE	131	1.40576	8.20767	7.33634
GO:0072600 establishment of protein localization to Golgi	19	1.74545	8.18868	7.31666
STARK_PREFRONTAL_CORTEX_22Q11_DELETION_UP	131	1.40425	8.18167	7.31033
GO:0019058 viral life cycle	320	1.28997	8.15649	7.28371
GO:0031304 intrinsic component of mitochondrial inner membrane	20	1.73006	8.14555	7.27378
GO:0031305 integral component of mitochondrial inner membrane	20	1.73	8.145	7.27378
geneCluster.149	13	2.8087	7.68175	7.23347
geneCluster.133	10	2.91651	7.64155	7.2157
GO:0071556 integral component of lumenal side of endoplasmic reticulum membrane	17	1.7548	8.05554	7.17529
GO:0098553 lumenal side of endoplasmic reticulum membrane	17	1.75436	8.0516	7.17231
GO:0003823 antigen binding	36	1.60527	8.0497	7.17161
MCBRYAN_PUBERTAL_BREAST_5_6WK_DN	99	1.43661	8.04375	7.16636
geneCluster.135	10	2.86289	7.52484	7.12239
geneCluster.129	20	2.54522	7.51578	7.12239
REACTOME_METABOLISM_OF_PROTEINS	328	1.27995	7.97915	7.09544
GO:0098576 lumenal side of membrane	18	1.73069	7.94397	7.05742
YAP1_DN	20	1.70818	7.93581	7.04965
REACTOME_TCA_CYCLE_AND_RESPIRATORY_ELECTRON_TRANSPORT	120	1.40052	7.90625	7.01787
BIOCARTA_NKT_PATHWAY	10	1.84995	7.86154	6.96903
GO:0023026 MHC class II protein complex binding	14	1.76838	7.80565	6.90826
GO:0023023 MHC protein complex binding	14	1.76831	7.80507	6.90826
SENESE_HDAC1_TARGETS_DN	121	1.38581	7.6743	6.76218
PASINI_SUZ12_TARGETS_DN	161	1.3484	7.6675	6.75585
geneCluster.140	9	2.72871	7.12128	6.72284
ODONNELL_TFRC_TARGETS_UP	204	1.31747	7.62155	6.70526
KEGG_ANTIGEN_PROCESSING_AND_PRESENTATION	37	1.56244	7.61095	6.69461
GO:0002577 regulation of antigen processing and presentation	10	1.81362	7.57028	6.64989
GRAHAM_CML_QUIESCENT_VS_NORMAL_QUIESCENT_DN	20	1.66735	7.53895	6.61572
GO:0033198 response to ATP	16	1.71028	7.53203	6.60919
GRADE_COLON_CANCER_DN	20	1.66178	7.48421	6.55624
ONO_FOXP3_TARGETS_UP	15	1.71556	7.46219	6.53253
BILANGES_SERUM_AND_RAPAMYCIN_SENSITIVE_GENES	58	1.47684	7.45116	6.52131
GO:0090023 positive regulation of neutrophil chemotaxis	11	1.77534	7.42586	6.49383
KINSEY_TARGETS_OF_EWSR1_FLII_FUSION_DN	169	1.32837	7.3945	6.45943
CHIARETTI_T_ALL_REFRACTORY_TO_THERAPY	18	1.6703	7.3723	6.43543
GO:0071624 positive regulation of granulocyte chemotaxis	11	1.7662	7.34943	6.41064
GO:0034694 response to prostaglandin	10	1.78284	7.32035	6.37874
GO:0051491 positive regulation of filopodium assembly	11	1.75973	7.29523	6.35133
GO:1903020 positive regulation of glycoprotein metabolic process	10	1.77713	7.27365	6.32794
GO:0051208 sequestering of calcium ion	15	1.68995	7.2285	6.27755
GAUSSMANN_MLL_AF4_FUSION_TARGETS_C_UP	114	1.36676	7.21219	6.26012
GO:0071622 regulation of granulocyte chemotaxis	12	1.73051	7.19795	6.24507
GO:0002407 dendritic cell chemotaxis	11	1.74765	7.19357	6.2413
GO:0090022 regulation of neutrophil chemotaxis	12	1.72781	7.17469	6.22088
WORSCHECH_TUMOR_EVASION_AND_TOLEROGENICITY_UP	11	1.74499	7.17109	6.21799
BIOCARTA_ETC_PATHWAY	12	1.72251	7.12879	6.17068
geneCluster.144	22	2.17873	6.57659	6.16119
GO:0043552 positive regulation of phosphatidylinositol 3-kinase activity	18	1.64271	7.10593	6.14564
KYNG_RESPONSE_TO_H2O2_VIA_ERCC6	12	1.71798	7.08945	6.12791
GO:0070542 response to fatty acid	30	1.55201	7.08482	6.12379
ONO_AML1_TARGETS_DN	23	1.59558	7.07041	6.10842
GO:0070098 chemokine-mediated signaling pathway	11	1.73002	7.04428	6.08074
GO:1902624 positive regulation of neutrophil migration	13	1.69727	7.04489	6.08074
GO:0002920 regulation of humoral immune response	13	1.69495	7.02425	6.05886
GO:0090218 positive regulation of lipid kinase activity	19	1.62285	7.00664	6.03975
GO:0032588 trans-Golgi network membrane	30	1.54379	6.99187	6.02388
GO:0050857 positive regulation of antigen receptor-mediated signaling pathway	11	1.72343	6.98819	6.02081
GO:0034067 protein localization to Golgi apparatus	31	1.53499	6.95182	5.98
GO:0036336 dendritic cell migration	13	1.68058	6.89585	5.91644
RIGGI_EWING_SARCOMA_PROGENITOR_UP	171	1.30112	6.87825	5.89723
GO:1902622 regulation of neutrophil migration	14	1.66405	6.87139	5.89044
PASQUALUCCI_LYMPHOMA_BY_GC_STAGE_UP	180	1.29492	6.86461	5.88373
geneCluster.62	665	1.29307	6.29669	5.87824
HOFFMANN_IMMATURE_TO_MATURE_B_LYMPHOCYTE_UP	21	1.58957	6.84623	5.86358
SANSOM_APC_MYC_TARGETS	163	1.3035	6.82117	5.83565
LUI_THYROID_CANCER_CLUSTER_3	27	1.54441	6.80767	5.82111
THUM_SYSTOLIC_HEART_FAILURE_DN	170	1.2973	6.78795	5.79934
GO:0032947 protein complex scaffold	37	1.49288	6.77859	5.7896
BASAKI_YBX1_TARGETS_DN	247	1.2584	6.77145	5.78241
GO:0045061 thymic T cell selection	13	1.66637	6.76801	5.77954
GO:0019082 viral protein processing	10	1.71283	6.74014	5.74823
KUROZUMI_RESPONSE_TO_ONCOCYTIC_VIRUS	16	1.62579	6.73874	5.74771
GO:0010559 regulation of glycoprotein biosynthetic process	20	1.5872	6.73726	5.74709
GO:0032592 integral component of mitochondrial membrane	40	1.47779	6.73537	5.74598
GO:0006448 regulation of translational elongation	18	1.60416	6.72761	5.73804
ONO_FOXP3_TARGETS_DN	26	1.53917	6.68287	5.687
GO:1903018 regulation of glycoprotein metabolic process	21	1.56955	6.63899	5.63687
geneCluster.142	7	2.36765	6.04592	5.62482
GO:0098573 intrinsic component of mitochondrial membrane	41	1.46546	6.62508	5.6217
BREDEMEYER_RAG_SIGNALING_VIA_ATM_NOT_VIA_NFKB_UP	29	1.51538	6.60688	5.60149
WANG_RESPONSE_TO_GSK3_INHIBITOR_SB216763_UP	289	1.23675	6.60383	5.599
GO:0030669 clathrin-coated endocytic vesicle membrane	24	1.54435	6.60052	5.5962
VILIMAS_NOTCH1_TARGETS_UP	28	1.51982	6.5961	5.59209
GO:0030593 neutrophil chemotaxis	29	1.51117	6.55867	5.54932
GO:0071621 granulocyte chemotaxis	29	1.51081	6.55454	5.54554
REACTOME_IMMUNOREGULATORY_INTERACTIONS_BETWEEN_A_LYMPHOID_AND_A_NON_LYMPHOID_CELL	27	1.51985	6.53308	5.52144
GO:0002673 regulation of acute inflammatory response	17	1.59174	6.50888	5.49408
GO:0003746 translation elongation factor activity	13	1.63543	6.48658	5.46893
GO:1903727 positive regulation of phospholipid metabolic process	24	1.5312	6.4574	5.43564
GO:0051489 regulation of filopodium assembly	18	1.5756	6.44234	5.41895
GO:0002690 positive regulation of leukocyte chemotaxis	25	1.52207	6.42615	5.40092
GO:0006891 intra-Golgi vesicle-mediated transport	43	1.44239	6.41402	5.38765
MCLACHLAN_DENTAL_CARIES_UP	127	1.30918	6.40759	5.38111
GO:0008528 G-protein coupled peptide receptor activity	19	1.56202	6.39341	5.3654
GO:0001653 peptide receptor activity	19	1.56134	6.38647	5.35824
LUI_TARGETS_OF_PAX8_PPARG_FUSION	32	1.48124	6.3791	5.35057
HADDAD_T_LYMPHOCYTE_AND_NK_PROGENITOR_DN	22	1.53683	6.37217	5.3434
GO:0008201 heparin binding	27	1.5055	6.37079	5.34279
GO:1990266 neutrophil migration	33	1.47589	6.36805	5.34057
CHUNG_BLISTER_CYTOTOXICITY_DN	33	1.47445	6.3507	5.32108
GO:0050706 regulation of interleukin-1 beta secretion	16	1.58516	6.34529	5.31568
GO:0097028 dendritic cell differentiation	19	1.55438	6.31495	5.28078
GO:0045334 clathrin-coated endocytic vesicle	29	1.48957	6.30874	5.27443
GO:0032735 positive regulation of interleukin-12 production	17	1.57115	6.30463	5.27056
GO:0012507 ER to Golgi transport vesicle membrane	33	1.46886	6.283	5.24591
GO:0043551 regulation of phosphatidylinositol 3-kinase activity	24	1.5129	6.25629	5.2152
REACTOME_INFLAMMASOMES	11	1.63825	6.24783	5.20615
geneCluster.141	8	2.16267	5.61875	5.17996
GO:0050704 regulation of interleukin-1 secretion	17	1.56143	6.20734	5.15896
GO:0002437 inflammatory response to antigenic stimulus	21	1.52715	6.19232	5.14206
GO:0001954 positive regulation of cell-matrix adhesion	18	1.55048	6.18763	5.13746
UROSEVIC_RESPONSE_TO_IMIQUIMOD	16	1.56817	6.17819	5.1272
REACTOME_PEPTIDE_LIGAND_BINDING_RECEPTORS	19	1.5402	6.16834	5.11643
GO:0051238 sequestering of metal ion	23	1.50978	6.15206	5.09798
GO:0050702 interleukin-1 beta secretion	18	1.54406	6.12194	5.06296
GO:0002688 regulation of leukocyte chemotaxis	29	1.46721	6.04625	4.97318
GO:0043243 positive regulation of protein complex disassembly	14	1.57115	5.99959	4.91801
ONO_AML1_TARGETS_DN	23	1.49379	5.97558	4.89003
KIM_GLIS2_TARGETS_UP	29	1.45887	5.94737	4.85693
GO:0090630 activation of GTPase activity	22	1.49681	5.93841	4.84708
GO:0072676 lymphocyte migration	22	1.49457	5.91375	4.81822
geneCluster.143	7	2.06964	5.2589	4.81344
geneCluster.134	11	1.95472	5.25459	4.81344
LI_INDUCED_T_TO_NATURAL_KILLER_DN	63	1.35414	5.84786	4.73915
PILON_KLF1_TARGETS_UP	260	1.2147	5.82672	4.71439
GO:0033158 regulation of protein import into nucleus, translocation	11	1.59108	5.82409	4.7122
GO:0050701 interleukin-1 secretion	20	1.49946	5.81846	4.70633
GO:0002792 negative regulation of peptide secretion	15	1.54096	5.80926	4.69611
NGO_MALIGNANT_GLIOMA_1P_LOH	16	1.53049	5.80163	4.68778
MCLACHLAN_DENTAL_CARIES_DN	117	1.28494	5.79462	4.68022
GO:0032651 regulation of interleukin-1 beta production	25	1.46493	5.78133	4.66497
GO:0002687 positive regulation of leukocyte migration	35	1.41986	5.7727	4.6554
TIEN_INTESTINE_PROBIOTICS_2HR_UP	18	1.50779	5.74594	4.62461
GO:0030134 ER to Golgi transport vesicle	40	1.40111	5.74667	4.62461
GO:0042276 error-prone translesion synthesis	19	1.4989	5.73396	4.61286
GO:0032655 regulation of interleukin-12 production	26	1.45559	5.73451	4.61286
WIERENGA_STAT5A_TARGETS_GROUP2	29	1.44107	5.73412	4.61286
GO:0032615 interleukin-12 production	27	1.44798	5.70418	4.57728
CHANDRAN_METASTASIS_UP	165	1.24738	5.68876	4.55931
MORI_MATURE_B_LYMPHOCYTE_UP	81	1.31629	5.68498	4.55563
KEGG_CARDIAC_MUSCLE_CONTRACTION	37	1.40435	5.6626	4.52905
GO:0002690 positive regulation of leukocyte chemotaxis	25	1.45446	5.66036	4.52727
GO:0009250 glucan biosynthetic process	32	1.42199	5.65586	4.52269
GO:0046847 filopodium assembly	25	1.45378	5.65243	4.51942
GO:0050856 regulation of T cell receptor signaling pathway	22	1.46991	5.64031	4.50544
GO:0005978 glycogen biosynthetic process	32	1.42021	5.63368	4.49821
ALK_DN.V1_UP	31	1.42401	5.63091	4.49574
GO:0070987 error-free translesion synthesis	19	1.48763	5.61334	4.47501
GO:0045429 positive regulation of nitric oxide biosynthetic process	15	1.51967	5.59651	4.45515
GO:1904407 positive regulation of nitric oxide metabolic process	15	1.51921	5.59194	4.45045
GO:0043550 regulation of lipid kinase activity	31	1.41901	5.56887	4.42282
GO:0045058 T cell selection	22	1.46118	5.54236	4.39259
LEE_EARLY_T_LYMPHOCYTE_DN	41	1.38289	5.54222	4.39259
PTEN_DN.V1_DN	49	1.36227	5.54335	4.39259
GO:0097530 granulocyte migration	34	1.40377	5.52087	4.36701
geneCluster.51	46	1.54567	4.8257	4.35878
GO:0005771 multivesicular body	16	1.50224	5.51331	4.35859
GO:0032652 regulation of interleukin-1 production	27	1.43188	5.51259	4.35859
GAURNIER_PSMD4_TARGETS	30	1.4185	5.51159	4.35828
GO:2000107 negative regulation of leukocyte apoptotic process	23	1.45078	5.49105	4.33364
BILANGES_SERUM_RESPONSE_TRANSLATION	23	1.45029	5.48544	4.32758
GO:0019955 cytokine binding	33	1.40414	5.47912	4.32063
GO:0032611 interleukin-1 beta production	29	1.41942	5.47087	4.31126
GO:0007220 Notch receptor processing	16	1.49758	5.4653	4.30615
JIANG_HYPOXIA_VIA_VHL	30	1.41478	5.46565	4.30615
GO:0097530 granulocyte migration	34	1.39878	5.45674	4.29639
CHNG_MULTIPLE_MYELOMA_HYPERPLOID_UP	46	1.36141	5.42891	4.26252
geneCluster.146	11	1.79041	4.70793	4.24274
REACTOME_CELL_SURFACE_INTERACTIONS_AT_THE_VASCULAR_WALL	44	1.36496	5.40797	4.23722
KEGG_PPAR_SIGNALING_PATHWAY	26	1.42748	5.40279	4.23163
geneCluster.28	97	1.40041	4.68376	4.22901
KIM_LRRC3B_TARGETS	17	1.48244	5.39473	4.22243
GO:0050921 positive regulation of chemotaxis	39	1.37678	5.38045	4.20542
WIELAND_UP_BY_HBV_INFECTION	63	1.3234	5.37249	4.19634
GO:0030593 neutrophil chemotaxis	29	1.41119	5.36956	4.19356
GO:0071621 granulocyte chemotaxis	29	1.41097	5.36687	4.19109
BEIER_GLIOMA_STEM_CELL_DN	44	1.36175	5.3631	4.18726
GO:0000271 polysaccharide biosynthetic process	41	1.3693	5.35682	4.18026
LUI_THYROID_CANCER_PAX8_PPARG_DN	41	1.36863	5.34764	4.17023
GO:0006637 acyl-CoA metabolic process	49	1.34869	5.34742	4.17023
GO:0035383 thioester metabolic process	49	1.34823	5.34078	4.16278
GO:0048520 positive regulation of behavior	42	1.36495	5.33461	4.15589
geneCluster.138	5	1.91939	4.5959	4.14476
GO:1903428 positive regulation of reactive oxygen species biosynthetic process	20	1.45318	5.31233	4.12959
REACTOME_CLASS_A1_RHODOPSIN_LIKE_RECEPTORS	40	1.36886	5.31238	4.12959
geneCluster.44	148	1.32599	4.56324	4.12067
GO:1903725 regulation of phospholipid metabolic process	35	1.38069	5.2659	4.07175
SHIPP_DLBCL_VS_FOLLICULAR_LYMPHOMA_UP	36	1.37715	5.26201	4.06772
geneCluster.145	7	1.81391	4.48238	4.0432
GO:0033692 cellular polysaccharide biosynthetic process	36	1.37496	5.23282	4.03154
geneCluster.137	16	1.64882	4.44071	4.00839
GO:0070229 negative regulation of lymphocyte apoptotic process	14	1.38368	5.20358	3.99521
MOREIRA_RESPONSE_TO_TSA_UP	25	1.32514	5.19945	3.99084
GO:0051897 positive regulation of protein kinase B signaling	32	1.38494	5.18625	3.97489
ABE_INNER_EAR	28	1.40013	5.18054	3.96851
GO:0009988 cell-cell recognition	25	1.41317	5.17384	3.96083
GO:0031526 brush border membrane	16	1.46718	5.14777	3.92836
GO:0071353 cellular response to interleukin-4	21	1.43214	5.14526	3.92604
GO:0004896 cytokine receptor activity	35	1.371	5.13769	3.91723
NAKAJIMA_MAST_CELL	17	1.45783	5.13247	3.91143
GRAHAM_CML_DIVIDING_VS_NORMAL_QUIESCENT_DN	54	1.32312	5.12085	3.8974
GO:0045428 regulation of nitric oxide biosynthetic process	21	1.42933	5.11311	3.88834
GO:0005539 glycosaminoglycan binding	39	1.35599	5.09714	3.8687
GO:0032612 interleukin-1 production	32	1.37488	5.05605	3.81655
GO:0030665 clathrin-coated vesicle membrane	40	1.34916	5.04052	3.79734
GO:0022627 cytosolic small ribosomal subunit	33	1.29819	5.02237	3.77471
ALTEMEIER_RESPONSE_TO_LPS_WITH_MECHANICAL_VENTILATION	53	1.31846	5.0209	3.7737
GO:0002526 acute inflammatory response	33	1.3679	5.00981	3.7602
geneCluster.132	20	1.55593	4.19987	3.7538
GO:0070542 response to fatty acid	30	1.37702	4.98982	3.73508
GO:0002688 regulation of leukocyte chemotaxis	29	1.38015	4.98095	3.72443
LEE_LIVER_CANCER_CIPROFIBRATE_UP	24	1.40169	4.97776	3.72116
WILENSKY_RESPONSE_TO_DARAPLADIB	17	1.36064	4.93625	3.66779
GO:0043022 ribosome binding	36	1.28932	4.92755	3.65729
KEGG_INTESTINAL_IMMUNE_NETWORK_FOR_IGA_PRODUCTION	24	1.32634	4.91888	3.64683
GO:0070670 response to interleukin-4	23	1.40106	4.91075	3.63705
GO:0008180 COP9 signalosome	26	1.38636	4.90369	3.62866
GO:0097529 myeloid leukocyte migration	50	1.31616	4.89726	3.62111
GO:0030658 transport vesicle membrane	50	1.3158	4.89189	3.61494
GO:0032965 regulation of collagen biosynthetic process	10	1.4166	4.88253	3.60351
MENSSEN_MYC_TARGETS	48	1.31857	4.8723	3.59091
DIRMEIER_LMP1_RESPONSE_EARLY	56	1.30291	4.8648	3.58191
GO:1990266 neutrophil migration	33	1.35679	4.86275	3.5801
TOMIDA_METASTASIS_UP	17	1.43206	4.85249	3.56745
GO:0043368 positive T cell selection	15	1.37171	4.84869	3.56331
PHONG_TNF_TARGETS_UP	34	1.35248	4.84788	3.56314
GO:0050729 positive regulation of inflammatory response	32	1.35731	4.82568	3.53463
BILBAN_B_CLL_LPL_DN	32	1.29786	4.82113	3.52948
geneCluster.125	31	1.44892	3.9863	3.52754
GO:0046888 negative regulation of hormone secretion	18	1.35187	4.80206	3.50505
GO:0000303 response to superoxide	16	1.43472	4.80064	3.50406
GO:0001825 blastocyst formation	20	1.34131	4.79732	3.50052
GO:0034637 cellular carbohydrate biosynthetic process	42	1.32678	4.79561	3.49913
YU_MYC_TARGETS_DN	39	1.33393	4.79005	3.49262
P53_DN.V2_DN	51	1.307	4.78766	3.49033
MORI_LARGE_PRE_BII_LYMPHOCYTE_DN	51	1.257	4.77312	3.47183
GO:0016814 hydrolase activity, acting on carbon-nitrogen (but not peptide) bonds, in cyclic amidines	22	1.33136	4.77243	3.47179
GO:0006073 cellular glucan metabolic process	46	1.31599	4.77087	3.4706
GO:0000974 Prp19 complex	13	1.38421	4.76267	3.46053
GO:0044042 glucan metabolic process	46	1.31531	4.7608	3.45891
GO:0050998 nitric-oxide synthase binding	10	1.49037	4.75593	3.45427
KYNG_RESPONSE_TO_H2O2_VIA_ERCC6_DN	37	1.33689	4.7558	3.45427
GO:0005977 glycogen metabolic process	46	1.31495	4.75536	3.45427
GO:0050795 regulation of behavior	62	1.24074	4.74155	3.43669
LENAOUR_DENDRITIC_CELL_MATURATION_UP	59	1.28952	4.73071	3.42313
LEF1_UP.V1_UP	63	1.28342	4.73013	3.42313
GO:0002828 regulation of type 2 immune response	11	1.47492	4.72794	3.42106
MCLACHLAN_DENTAL_CARIES_UP	127	1.22355	4.72443	3.41722
GO:1902583 multi-organism intracellular transport	28	1.36363	4.72091	3.41337
GO:0016064 immunoglobulin mediated immune response	51	1.3026	4.72019	3.41326
GO:0075733 intracellular transport of virus	28	1.36347	4.71882	3.41228
GO:0048520 positive regulation of behavior	42	1.27159	4.71578	3.40906
JIANG_AGING_HYPOTHALAMUS_DN	25	1.37519	4.71106	3.40359
SHEPARD_BMYB_TARGETS	26	1.31369	4.71031	3.40344
GO:0010939 regulation of necrotic cell death	25	1.37458	4.70349	3.39514
GO:0060334 regulation of interferon-gamma-mediated signaling pathway	20	1.39908	4.69719	3.38754
GO:0045061 thymic T cell selection	13	1.45041	4.69549	3.38609
GO:0061418 regulation of transcription from RNA polymerase II promoter in response to hypoxia	26	1.31308	4.69248	3.38289
GO:0090022 regulation of neutrophil chemotaxis	12	1.46005	4.69115	3.38196
GO:0071622 regulation of granulocyte chemotaxis	12	1.45949	4.68546	3.37515
NAKAMURA_ADIPOGENESIS_LATE_UP	62	1.28202	4.68291	3.37256
GO:0046676 negative regulation of insulin secretion	14	1.43988	4.68121	3.37111
GO:0002577 regulation of antigen processing and presentation	10	1.48212	4.67686	3.3661
GO:0000305 response to oxygen radical	17	1.41588	4.67366	3.36429
GO:0019724 B cell mediated immunity	53	1.29599	4.67421	3.36429
GO:0031100 organ regeneration	33	1.29099	4.6739	3.36429
GO:0090278 negative regulation of peptide hormone secretion	14	1.4389	4.67084	3.36215
PID_HNF3BPATHWAY	16	1.42285	4.67138	3.36215
XU_CREBBP_TARGETS_DN	37	1.33016	4.66201	3.35131
GO:0002495 antigen processing and presentation of peptide antigen via MHC class II	68	1.23158	4.66157	3.35131
GO:0090023 positive regulation of neutrophil chemotaxis	11	1.46799	4.65974	3.34966
GO:0071624 positive regulation of granulocyte chemotaxis	11	1.46786	4.65843	3.34873
GO:0002504 antigen processing and presentation of peptide or polysaccharide antigen via MHC class II	68	1.23136	4.65403	3.34361
GARY_CD5_TARGETS_UP	402	1.12173	4.63234	3.31518
LU_IL4_SIGNALING	73	1.22526	4.62727	3.30915
GO:0044246 regulation of multicellular organismal metabolic process	12	1.38681	4.62587	3.30807
GO:0001659 temperature homeostasis	10	1.40626	4.61939	3.30013
GO:0006809 nitric oxide biosynthetic process	24	1.37185	4.61456	3.29441
SATO_SILENCED_BY_DEACETYLATION_IN_PANCREATIC_CANCER	16	1.35618	4.60802	3.28636
GO:0060330 regulation of response to interferon-gamma	21	1.38582	4.60596	3.28438
PECE_MAMMARY_STEM_CELL_DN	103	1.23411	4.60281	3.28093
HU_GENOTOXIN_ACTION_DIRECT_VS_INDIRECT_4HR	25	1.36613	4.59818	3.27547
GO:0035872 nucleotide-binding domain, leucine rich repeat containing receptor signaling pathway	45	1.26186	4.59529	3.27235
REACTOME_NUCLEOTIDE_BINDING_DOMAIN_LEUCINE_RICH_REPEAT_CONTAINING_RECEPTOR_NLR_SIGNALING_PATHWAYS	35	1.33073	4.59203	3.26874
GO:1902253 regulation of intrinsic apoptotic signaling pathway by p53 class mediator	14	1.36871	4.58844	3.26467
LUI_TARGETS_OF_PAX8_PPARG_FUSION	32	1.29016	4.58313	3.25826
SYED_ESTRADIOL_RESPONSE	15	1.42229	4.58202	3.25756
GO:0031294 lymphocyte costimulation	41	1.31435	4.58131	3.25739
GO:0045620 negative regulation of lymphocyte differentiation	19	1.33767	4.57617	3.2512
GO:0006959 humoral immune response	55	1.28626	4.57476	3.25008
GO:0046794 transport of virus	29	1.3483	4.57033	3.24486
GO:1902579 multi-organism localization	30	1.34463	4.5682	3.24355
KEGG_NOD_LIKE_RECEPTOR_SIGNALING_PATHWAY	38	1.27481	4.56851	3.24355
GO:0044766 multi-organism transport	30	1.34443	4.5655	3.24068
GO:0042769 DNA damage response, detection of DNA damage	31	1.34103	4.56493	3.24068
GO:0042605 peptide antigen binding	12	1.44697	4.5585	3.23273
KEGG_RETINOL_METABOLISM	13	1.43691	4.5555	3.23034
GO:0034198 cellular response to amino acid starvation	13	1.43686	4.55502	3.23034
GO:0060338 regulation of type I interferon-mediated signaling pathway	23	1.37165	4.55537	3.23034
GO:0032609 interferon-gamma production	42	1.2658	4.55223	3.22872
KEGG_CELL_ADHESION_MOLECULES_CAMS	45	1.2602	4.55317	3.22872
GO:0060402 calcium ion transport into cytosol	48	1.25495	4.55212	3.22872
GO:0060401 cytosolic calcium ion transport	48	1.25492	4.55125	3.22831
NIELSEN_SYNOVIAL_SARCOMA_DN	15	1.41926	4.54921	3.22631
ICHIBA_GRAFT_VERSUS_HOST_DISEASE_35D_UP	72	1.22345	4.54203	3.21731
GO:0031295 T cell costimulation	41	1.31136	4.53765	3.21212
GO:0070374 positive regulation of ERK1 and ERK2 cascade	49	1.25257	4.53408	3.20802
LUI_THYROID_CANCER_CLUSTER_3	27	1.35205	4.52266	3.19321
GO:1903409 reactive oxygen species biosynthetic process	39	1.2706	4.52207	3.19317
GO:0032196 transposition	11	1.45365	4.51735	3.18822
GO:0035774 positive regulation of insulin secretion involved in cellular response to glucose stimulus	10	1.39995	4.51731	3.18822
GO:0016790 thiolester hydrolase activity	18	1.33927	4.51003	3.17903
GO:0002020 protease binding	60	1.2743	4.5075	3.17634
KYNG_RESPONSE_TO_H2O2	49	1.29237	4.50437	3.17281
GO:0030595 leukocyte chemotaxis	60	1.23539	4.4992	3.16651
GO:0001914 regulation of T cell mediated cytotoxicity	12	1.37889	4.49325	3.16037
GO:0048146 positive regulation of fibroblast proliferation	24	1.31136	4.49305	3.16037
GO:0070423 nucleotide-binding oligomerization domain containing signaling pathway	32	1.28594	4.4934	3.16037
GO:0048521 negative regulation of behavior	11	1.45085	4.48936	3.15606
BILBAN_B_CLL_LPL_UP	62	1.23244	4.48772	3.15457
LUI_THYROID_CANCER_PAX8_PPARG_DN	41	1.3077	4.48416	3.15044
GO:0010712 regulation of collagen metabolic process	11	1.38715	4.48028	3.14589
GO:1902230 negative regulation of intrinsic apoptotic signaling pathway in response to DNA damage	16	1.34881	4.47856	3.14431
GO:0050921 positive regulation of chemotaxis	39	1.31205	4.47804	3.14431
SENGUPTA_NASOPHARYNGEAL_CARCINOMA_WITH_LMP1_DN	40	1.30948	4.47583	3.14203
KEGG_GRAFT_VERSUS_HOST_DISEASE	15	1.41238	4.47428	3.14065
GO:0006693 prostaglandin metabolic process	11	1.44828	4.46355	3.12667
GO:0006692 prostanoid metabolic process	11	1.44815	4.46224	3.12586
IIZUKA_LIVER_CANCER_PROGRESSION_L0_L1_DN	18	1.39063	4.46188	3.12586
GO:0030512 negative regulation of transforming growth factor beta receptor signaling pathway	45	1.25601	4.45947	3.12403
LI_AMPLIFIED_IN_LUNG_CANCER	113	1.18922	4.45993	3.12403
GO:1903845 negative regulation of cellular response to transforming growth factor beta stimulus	45	1.25582	4.45561	3.11947
GO:0001540 beta-amyloid binding	16	1.40318	4.45429	3.1184
RHODES_CANCER_META_SIGNATURE	53	1.24271	4.44977	3.11292
GO:0032649 regulation of interferon-gamma production	36	1.31735	4.44382	3.10547
GO:1901570 fatty acid derivative biosynthetic process	19	1.32931	4.43198	3.08991
NAGASHIMA_NRG1_SIGNALING_UP	100	1.19612	4.42791	3.08503
GO:0005976 polysaccharide metabolic process	56	1.27548	4.42717	3.08475
TSUNODA_CISPLATIN_RESISTANCE_DN	20	1.32415	4.42625	3.08422
LINDSTEDT_DENDRITIC_CELL_MATURATION_C	45	1.29492	4.42339	3.08157
GO:0050920 regulation of chemotaxis	52	1.28181	4.42327	3.08157
GO:0031529 ruffle organization	32	1.32708	4.4194	3.07768
GUTIERREZ_CHRONIC_LYMPHOCYTIC_LEUKEMIA_DN	55	1.23847	4.41978	3.07768
DIRMEIER_LMP1_RESPONSE_LATE_DN	25	1.35176	4.41708	3.07521
GO:0001913 T cell mediated cytotoxicity	16	1.34465	4.41586	3.07425
GO:0046209 nitric oxide metabolic process	34	1.27657	4.41394	3.07232
GO:0061178 regulation of insulin secretion involved in cellular response to glucose stimulus	20	1.37447	4.40748	3.06413
GO:2000107 negative regulation of leukocyte apoptotic process	23	1.31006	4.40597	3.06347
LIN_MELANOMA_COPY_NUMBER_DN	38	1.30953	4.40601	3.06347
GO:0051354 negative regulation of oxidoreductase activity	12	1.37247	4.40366	3.06101
KEGG_TYPE_I_DIABETES_MELLITUS	17	1.39166	4.40111	3.0582
GO:0046456 icosanoid biosynthetic process	19	1.32711	4.39848	3.05529
GO:0050853 B cell receptor signaling pathway	35	1.31672	4.39658	3.05337
GO:0090322 regulation of superoxide metabolic process	11	1.3807	4.3937	3.0501
GO:0019985 translesion synthesis	43	1.29679	4.38847	3.04401
NAKAMURA_TUMOR_ZONE_PERIPHERAL_VS_CENTRAL_DN	403	1.11663	4.38826	3.04401
geneCluster.23	172	1.2034	3.54691	3.04347
GO:0051282 regulation of sequestering of calcium ion	40	1.30305	4.38196	3.036
GO:0050854 regulation of antigen receptor-mediated signaling pathway	30	1.33042	4.37853	3.032
HOFFMANN_SMALL_PRE_BII_TO_IMMATURE_B_LYMPHOCYTE_UP	41	1.30049	4.37805	3.032
MARSON_FOXP3_CORE_DIRECT_TARGETS	15	1.40355	4.37751	3.03195
MILI_PSEUDOPODIA_CHEMOTAXIS_DN	343	1.1239	4.37695	3.03188
GO:0042288 MHC class I protein binding	12	1.37026	4.37496	3.02983
KEGG_AUTOIMMUNE_THYROID_DISEASE	16	1.39565	4.37012	3.02383
GO:0015294 solute:cation symporter activity	37	1.30924	4.36559	3.01868
GO:0002685 regulation of leukocyte migration	51	1.27988	4.36539	3.01868
GO:0010811 positive regulation of cell-substrate adhesion	41	1.25829	4.36015	3.01212
GO:0042092 type 2 immune response	14	1.40889	4.35039	2.99926
GO:0006970 response to osmotic stress	37	1.26562	4.34398	2.99106
ADDYA_ERYTHROID_DIFFERENTIATION_BY_HEMIN	38	1.30483	4.33809	2.98356
WANG_ESOPHAGUS_CANCER_VS_NORMAL_UP	62	1.26119	4.33587	2.98116
GO:1902622 regulation of neutrophil migration	14	1.40719	4.33191	2.97635
GO:0071357 cellular response to type I interferon	56	1.23171	4.31187	2.94908
GO:0000060 protein import into nucleus, translocation	28	1.33218	4.31131	2.949
GO:0035091 phosphatidylinositol binding	124	1.20563	4.3083	2.94549
DAUER_STAT3_TARGETS_UP	23	1.30321	4.30265	2.93899
GO:0030666 endocytic vesicle membrane	71	1.21414	4.30293	2.93899
GO:1902624 positive regulation of neutrophil migration	13	1.41233	4.29653	2.93111
IL15_UP.V1_DN	46	1.24568	4.29591	2.93095
BANDRES_RESPONSE_TO_CARMUSTIN_WITHOUT_MGMT_48HR_UP	12	1.42085	4.28924	2.92253
MCLACHLAN_DENTAL_CARIES_DN	117	1.20891	4.28891	2.92253
NOUZOVA_METHYLATED_IN_APL	30	1.27916	4.28372	2.91594
POMEROY_MEDULLOBLASTOMA_DESMOPLASIC_VS_CLASSIC_DN	31	1.31927	4.27044	2.89798
KEGG_ALLOGRAFT_REJECTION	17	1.37997	4.26737	2.89436
HUANG_FOXA2_TARGETS_DN	12	1.36132	4.266	2.89313
GO:0051209 release of sequestered calcium ion into cytosol	39	1.29745	4.26538	2.89295
VISALA_RESPONSE_TO_HEAT_SHOCK_AND_AGING_DN	13	1.40929	4.26408	2.89181
GO:0051283 negative regulation of sequestering of calcium ion	39	1.29733	4.26357	2.8918
GO:2001057 reactive nitrogen species metabolic process	35	1.26456	4.25274	2.87757
GOZGIT_ESR1_TARGETS_DN	339	1.12102	4.25249	2.87757
KEGG_CELL_ADHESION_MOLECULES_CAMS	45	1.24475	4.25064	2.87566
GO:0044264 cellular polysaccharide metabolic process	51	1.27263	4.24991	2.87531
GO:0001783 B cell apoptotic process	17	1.3782	4.24696	2.87184
WATANABE_COLON_CANCER_MSI_VS_MSS_UP	12	1.41673	4.24627	2.87156
GO:0002455 humoral immune response mediated by circulating immunoglobulin	14	1.34434	4.24318	2.86789
GO:0060337 type I interferon signaling pathway	56	1.22796	4.24221	2.8672
GO:1903426 regulation of reactive oxygen species biosynthetic process	31	1.3171	4.24072	2.86578
GO:1902254 negative regulation of intrinsic apoptotic signaling pathway by p53 class mediator	12	1.41465	4.22445	2.84348
GO:0046640 regulation of alpha-beta T cell proliferation	15	1.33616	4.22353	2.84287
HELLEBREKERS_SILENCED_DURING_TUMOR_ANGIOGENESIS	27	1.28385	4.22252	2.84212
LIAO_METASTASIS	348	1.13772	4.21824	2.83674
GO:0001952 regulation of cell-matrix adhesion	42	1.28748	4.21629	2.83467
HERNANDEZ_ABERRANT_MITOSIS_BY_DOCETACEL_2NM_DN	13	1.40468	4.21472	2.83312
GO:0002720 positive regulation of cytokine production involved in immune response	13	1.40452	4.21307	2.83146
GO:0016651 oxidoreductase activity, acting on NAD(P)H	71	1.24283	4.20991	2.82767
geneCluster.11	159	1.19136	3.34243	2.82074
GO:0008037 cell recognition	41	1.2487	4.19793	2.81134
SANA_RESPONSE_TO_IFNG_DN	63	1.21704	4.19653	2.81004
MALONEY_RESPONSE_TO_17AAG_UP	28	1.32346	4.19513	2.80873
GO:0032964 collagen biosynthetic process	13	1.34719	4.19301	2.80708
GO:0035773 insulin secretion involved in cellular response to glucose stimulus	23	1.34256	4.19344	2.80708
GO:0043516 regulation of DNA damage response, signal transduction by p53 class mediator	17	1.32187	4.19039	2.80403
GO:0090288 negative regulation of cellular response to growth factor stimulus	59	1.22107	4.18548	2.79771
geneCluster.99	55	1.27811	3.30819	2.79334
GO:0023026 MHC class II protein complex binding	14	1.39334	4.18076	2.7921
GO:0042116 macrophage activation	20	1.30655	4.18058	2.7921
GO:0023023 MHC protein complex binding	14	1.39298	4.17683	2.78743
GO:0019068 virion assembly	31	1.31181	4.16777	2.77519
GO:0048026 positive regulation of mRNA splicing, via spliceosome	12	1.3519	4.15904	2.7634
GO:0034340 response to type I interferon	57	1.22186	4.15604	2.75979
REACTOME_PTM_GAMMA_CARBOXYLATION_HYPUSINE_FORMATION_AND_ARYLSULFATASE_ACTIVATION	11	1.36001	4.15468	2.7588
ZHONG_SECRETOME_OF_LUNG_CANCER_AND_MACROPHAGE	55	1.22431	4.15441	2.7588
VALK_AML_CLUSTER_6	17	1.37003	4.15229	2.75644
GO:0002902 regulation of B cell apoptotic process	13	1.39859	4.14921	2.7527
geneCluster.100	33	1.31892	3.25066	2.73886
geneCluster.29	60	1.26046	3.23113	2.73886
geneCluster.87	116	1.20631	3.24022	2.73886
GO:0006636 unsaturated fatty acid biosynthetic process	23	1.29099	4.13499	2.73368
GO:0050707 regulation of cytokine secretion	56	1.22193	4.13541	2.73368
GO:0003725 double-stranded RNA binding	50	1.22989	4.13256	2.73087
HASLINGER_B_CLL_WITH_MUTATED_VH_GENES	16	1.37443	4.12955	2.72729
GO:0019886 antigen processing and presentation of exogenous peptide antigen via MHC class II	65	1.24529	4.12913	2.72729
GO:0050839 cell adhesion molecule binding	64	1.24646	4.128	2.72633
GO:0050858 negative regulation of antigen receptor-mediated signaling pathway	16	1.37421	4.12712	2.72574
geneCluster.90	51	1.27201	3.20766	2.7227
SENGUPTA_NASOPHARYNGEAL_CARCINOMA_WITH_LMP1_UP	242	1.1332	4.12368	2.72147
GO:0045834 positive regulation of lipid metabolic process	52	1.22642	4.1219	2.71957
GO:0042287 MHC protein binding	17	1.36736	4.12122	2.71927
GO:0097300 programmed necrotic cell death	35	1.2555	4.11448	2.71024
TAKEDA_TARGETS_OF_NUP98_HOXA9_FUSION_8D_UP	54	1.2232	4.11298	2.70875
REACTOME_O_LINKED_GLYCOSYLATION_OF_MUCINS	18	1.31025	4.1107	2.70614
GO:0002687 positive regulation of leukocyte migration	35	1.29634	4.10632	2.70049
GO:0070266 necroptotic process	29	1.31331	4.10285	2.69615
GO:0006301 postreplication repair	51	1.22663	4.10209	2.69572
REACTOME_G_ALPHA_I_SIGNALLING_EVENTS	41	1.28131	4.09089	2.68023
GO:1903053 regulation of extracellular matrix organization	14	1.33028	4.0801	2.6653
GO:0032722 positive regulation of chemokine production	19	1.30252	4.07384	2.65691
REACTOME_GENERATION_OF_SECOND_MESSENGER_MOLECULES	13	1.33638	4.07168	2.65444
GO:0060612 adipose tissue development	17	1.31178	4.06844	2.65044
CAFFAREL_RESPONSE_TO_THC_DN	17	1.31175	4.06801	2.65044
GO:0051082 unfolded protein binding	76	1.19713	4.063	2.64385
GO:0045581 negative regulation of T cell differentiation	16	1.31636	4.05912	2.63888
DIAZ_CHRONIC_MEYLOGENOUS_LEUKEMIA_DN	67	1.20476	4.05043	2.62692
GO:0050854 regulation of antigen receptor-mediated signaling pathway	30	1.26269	4.04495	2.61959
GO:1901681 sulfur compound binding	69	1.20243	4.0438	2.61859
GO:0048284 organelle fusion	90	1.18481	4.03329	2.60392
ZHANG_RESPONSE_TO_CANTHARIDIN_DN	62	1.20861	4.02671	2.59498
GREENBAUM_E2A_TARGETS_DN	15	1.3179	4.01079	2.57234
HILLION_HMGA1B_TARGETS	56	1.21437	4.00692	2.56734
GO:0006505 GPI anchor metabolic process	26	1.27074	4.00067	2.55883
GO:1902229 regulation of intrinsic apoptotic signaling pathway in response to DNA damage	20	1.29186	3.99666	2.5536
geneCluster.148	11	1.39322	3.04655	2.54747
GO:0002709 regulation of T cell mediated immunity	28	1.26364	3.98402	2.53577
GO:0070372 regulation of ERK1 and ERK2 cascade	80	1.1896	3.98364	2.53577
GO:0046933 proton-transporting ATP synthase activity, rotational mechanism	10	1.35276	3.98286	2.5356
GO:0015293 symporter activity	54	1.2154	3.98262	2.5356
WATTEL_AUTONOMOUS_THYROID_ADENOMA_UP	26	1.26865	3.97309	2.5222
GO:0015291 secondary active transmembrane transporter activity	95	1.17839	3.97204	2.52132
BURTON_ADIPOGENESIS_PEAK_AT_8HR	26	1.26841	3.97003	2.51902
GO:0005903 brush border	39	1.23738	3.96649	2.51444
KYNG_ENVIRONMENTAL_STRESS_RESPONSE_NOT_BY_4NQO_IN_OLD	11	1.34203	3.96562	2.51382
KYNG_NORMAL_AGING_UP	13	1.32607	3.95939	2.50526
GO:0061077 chaperone-mediated protein folding	38	1.23821	3.95068	2.49303
HILLION_HMGA1_TARGETS	53	1.21461	3.94871	2.49076
geneCluster.18	111	1.18563	2.98802	2.49031
geneCluster.75	110	1.18537	2.97841	2.48976
GO:0010543 regulation of platelet activation	13	1.32485	3.94617	2.48766
TIAN_BHLHA15_TARGETS	13	1.32272	3.92329	2.45427
POOLA_INVASIVE_BREAST_CANCER_UP	131	1.15731	3.92004	2.45008
BERTUCCI_INVASIVE_CARCINOMA_DUCTAL_VS_LOBULAR_UP	13	1.32211	3.9167	2.44575
SABATES_COLORECTAL_ADENOMA_DN	61	1.20301	3.91187	2.4392
GO:0051926 negative regulation of calcium ion transport	18	1.2935	3.91068	2.43809
GO:0035994 response to muscle stretch	11	1.33634	3.90711	2.43397
FOSTER_TOLERANT_MACROPHAGE_UP	81	1.18473	3.90703	2.43397
GO:0042119 neutrophil activation	13	1.32113	3.90619	2.43337
GO:0030890 positive regulation of B cell proliferation	24	1.26786	3.8814	2.39681
GO:0016266 O-glycan processing	21	1.27833	3.88004	2.39543
GAUSSMANN_MLL_AF4_FUSION_TARGETS_D_UP	17	1.29481	3.87046	2.38165
GO:0051896 regulation of protein kinase B signaling	57	1.20496	3.86992	2.38151
geneCluster.2	75	1.20167	2.86832	2.37214
GO:0002718 regulation of cytokine production involved in immune response	24	1.26601	3.85782	2.36387
geneCluster.150	9	1.37343	2.84311	2.3606
geneCluster.63	112	1.17171	2.84077	2.3606
GO:0044801 single-organism membrane fusion	93	1.1735	3.85123	2.35454
GO:0001961 positive regulation of cytokine-mediated signaling pathway	19	1.28396	3.8505	2.35412
GO:0002367 cytokine production involved in immune response	29	1.25029	3.84049	2.33958
geneCluster.43	117	1.16598	2.80706	2.33134
APPIERTO_RESPONSE_TO_FENRETINIDE_UP	21	1.27458	3.83418	2.33065
GO:0006801 superoxide metabolic process	28	1.25191	3.82718	2.32111
GO:0032480 negative regulation of type I interferon production	38	1.22976	3.82703	2.32111
GO:0030246 carbohydrate binding	107	1.16415	3.82563	2.31964
GO:0042554 superoxide anion generation	12	1.32038	3.82325	2.31669
REACTOME_FORMATION_OF_THE_TERNARY_COMPLEX_AND_SUBSEQUENTLY_THE_43S_COMPLEX	45	1.21754	3.81898	2.31084
GO:0008143 poly(A) binding	13	1.3129	3.81814	2.31023
GO:0001824 blastocyst development	45	1.21684	3.80832	2.29588
GO:0043244 regulation of protein complex disassembly	50	1.20976	3.80773	2.29565
GO:0042805 actinin binding	10	1.33509	3.80649	2.2951
GO:0042098 T cell proliferation	100	1.16704	3.80671	2.2951
TIEN_INTESTINE_PROBIOTICS_6HR_UP	45	1.21607	3.79643	2.28034
GNATENKO_PLATELET_SIGNATURE	32	1.23967	3.79409	2.27741
NIKOLSKY_BREAST_CANCER_17Q11_Q21_AMPLICON	55	1.2024	3.78962	2.27122
GO:2000379 positive regulation of reactive oxygen species metabolic process	40	1.22353	3.78795	2.26933
PENG_LEUCINE_DEPRIVATION_DN	165	1.13923	3.78465	2.26492
GO:0042059 negative regulation of epidermal growth factor receptor signaling pathway	32	1.23854	3.77839	2.25595
GO:1901185 negative regulation of ERBB signaling pathway	32	1.23849	3.77776	2.25564
geneCluster.41	126	1.15524	2.73339	2.25538
REACTOME_LYSOSOME_VESICLE_BIOGENESIS	18	1.28063	3.76002	2.22888
REACTOME_MHC_CLASS_II_ANTIGEN_PRESENTATION	65	1.18985	3.75592	2.2232
GO:0007006 mitochondrial membrane organization	78	1.17879	3.75525	2.22284
GO:0045058 T cell selection	22	1.26421	3.75115	2.21715
GO:0002753 cytoplasmic pattern recognition receptor signaling pathway	46	1.21152	3.74907	2.2146
GO:2000106 regulation of leukocyte apoptotic process	46	1.21148	3.74835	2.21415
REACTOME_GPCR_LIGAND_BINDING	61	1.19308	3.74393	2.20796
GO:0002440 production of molecular mediator of immune response	81	1.17576	3.74038	2.20312
GO:0042026 protein refolding	18	1.27831	3.73298	2.19305
GO:0046683 response to organophosphorus	61	1.19242	3.73264	2.19305
GO:0030176 integral component of endoplasmic reticulum membrane	87	1.1712	3.73262	2.19305
GO:0090101 negative regulation of transmembrane receptor protein serine/threonine kinase signaling pathway	54	1.19999	3.73121	2.19153
GO:0002756 MyD88-independent toll-like receptor signaling pathway	65	1.18802	3.72437	2.18152
GO:0035666 TRIF-dependent toll-like receptor signaling pathway	64	1.18892	3.72361	2.18101
BOYLAN_MULTIPLE_MYELOMA_D_UP	57	1.19574	3.71755	2.17221
DAZARD_UV_RESPONSE_CLUSTER_G1	53	1.20026	3.71634	2.17099
GO:0008361 regulation of cell size	78	1.17647	3.71294	2.16633
GO:0002717 positive regulation of natural killer cell mediated immunity	12	1.30969	3.71178	2.16586
GO:0070265 necrotic cell death	40	1.2184	3.71219	2.16586
geneCluster.84	50	1.20495	2.63519	2.1601
geneCluster.35	64	1.18916	2.64069	2.1601
HUTTMANN_B_CLL_POOR_SURVIVAL_DN	54	1.1983	3.70375	2.15393
GO:0032673 regulation of interleukin-4 production	14	1.29535	3.69655	2.14329
GO:0001937 negative regulation of endothelial cell proliferation	14	1.29512	3.69405	2.14003
MORI_IMMATURE_B_LYMPHOCYTE_UP	46	1.20778	3.69129	2.13636
GO:1903036 positive regulation of response to wounding	52	1.19987	3.6906	2.13594
GO:0032653 regulation of interleukin-10 production	19	1.27018	3.68704	2.13102
KYNG_WERNER_SYNDROM_UP	14	1.29424	3.68452	2.12839
GO:0060760 positive regulation of response to cytokine stimulus	20	1.26603	3.68459	2.12839
geneCluster.31	70	1.17929	2.59903	2.12738
NADLER_OBESITY_UP	41	1.21466	3.68121	2.12383
CHASSOT_SKIN_WOUND	10	1.32219	3.67854	2.12086
KEGG_LEISHMANIA_INFECTION	43	1.21134	3.67848	2.12086
GO:0048770 pigment granule	77	1.17511	3.67426	2.11486
KEGG_CYTOKINE_CYTOKINE_RECEPTOR_INTERACTION	68	1.18167	3.66125	2.09491
REACTOME_TRNA_AMINOACYLATION	38	1.21816	3.65826	2.09085
CAVARD_LIVER_CANCER_MALIGNANT_VS_BENIGN	12	1.30415	3.65411	2.08627
GO:1901797 negative regulation of signal transduction by p53 class mediator	18	1.27158	3.65443	2.08627
GO:0042470 melanosome	77	1.17402	3.65453	2.08627
GO:0015295 solute:proton symporter activity	16	1.28053	3.65164	2.08302
geneCluster.92	115	1.14429	2.53271	2.06858
geneCluster.86	118	1.14294	2.53343	2.06858
HENDRICKS_SMARCA4_TARGETS_DN	26	1.2432	3.64159	2.06767
GO:1901568 fatty acid derivative metabolic process	34	1.22445	3.64111	2.06758
GO:0036230 granulocyte activation	15	1.28465	3.64046	2.06721
GO:0006690 icosanoid metabolic process	34	1.22422	3.6378	2.06365
GO:0046633 alpha-beta T cell proliferation	18	1.26923	3.627	2.04704
GO:0031227 intrinsic component of endoplasmic reticulum membrane	89	1.16418	3.62337	2.0419
HAN_JNK_SINGALING_DN	15	1.283	3.62213	2.04059
GO:0032845 negative regulation of homeostatic process	71	1.17661	3.61676	2.03264
GO:0032613 interleukin-10 production	20	1.26002	3.61226	2.02608
GO:0061387 regulation of extent of cell growth	37	1.21618	3.60382	2.01315
KEGG_METABOLISM_OF_XENOBIOTICS_BY_CYTOCHROME_P450	17	1.27135	3.60085	2.00903
geneCluster.61	33	1.21329	2.46827	2.00227
GO:0036002 pre-mRNA binding	17	1.27075	3.59387	1.99842
GO:0006506 GPI anchor biosynthetic process	25	1.24205	3.59069	1.99396
GO:0042102 positive regulation of T cell proliferation	41	1.20849	3.58914	1.99213
FERRANDO_T_ALL_WITH_MLL_ENL_FUSION_UP	64	1.18097	3.5871	1.9895
GO:0044246 regulation of multicellular organismal metabolic process	12	1.29713	3.58082	1.98033
GO:0016875 ligase activity, forming carbon-oxygen bonds	36	1.21637	3.58061	1.98033
GO:0051279 regulation of release of sequestered calcium ion into cytosol	28	1.2332	3.57881	1.97809
GO:0016876 ligase activity, forming aminoacyl-tRNA and related compounds	36	1.21604	3.57588	1.974
CROONQUIST_NRAS_SIGNALING_UP	25	1.24083	3.57504	1.97332
LEE_LIVER_CANCER_ACOX1_UP	32	1.2237	3.57344	1.9714
GO:0050850 positive regulation of calcium-mediated signaling	11	1.30318	3.56927	1.96528

## Sheet: CLL005
Table 5. Summary of significant overdispersed pathways and genesets with nonredundant aspects of transcriptional heterogeneity from single-cell analysis of 4 CLL samples
Name	n	Score	z	Adj.z	Sh.z	Adj.sh.z		non-redundant aspect names
GAVIN_FOXP3_TARGETS_CLUSTER_P3	64	1.86677	10.8008	9.85183	3.34514	1.56862		#PC1# GAVIN_FOXP3_TARGETS_CLUSTER_P3
TAKEDA_TARGETS_OF_NUP98_HOXA9_FUSION_3D_UP	58	1.82891	10.1217	9.17858	1.67742	-25.8896		#PC1# HOEBEKE_LYMPHOID_STEM_CELL_UP
SENESE_HDAC1_AND_HDAC2_TARGETS_DN	51	1.80724	9.54453	8.58617	1.64231	-25.8896		#PC1# MCLACHLAN_DENTAL_CARIES_UP
TAKEDA_TARGETS_OF_NUP98_HOXA9_FUSION_8D_DN	58	1.75065	9.32058	8.37113	1.14796	-25.8896		#PC1# GO:0005543 phospholipid binding
ACEVEDO_FGFR1_TARGETS_IN_PROSTATE_CANCER_MODEL_DN	54	1.73517	8.97167	8.00943	1.02081	-25.8896
SARRIO_EPITHELIAL_MESENCHYMAL_TRANSITION_DN	58	1.69928	8.78161	7.81959	0.479219	-25.8896
CHICAS_RB1_TARGETS_LOW_SERUM	57	1.64526	8.15999	7.13838	0.00874803	-25.8896
GINESTIER_BREAST_CANCER_20Q13_AMPLIFICATION_UP	75	1.58183	8.10937	7.09919	2.37986	-0.263008
PASINI_SUZ12_TARGETS_DN	116	1.49488	8.08578	7.08867	6.56057	5.47373
MCBRYAN_PUBERTAL_BREAST_5_6WK_DN	79	1.56614	8.04838	7.06081	1.72252	-25.8896
PASQUALUCCI_LYMPHOMA_BY_GC_STAGE_UP	115	1.47918	7.84322	6.84077	3.65943	2.01057
WHITFIELD_CELL_CYCLE_G2	77	1.53644	7.62271	6.60099	0.724999	-25.8896
WAMUNYOKOLI_OVARIAN_CANCER_LMP_DN	86	1.48692	7.25221	6.18468	0.830117	-25.8896
STARK_PREFRONTAL_CORTEX_22Q11_DELETION_UP	104	1.45324	7.23606	6.17758	2.90006	0.871658
SENESE_HDAC1_TARGETS_DN	79	1.49914	7.21621	6.16539	0.0827324	-25.8896
BILD_HRAS_ONCOGENIC_SIGNATURE	94	1.45977	7.09371	6.03294	1.19719	-25.8896
HOEBEKE_LYMPHOID_STEM_CELL_UP	62	1.53215	7.08122	6.02816	3.12208	1.24417
RIGGI_EWING_SARCOMA_PROGENITOR_UP	94	1.45086	6.97246	5.91035	0.759478	-25.8896
KINSEY_TARGETS_OF_EWSR1_FLII_FUSION_DN	113	1.40987	6.80318	5.72041	1.5258	-25.8896
VECCHI_GASTRIC_CANCER_EARLY_DN	59	1.51032	6.72017	5.6311	1.35059	-25.8896
GAUSSMANN_MLL_AF4_FUSION_TARGETS_C_UP	85	1.43749	6.57228	5.464	-0.2728	-25.8896
SANSOM_APC_MYC_TARGETS	98	1.40896	6.47952	5.36152	-0.192004	-25.8896
MCLACHLAN_DENTAL_CARIES_UP	102	1.40147	6.45718	5.34284	2.22246	-0.884751
MILI_PSEUDOPODIA_CHEMOTAXIS_DN	254	1.28075	6.40837	5.29211	3.76571	2.14676
GO:0019886 antigen processing and presentation of exogenous peptide antigen via MHC class II	53	1.49713	6.35023	5.22983	8.59299	7.55528
GO:0002504 antigen processing and presentation of peptide or polysaccharide antigen via MHC class II	56	1.48497	6.31685	5.20293	8.34413	7.31916
GO:0002495 antigen processing and presentation of peptide antigen via MHC class II	56	1.48489	6.31598	5.20293	6.89499	5.83702
GO:0003697 single-stranded DNA binding	51	1.49599	6.26199	5.14478	-0.0887698	-25.8896
ODONNELL_TFRC_TARGETS_UP	139	1.34374	6.22782	5.11022	1.43201	-25.8896
MCLACHLAN_DENTAL_CARIES_DN	93	1.39216	6.13165	5.00044	2.20641	-0.965711
THUM_SYSTOLIC_HEART_FAILURE_DN	139	1.32871	5.97905	4.82099	1.27639	-25.8896
GO:0030136 clathrin-coated vesicle	63	1.434	5.92574	4.76199	5.26026	4.01626
DARWICHE_PAPILLOMA_RISK_LOW_DN	72	1.41275	5.90795	4.74637	1.44989	-25.8896
CHANDRAN_METASTASIS_UP	126	1.33506	5.88215	4.72073	0.219393	-25.8896
GARY_CD5_TARGETS_UP	310	1.23558	5.87543	4.71836	4.89621	3.60603
ACEVEDO_FGFR1_TARGETS_IN_PROSTATE_CANCER_MODEL_UP	81	1.39238	5.86102	4.7064	1.41814	-25.8896
BASAKI_YBX1_TARGETS_DN	193	1.27921	5.77668	4.60815	2.35295	-0.329809
GO:0030176 integral component of endoplasmic reticulum membrane	71	1.40041	5.71833	4.5415	4.2278	2.76582
NAKAMURA_TUMOR_ZONE_PERIPHERAL_VS_CENTRAL_DN	301	1.23074	5.70051	4.52488	4.77545	3.45797
WIELAND_UP_BY_HBV_INFECTION	61	1.41331	5.60482	4.41113	3.36057	1.58555
DARWICHE_PAPILLOMA_RISK_HIGH_DN	80	1.37514	5.59857	4.40868	1.98138	-25.8896
GO:0031227 intrinsic component of endoplasmic reticulum membrane	73	1.38624	5.5805	4.39132	5.65603	4.48541
MATTIOLI_MGUS_VS_PCL	71	1.38494	5.51188	4.31049	0.409519	-25.8896
GO:0030666 endocytic vesicle membrane	57	1.39757	5.28519	4.02777	6.05797	4.91733
EBAUER_TARGETS_OF_PAX3_FOXO1_FUSION_UP	54	1.40345	5.26529	4.00748	-1.9028	-25.8896
SMID_BREAST_CANCER_RELAPSE_IN_BONE_DN	93	1.3309	5.2349	3.97358	1.43365	-25.8896
GO:0098552 side of membrane	103	1.24785	5.21312	3.95565	2.68692	0.482346
POOLA_INVASIVE_BREAST_CANCER_UP	95	1.32693	5.21331	3.95565	1.00258	-25.8896
GO:0005802 trans-Golgi network	89	1.32977	5.13895	3.86466	6.75105	5.68095
MCLACHLAN_DENTAL_CARIES_DN	93	1.25685	5.11697	3.84104	-1.05268	-25.8896
GO:0030662 coated vesicle membrane	70	1.3495	5.00366	3.69764	8.33749	7.31916
GOZGIT_ESR1_TARGETS_DN	216	1.22735	4.95783	3.64205	1.56071	-25.8896
GO:0060333 interferon-gamma-mediated signaling pathway	55	1.37479	4.93511	3.61685	5.86493	4.69955
SENESE_HDAC3_TARGETS_UP	252	1.2125	4.92643	3.61018	5.81863	4.66786
WANG_RESPONSE_TO_GSK3_INHIBITOR_SB216763_UP	199	1.23296	4.92069	3.60733	1.97733	-25.8896
GO:0005543 phospholipid binding	122	1.23047	4.88875	3.5696	1.77643	-25.8896
BAKKER_FOXO3_TARGETS_DN	81	1.32173	4.85561	3.53008	-0.584205	-25.8896
GOBERT_OLIGODENDROCYTE_DIFFERENTIATION_UP	211	1.2243	4.84944	3.52645	1.37239	-25.8896
GO:0005765 lysosomal membrane	135	1.22115	4.8369	3.51423	5.09906	3.8456
KAYO_AGING_MUSCLE_UP	89	1.30798	4.80935	3.48187	0.286235	-25.8896
GO:0050870 positive regulation of T cell activation	90	1.25252	4.65832	3.28189	4.21448	2.75814
OSMAN_BLADDER_CANCER_UP	296	1.15992	4.65324	3.27952	1.6299	-25.8896
GO:0002449 lymphocyte mediated immunity	86	1.25558	4.62428	3.24434	5.04119	3.78757
PILON_KLF1_TARGETS_UP	191	1.22113	4.6019	3.21805	0.627696	-25.8896
GO:0030139 endocytic vesicle	95	1.24516	4.58497	3.19917	3.81525	2.20593
DARWICHE_SKIN_TUMOR_PROMOTER_DN	78	1.26276	4.57339	3.18759	-0.644975	-25.8896
GO:0005774 vacuolar membrane	154	1.20354	4.54606	3.16188	5.83091	4.66938
GO:0022409 positive regulation of cell-cell adhesion	95	1.28448	4.55127	3.16188	5.39474	4.1778
GO:0002250 adaptive immune response	102	1.27683	4.54544	3.16188	1.12221	-25.8896
PENG_RAPAMYCIN_RESPONSE_UP	112	1.26641	4.5277	3.14153	0.783277	-25.8896
GO:0012506 vesicle membrane	185	1.189	4.52406	3.14065	5.52181	4.32295
SENGUPTA_NASOPHARYNGEAL_CARCINOMA_WITH_LMP1_UP	180	1.18927	4.47205	3.07247	0.113944	-25.8896
GO:0030135 coated vesicle	107	1.23013	4.46679	3.06924	6.1413	5.00561
GO:0071346 cellular response to interferon-gamma	61	1.32544	4.44644	3.04488	6.30414	5.18871
DARWICHE_SQUAMOUS_CELL_CARCINOMA_DN	77	1.29947	4.44152	3.04203	-0.607857	-25.8896
GO:0030133 transport vesicle	80	1.29395	4.41937	3.02287	14.804	14.1235
GO:0002460 adaptive immune response based on somatic recombination of immune receptors built from immunoglobulin superfamily domains	90	1.24293	4.4198	3.02287	6.96616	5.90297
FULCHER_INFLAMMATORY_RESPONSE_LECTIN_VS_LPS_DN	227	1.17123	4.42222	3.02287	2.4161	-0.179089
GO:0050852 T cell receptor signaling pathway	65	1.31569	4.40961	3.01306	4.61564	3.26245
SMID_BREAST_CANCER_BASAL_UP	143	1.2322	4.32216	2.89343	1.14909	-25.8896
GO:0034112 positive regulation of homotypic cell-cell adhesion	91	1.27378	4.30989	2.88372	7.7485	6.68601
GO:1903039 positive regulation of leukocyte cell-cell adhesion	91	1.27382	4.31044	2.88372	4.64172	3.28565
RODRIGUES_THYROID_CARCINOMA_POORLY_DIFFERENTIATED_DN	427	1.12864	4.28345	2.84982	3.01192	1.05226
LIAO_METASTASIS	219	1.19427	4.26165	2.82243	1.19544	-25.8896
WINNEPENNINCKX_MELANOMA_METASTASIS_UP	72	1.25193	4.22501	2.77348	3.59648	1.93103
GO:0022407 regulation of cell-cell adhesion	136	1.19905	4.21208	2.7586	4.01201	2.48232
GO:0031301 integral component of organelle membrane	124	1.20444	4.18032	2.71631	7.17492	6.10631
GO:0030659 cytoplasmic vesicle membrane	178	1.20589	4.16305	2.69492	4.51062	3.13418
GO:0034341 response to interferon-gamma	69	1.29169	4.15499	2.68692	6.20367	5.07441
GO:0050851 antigen receptor-mediated signaling pathway	90	1.26424	4.13826	2.66618	2.72551	0.559565
GO:0051251 positive regulation of lymphocyte activation	115	1.20715	4.12256	2.64689	3.69375	2.05377
SMID_BREAST_CANCER_LUMINAL_B_DN	140	1.19189	4.11162	2.63451	0.0931316	-25.8896
MCLACHLAN_DENTAL_CARIES_UP	102	1.25022	4.10011	2.62125	0.0359488	-25.8896
WALLACE_PROSTATE_CANCER_RACE_UP	126	1.23123	4.09724	2.62066	0.00143535	-25.8896
SANSOM_APC_TARGETS_DN	120	1.2021	4.08916	2.61238	-0.170925	-25.8896
GO:0031300 intrinsic component of organelle membrane	129	1.19606	4.0767	2.60115	5.40727	4.18869
GO:0035091 phosphatidylinositol binding	87	1.22667	4.07725	2.60115	4.12018	2.62814
GO:0038094 Fc-gamma receptor signaling pathway	57	1.26231	4.06494	2.58731	2.7742	0.624044
SATO_SILENCED_BY_METHYLATION_IN_PANCREATIC_CANCER_1	95	1.21749	4.04246	2.55933	-0.0683009	-25.8896
GAVIN_FOXP3_TARGETS_CLUSTER_P3	64	1.25034	4.0413	2.55933	-6.1119	-25.8896
GO:0044437 vacuolar part	170	1.17412	4.02612	2.54026	7.08763	6.02584
GO:0002429 immune response-activating cell surface receptor signaling pathway	136	1.1885	4.00573	2.51335	4.42	3.01589
CHICAS_RB1_TARGETS_SENESCENT	246	1.1479	3.95958	2.44757	2.09358	-2.29738
GO:0002696 positive regulation of leukocyte activation	122	1.19345	3.95314	2.44133	5.15721	3.91188
SHEDDEN_LUNG_CANCER_GOOD_SURVIVAL_A12	118	1.19473	3.93279	2.41402	0.656909	-25.8896
GO:0045785 positive regulation of cell adhesion	130	1.18634	3.90558	2.38268	6.51527	5.43414
GO:0002431 Fc receptor mediated stimulatory signaling pathway	59	1.24798	3.90742	2.38268	4.60248	3.25248
GO:0019884 antigen processing and presentation of exogenous antigen	119	1.19259	3.90537	2.38268	4.3024	2.85722
GO:0002433 immune response-regulating cell surface receptor signaling pathway involved in phagocytosis	56	1.25081	3.88442	2.35412	3.18551	1.3394
GO:0038096 Fc-gamma receptor signaling pathway involved in phagocytosis	56	1.24893	3.85877	2.31817	2.67726	0.460504
GO:0050867 positive regulation of cell activation	126	1.18453	3.83259	2.28117	7.85665	6.7912
GO:0098542 defense response to other organism	141	1.17524	3.80135	2.23601	0.555193	-25.8896
GO:0034110 regulation of homotypic cell-cell adhesion	121	1.18383	3.76973	2.19059	3.82971	2.22478
GO:0019882 antigen processing and presentation	142	1.17301	3.76799	2.19059	3.80387	2.19454
GO:0002478 antigen processing and presentation of exogenous peptide antigen	117	1.18529	3.75473	2.17311	3.63029	1.97967
GO:1903037 regulation of leukocyte cell-cell adhesion	120	1.18126	3.71387	2.11164	5.32202	4.09032
REACTOME_MHC_CLASS_II_ANTIGEN_PRESENTATION	50	1.24288	3.65114	2.01384	5.08602	3.83305

## Sheet: CLL032
Table 5. Summary of significant overdispersed pathways and genesets with nonredundant aspects of transcriptional heterogeneity from single-cell analysis of 4 CLL samples
Name	n	Score	z	Adj.z	Sh.z	Adj.sh.z		non-redundant aspect names
SARRIO_EPITHELIAL_MESENCHYMAL_TRANSITION_DN	63	1.65234	8.09171	6.787	1.63667	-32.0705		#PC1# SARRIO_EPITHELIAL_MESENCHYMAL_TRANSITION_DN
CHICAS_RB1_TARGETS_LOW_SERUM	53	1.67395	7.89528	6.65576	0.90543	-32.0705		#PC1# REACTOME_NONSENSE_MEDIATED_DECAY_ENHANCED_BY_THE_EXON_JUNCTION_COMPLEX
GINESTIER_BREAST_CANCER_20Q13_AMPLIFICATION_UP	78	1.57853	7.79821	6.6014	3.1808	1.41761
TAKEDA_TARGETS_OF_NUP98_HOXA9_FUSION_8D_DN	60	1.59329	7.34326	6.1427	0.422063	-32.0705
GAVIN_FOXP3_TARGETS_CLUSTER_P3	56	1.61018	7.36653	6.1427	-0.0142309	-32.0705
TAKEDA_TARGETS_OF_NUP98_HOXA9_FUSION_3D_UP	57	1.59593	7.25547	6.06762	-0.699868	-32.0705
AFFAR_YY1_TARGETS_UP	55	1.58754	7.0869	5.89211	-0.827794	-32.0705
KINSEY_TARGETS_OF_EWSR1_FLII_FUSION_DN	107	1.45406	6.99154	5.80046	2.06092	-1.29746
GAUSSMANN_MLL_AF4_FUSION_TARGETS_C_UP	81	1.50093	6.96062	5.78329	0.986386	-32.0705
BILD_HRAS_ONCOGENIC_SIGNATURE	95	1.4637	6.84802	5.66653	1.54486	-32.0705
SENESE_HDAC1_TARGETS_DN	74	1.49306	6.66572	5.46385	-0.0950701	-32.0705
WHITFIELD_CELL_CYCLE_G2	78	1.45674	6.33114	5.07152	0.0289475	-32.0705
ACEVEDO_FGFR1_TARGETS_IN_PROSTATE_CANCER_MODEL_DN	59	1.50224	6.29988	5.04824	-1.4031	-32.0705
PASINI_SUZ12_TARGETS_DN	117	1.37911	6.13055	4.8528	1.39359	-32.0705
MCBRYAN_PUBERTAL_BREAST_5_6WK_DN	86	1.4124	5.96011	4.65308	-0.112205	-32.0705
CHANDRAN_METASTASIS_UP	133	1.34768	5.92284	4.6194	1.74699	-32.0705
WAMUNYOKOLI_OVARIAN_CANCER_LMP_DN	82	1.40902	5.82064	4.50267	-1.22348	-32.0705
RIGGI_EWING_SARCOMA_PROGENITOR_UP	98	1.33799	5.17639	3.66788	-0.862067	-32.0705
REACTOME_NONSENSE_MEDIATED_DECAY_ENHANCED_BY_THE_EXON_JUNCTION_COMPLEX	107	1.32585	5.15815	3.65674	10.6156	9.89302
SANSOM_APC_MYC_TARGETS	105	1.32382	5.0925	3.57982	-0.170953	-32.0705
GO:0003823 antigen binding	51	1.41621	5.03998	3.52007	5.3938	4.23601
REACTOME_PEPTIDE_CHAIN_ELONGATION	90	1.32757	4.87102	3.30334	12.4033	11.7226
GO:0022626 cytosolic ribosome	87	1.27475	4.86767	3.30334	7.78581	6.90579
ODONNELL_TFRC_TARGETS_UP	140	1.27476	4.82836	3.25947	0.796775	-32.0705
BASAKI_YBX1_TARGETS_DN	186	1.2433	4.77767	3.19871	1.2174	-32.0705
GO:0000184 nuclear-transcribed mRNA catabolic process, nonsense-mediated decay	105	1.29479	4.64617	3.01961	8.60039	7.77811
LIAO_METASTASIS	209	1.22452	4.61943	2.99181	6.86662	5.91692
GO:0006614 SRP-dependent cotranslational protein targeting to membrane	101	1.25291	4.59631	2.9689	11.1217	10.4146
REACTOME_SRP_DEPENDENT_COTRANSLATIONAL_PROTEIN_TARGETING_TO_MEMBRANE	113	1.24205	4.58478	2.9627	9.17751	8.37839
REACTOME_TRANSLATION	148	1.2143	4.47312	2.80701	11.7621	11.059
KEGG_RIBOSOME	81	1.2682	4.45861	2.79572	7.73339	6.85209
GO:0045047 protein targeting to ER	104	1.24399	4.44791	2.78986	14.809	14.1784
GOBERT_OLIGODENDROCYTE_DIFFERENTIATION_DN	436	1.13692	4.41798	2.76444	3.10046	1.30226
THUM_SYSTOLIC_HEART_FAILURE_DN	136	1.21934	4.42387	2.76444	-0.397426	-32.0705
GO:0006414 translational elongation	152	1.24265	4.40383	2.75255	11.315	10.5971
GO:0006613 cotranslational protein targeting to membrane	103	1.23944	4.33892	2.67242	9.78111	9.02724
LEE_BMP2_TARGETS_DN	495	1.12763	4.33931	2.67242	7.35153	6.43558
REACTOME_3_UTR_MEDIATED_TRANSLATIONAL_REGULATION	111	1.26933	4.33295	2.67225	16.8837	16.2905
GO:0070972 protein localization to endoplasmic reticulum	120	1.22169	4.25449	2.56041	8.85636	8.05353
GO:0044391 ribosomal subunit	115	1.25987	4.23474	2.55556	9.91258	9.15384
GO:0051082 unfolded protein binding	59	1.33221	4.23855	2.55556	3.91864	2.42969
NAKAMURA_TUMOR_ZONE_PERIPHERAL_VS_CENTRAL_DN	300	1.15363	4.2362	2.55556	2.76852	0.783844
GO:0072599 establishment of protein localization to endoplasmic reticulum	107	1.22964	4.22116	2.54272	12.7431	12.0629
STARK_PREFRONTAL_CORTEX_22Q11_DELETION_UP	95	1.27778	4.21299	2.53809	-1.38623	-32.0705
SENESE_HDAC3_TARGETS_UP	243	1.16453	4.167	2.47438	1.13724	-32.0705
REACTOME_INFLUENZA_VIRAL_RNA_TRANSCRIPTION_AND_REPLICATION	105	1.26319	4.14137	2.44203	6.56089	5.5706
SANA_RESPONSE_TO_IFNG_DN	51	1.29214	4.1108	2.40157	3.45156	1.8002
GO:0006402 mRNA catabolic process	170	1.18593	4.09111	2.37804	9.89415	9.14193
GO:0003735 structural constituent of ribosome	121	1.21149	4.08184	2.37091	8.88538	8.07911
GO:0000956 nuclear-transcribed mRNA catabolic process	162	1.18831	4.06825	2.35675	7.1189	6.18458
GO:0060333 interferon-gamma-mediated signaling pathway	56	1.27632	4.02641	2.29715	2.94296	1.05477
CHICAS_RB1_TARGETS_SENESCENT	245	1.15564	3.9734	2.21857	1.034	-32.0705
GO:0005840 ribosome	163	1.18266	3.96697	2.21548	7.25056	6.33025
GO:0034341 response to interferon-gamma	70	1.24737	3.91673	2.1401	5.33803	4.17365
GO:0006415 translational termination	140	1.18722	3.84845	2.03295	7.8204	6.93928
REACTOME_INFLUENZA_LIFE_CYCLE	137	1.18656	3.80869	1.97254	7.49574	6.59417

## Sheet: CLL096
Table 5. Summary of significant overdispersed pathways and genesets with nonredundant aspects of transcriptional heterogeneity from single-cell analysis of 4 CLL samples
Name	n	Score	z	Adj.z	Sh.z	Adj.sh.z		non-redundant aspect names
REACTOME_PEPTIDE_CHAIN_ELONGATION	90	1.85427	11.265	10.3592	25.6524	25.3198		#PC1# REACTOME_PEPTIDE_CHAIN_ELONGATION
REACTOME_3_UTR_MEDIATED_TRANSLATIONAL_REGULATION	110	1.76817	10.9813	10.1185	21.633	21.2894		#PC1# WAMUNYOKOLI_OVARIAN_CANCER_LMP_DN
GO:0022626 cytosolic ribosome	88	1.82005	10.8212	9.98507	19.5093	19.1459		#PC1# GO:0051082 unfolded protein binding
REACTOME_INFLUENZA_VIRAL_RNA_TRANSCRIPTION_AND_REPLICATION	105	1.75914	10.7206	9.90611	23.8976	23.564
KEGG_RIBOSOME	82	1.83027	10.7011	9.90611	15.4254	15.0016
REACTOME_NONSENSE_MEDIATED_DECAY_ENHANCED_BY_THE_EXON_JUNCTION_COMPLEX	106	1.75034	10.6496	9.8689	35.5369	35.2582
REACTOME_SRP_DEPENDENT_COTRANSLATIONAL_PROTEIN_TARGETING_TO_MEMBRANE	113	1.71261	10.4117	9.62794	17.8524	17.464
GO:0006614 SRP-dependent cotranslational protein targeting to membrane	103	1.70542	10.0318	9.23075	23.9526	23.6132
GO:0000184 nuclear-transcribed mRNA catabolic process, nonsense-mediated decay	105	1.69072	9.91749	9.11938	26.5232	26.1907
GO:0045047 protein targeting to ER	106	1.68652	9.89661	9.1178	21.048	20.7021
GO:0006613 cotranslational protein targeting to membrane	105	1.68891	9.89598	9.1178	19.7373	19.375
GO:0072599 establishment of protein localization to endoplasmic reticulum	109	1.66326	9.70175	8.91665	18.7371	18.3616
REACTOME_INFLUENZA_LIFE_CYCLE	136	1.60316	9.61565	8.83202	17.4987	17.1078
REACTOME_TRANSLATION	148	1.57918	9.55233	8.77152	16.7269	16.3255
GO:0044391 ribosomal subunit	117	1.62987	9.5029	8.72558	22.447	22.1078
GO:0003735 structural constituent of ribosome	120	1.62188	9.47789	8.70571	16.3302	15.9237
GO:0070972 protein localization to endoplasmic reticulum	121	1.60636	9.30443	8.52395	23.655	23.3237
GO:0006415 translational termination	140	1.56285	9.16069	8.37389	20.449	20.0963
REACTOME_METABOLISM_OF_MRNA	195	1.45824	8.59244	7.75665	16.5772	16.1746
GO:0006612 protein targeting to membrane	140	1.51896	8.55451	7.72127	22.0383	21.697
GO:0005840 ribosome	161	1.48658	8.48083	7.64608	12.8762	12.3787
GO:0043624 cellular protein complex disassembly	175	1.4629	8.35751	7.51558	22.4714	22.1277
GO:0006414 translational elongation	154	1.48404	8.31961	7.47938	11.9678	11.4362
GO:0019080 viral gene expression	165	1.45739	8.11112	7.25333	11.1645	10.6006
HSIAO_HOUSEKEEPING_GENES	338	1.33787	8.01525	7.15194	11.8882	11.3553
GO:0043241 protein complex disassembly	190	1.42514	7.98965	7.12876	14.4343	13.9831
GO:0044445 cytosolic part	147	1.46547	7.9222	7.05861	17.5983	17.2071
GO:0000956 nuclear-transcribed mRNA catabolic process	162	1.44668	7.899	7.03773	24.969	24.6363
GO:0006402 mRNA catabolic process	170	1.43443	7.83841	6.97485	14.3981	13.948
REACTOME_METABOLISM_OF_RNA	231	1.38319	7.81379	6.95207	18.3955	18.0159
GO:0044033 multi-organism metabolic process	170	1.43252	7.80873	6.95103	13.3652	12.8819
GO:0032984 macromolecular complex disassembly	197	1.40642	7.78154	6.92508	15.9233	15.5109
GO:0019083 viral transcription	160	1.43129	7.63145	6.76117	15.9658	15.5522
REACTOME_METABOLISM_OF_PROTEINS	279	1.342	7.56659	6.69256	12.1902	11.6663
GO:0006413 translational initiation	210	1.36787	7.29578	6.39073	26.7459	26.4009
GO:0006401 RNA catabolic process	188	1.37594	7.15484	6.23464	16.8	16.3979
GO:0019058 viral life cycle	269	1.29703	6.59634	5.59837	16.8053	16.4007
GO:0098552 side of membrane	104	1.4309	6.59595	5.59837	10.4655	9.86497
GO:0015934 large ribosomal subunit	64	1.49419	6.35744	5.32248	21.4029	21.0593
GO:0019886 antigen processing and presentation of exogenous peptide antigen via MHC class II	55	1.50948	6.22422	5.16892	8.39513	7.65812
GO:0002495 antigen processing and presentation of peptide antigen via MHC class II	58	1.48609	6.06642	4.98903	7.9158	7.1394
GO:0002504 antigen processing and presentation of peptide or polysaccharide antigen via MHC class II	58	1.48607	6.0662	4.98903	7.16957	6.33328
GO:0031227 intrinsic component of endoplasmic reticulum membrane	69	1.45385	6.03048	4.95061	6.52266	5.61147
GO:0090150 establishment of protein localization to membrane	219	1.28809	5.9511	4.85931	9.77299	9.13805
GO:0030176 integral component of endoplasmic reticulum membrane	68	1.44881	5.94035	4.85076	6.73084	5.84031
GO:0005802 trans-Golgi network	78	1.40416	5.64561	4.49481	8.92536	8.23211
GO:0002478 antigen processing and presentation of exogenous peptide antigen	118	1.33734	5.50718	4.32726	3.88809	2.54515
GO:0019884 antigen processing and presentation of exogenous antigen	120	1.33397	5.48834	4.30834	7.55644	6.75388
GO:0051251 positive regulation of lymphocyte activation	121	1.32878	5.42421	4.23243	7.22864	6.39465
GO:0072657 protein localization to membrane	253	1.24366	5.37492	4.17485	10.462	9.86366
GO:1903039 positive regulation of leukocyte cell-cell adhesion	92	1.35908	5.34879	4.15051	6.07156	5.10367
GO:0034112 positive regulation of homotypic cell-cell adhesion	92	1.35907	5.34858	4.15051	4.86212	3.71677
GO:0048002 antigen processing and presentation of peptide antigen	130	1.31404	5.33021	4.13164	4.6843	3.51433
GO:0002696 positive regulation of leukocyte activation	127	1.31311	5.27031	4.05996	6.81315	5.93176
WAMUNYOKOLI_OVARIAN_CANCER_LMP_DN	83	1.2836	5.2438	4.0305	-0.00883917	-23.067
LI_AMPLIFIED_IN_LUNG_CANCER	98	1.26665	5.2335	4.02162	7.34431	6.52197
GO:0050870 positive regulation of T cell activation	91	1.34775	5.16802	3.9421	5.98766	5.00717
GO:0030133 transport vesicle	82	1.35887	5.13391	3.90247	5.45442	4.40884
GO:0050867 positive regulation of cell activation	132	1.29901	5.11507	3.88392	7.9222	7.14375
GO:0022409 positive regulation of cell-cell adhesion	96	1.33701	5.11135	3.88392	4.60944	3.4233
POOLA_INVASIVE_BREAST_CANCER_UP	96	1.33692	5.10998	3.88392	2.04443	-0.537518
CHEN_METABOLIC_SYNDROM_NETWORK	429	1.18213	5.0143	3.76423	10.3439	9.74081
GO:0030662 coated vesicle membrane	71	1.36519	4.96338	3.7019	4.32989	3.10388
GO:0045785 positive regulation of cell adhesion	132	1.28651	4.90814	3.63353	5.49626	4.45264
SEIDEN_ONCOGENESIS_BY_MET	65	1.30697	4.90492	3.6333	0.0579294	-23.067
SCHUETZ_BREAST_CANCER_DUCTAL_INVASIVE_UP	90	1.3304	4.89948	3.63009	5.88713	4.89554
REACTOME_MHC_CLASS_II_ANTIGEN_PRESENTATION	55	1.32561	4.89629	3.62978	6.48848	5.57457
GO:0030136 clathrin-coated vesicle	62	1.37391	4.84341	3.564	6.28668	5.35311
GO:0042277 peptide binding	71	1.29459	4.7715	3.47246	3.72454	2.34847
GO:0002694 regulation of leukocyte activation	180	1.20695	4.75705	3.45705	7.62145	6.82102
BILANGES_SERUM_AND_RAPAMYCIN_SENSITIVE_GENES	59	1.37043	4.71647	3.4142	12.96	12.4635
GO:0019882 antigen processing and presentation	143	1.2668	4.71735	3.4142	5.91916	4.92984
FORTSCHEGGER_PHF8_TARGETS_UP	102	1.30358	4.71998	3.4142	2.59852	0.741245
BOQUEST_STEM_CELL_DN	60	1.31115	4.71288	3.41309	5.30781	4.23862
MARTENS_TRETINOIN_RESPONSE_DN	415	1.17147	4.66263	3.35179	9.47317	8.81962
HADDAD_B_LYMPHOCYTE_PROGENITOR	176	1.24312	4.66172	3.35179	2.49051	0.540646
GO:1903037 regulation of leukocyte cell-cell adhesion	123	1.23573	4.60694	3.28145	4.43502	3.22856
ICHIBA_GRAFT_VERSUS_HOST_DISEASE_35D_UP	56	1.36246	4.53143	3.1822	6.38154	5.45838
GOBERT_OLIGODENDROCYTE_DIFFERENTIATION_DN	443	1.13816	4.49004	3.12898	5.36036	4.30086
GO:0051082 unfolded protein binding	62	1.29728	4.47786	3.11588	2.56015	0.676016
GO:0031300 intrinsic component of organelle membrane	123	1.22931	4.44184	3.06968	5.57313	4.54108
MCLACHLAN_DENTAL_CARIES_UP	101	1.2461	4.42267	3.04672	4.30371	3.0706
JOHNSTONE_PARVB_TARGETS_2_UP	66	1.28733	4.41685	3.04226	3.86554	2.51653
GO:0033218 amide binding	73	1.27596	4.39719	3.01847	4.37082	3.15679
GO:0022407 regulation of cell-cell adhesion	137	1.21775	4.38974	3.01167	5.75191	4.74369
GO:0030135 coated vesicle	107	1.23868	4.37868	2.99978	4.26354	3.02407
GO:0002250 adaptive immune response	102	1.24229	4.36479	2.98388	5.29375	4.22362
GO:0050863 regulation of T cell activation	122	1.22503	4.33589	2.94686	6.69688	5.80402
PENG_GLUTAMINE_DEPRIVATION_DN	236	1.17198	4.29107	2.89451	5.26256	4.18746
PENG_RAPAMYCIN_RESPONSE_DN	172	1.19495	4.28901	2.89451	4.68769	3.51442
SMID_BREAST_CANCER_RELAPSE_IN_BONE_DN	92	1.28712	4.29402	2.89451	2.87108	1.19328
MCLACHLAN_DENTAL_CARIES_DN	91	1.28796	4.28894	2.89451	2.59044	0.731949
GO:0030666 endocytic vesicle membrane	58	1.33678	4.25953	2.85626	3.54435	2.11051
PASINI_SUZ12_TARGETS_DN	117	1.22424	4.25168	2.84851	3.74649	2.37341
WIELAND_UP_BY_HBV_INFECTION	62	1.32748	4.24096	2.83664	2.77974	1.04206
GO:0051249 regulation of lymphocyte activation	163	1.22693	4.21817	2.80751	7.57792	6.7752
GOZGIT_ESR1_TARGETS_DN	210	1.20173	4.14194	2.70121	5.48687	4.44599
BASSO_CD40_SIGNALING_UP	68	1.30846	4.1255	2.68415	3.43444	1.97252
GO:0002431 Fc receptor mediated stimulatory signaling pathway	56	1.28461	4.12584	2.68415	3.00606	1.38297
GO:0009897 external side of plasma membrane	55	1.33138	4.10845	2.66271	5.01643	3.89192
GO:0002460 adaptive immune response based on somatic recombination of immune receptors built from immunoglobulin superfamily domains	89	1.23879	4.09552	2.64721	3.58838	2.17404
GO:0042623 ATPase activity, coupled	145	1.19837	4.09263	2.64633	4.6059	3.4208
GO:0034110 regulation of homotypic cell-cell adhesion	125	1.24403	4.08941	2.64494	5.75155	4.74369
GO:0070035 purine NTP-dependent helicase activity	50	1.29248	4.07851	2.63229	0.112203	-23.067
GO:0038096 Fc-gamma receptor signaling pathway involved in phagocytosis	53	1.28624	4.07426	2.63053	4.85108	3.70491
GO:0002433 immune response-regulating cell surface receptor signaling pathway involved in phagocytosis	53	1.28613	4.07287	2.63053	2.19292	-0.0902831
GO:0002449 lymphocyte mediated immunity	88	1.23646	4.04371	2.59105	3.66084	2.26855
ICHIBA_GRAFT_VERSUS_HOST_DISEASE_D7_UP	54	1.28177	4.04059	2.59068	6.66753	5.77555
GO:0008026 ATP-dependent helicase activity	50	1.28937	4.03912	2.59068	0.534537	-23.067
GO:0060333 interferon-gamma-mediated signaling pathway	53	1.28306	4.03319	2.58513	2.09702	-0.343601
WINTER_HYPOXIA_METAGENE	102	1.22281	4.02727	2.57996	4.45125	3.24811
GO:0071346 cellular response to interferon-gamma	58	1.2736	4.02543	2.57996	2.09096	-0.365884
GO:0031301 integral component of organelle membrane	117	1.21017	4.00311	2.55021	4.73337	3.56699
GO:0002440 production of molecular mediator of immune response	55	1.27518	3.97867	2.51718	2.17647	-0.126304
GO:0038094 Fc-gamma receptor signaling pathway	54	1.27602	3.96657	2.50232	3.7884	2.4236
GO:0070665 positive regulation of leukocyte proliferation	50	1.27655	3.87965	2.37501	1.61491	-23.067
GO:0005765 lysosomal membrane	132	1.19237	3.85548	2.34141	3.80973	2.44903
SWEET_LUNG_CANCER_KRAS_UP	241	1.15111	3.84078	2.32214	3.5256	2.08718
REACTOME_ACTIVATION_OF_THE_MRNA_UPON_BINDING_OF_THE_CAP_BINDING_COMPLEX_AND_EIFS_AND_SUBSEQUENT_BINDING_TO_43S	57	1.25723	3.7912	2.24893	7.54269	6.74111
HOSHIDA_LIVER_CANCER_SUBCLASS_S1	124	1.19049	3.74339	2.17752	2.79292	1.06262
PENG_LEUCINE_DEPRIVATION_DN	133	1.18494	3.73456	2.1669	4.73709	3.56758
KOINUMA_TARGETS_OF_SMAD2_OR_SMAD3	382	1.12094	3.73055	2.16385	7.17023	6.33328
GO:0009306 protein secretion	132	1.18385	3.70606	2.13051	4.02146	2.70944
GO:0051443 positive regulation of ubiquitin-protein transferase activity	63	1.24179	3.70534	2.13051	1.69618	-23.067
FULCHER_INFLAMMATORY_RESPONSE_LECTIN_VS_LPS_DN	221	1.14917	3.68405	2.10313	10.2777	9.67293
GO:0050684 regulation of mRNA processing	66	1.2363	3.68514	2.10313	0.465079	-23.067
GO:0034341 response to interferon-gamma	66	1.23526	3.67108	2.08567	3.79504	2.43141
LIAO_METASTASIS	224	1.14615	3.63633	2.03307	3.94072	2.60685

## Sheet: CLL146
Table 5. Summary of significant overdispersed pathways and genesets with nonredundant aspects of transcriptional heterogeneity from single-cell analysis of 4 CLL samples
Name	n	Score	z	Adj.z	Sh.z	Adj.sh.z		non-redundant aspect names
REACTOME_PEPTIDE_CHAIN_ELONGATION	90	3.05975	23.3946	22.9653	109.583	109.492		#PC1# REACTOME_PEPTIDE_CHAIN_ELONGATION
GO:0022626 cytosolic ribosome	87	2.95053	22.2169	21.7963	62.0324	61.8893		#PC1# FLECHNER_BIOPSY_KIDNEY_TRANSPLANT_REJECTED_VS_OK_UP
KEGG_RIBOSOME	82	2.97216	22.0396	21.6342	57.6362	57.4911		#PC1# GO:0006959 humoral immune response
REACTOME_INFLUENZA_VIRAL_RNA_TRANSCRIPTION_AND_REPLICATION	106	2.77834	21.873	21.4779	40.1071	39.9303		#PC1# CAIRO_HEPATOBLASTOMA_CLASSES_UP
REACTOME_NONSENSE_MEDIATED_DECAY_ENHANCED_BY_THE_EXON_JUNCTION_COMPLEX	108	2.7297	21.5228	21.1318	44.4908	44.3258
REACTOME_3_UTR_MEDIATED_TRANSLATIONAL_REGULATION	110	2.71486	21.4926	21.1096	60.2207	60.0781
GO:0045047 protein targeting to ER	107	2.69374	21.1185	20.7361	38.0356	37.8532
GO:0006613 cotranslational protein targeting to membrane	106	2.68759	21.0024	20.6299	42.6912	42.5224
REACTOME_SRP_DEPENDENT_COTRANSLATIONAL_PROTEIN_TARGETING_TO_MEMBRANE	115	2.63791	21.0079	20.6299	44.9336	44.7686
GO:0006614 SRP-dependent cotranslational protein targeting to membrane	104	2.69614	20.9702	20.6022	49.7754	49.6191
GO:0072599 establishment of protein localization to endoplasmic reticulum	110	2.65848	20.9423	20.5785	42.3925	42.2239
GO:0000184 nuclear-transcribed mRNA catabolic process, nonsense-mediated decay	108	2.64923	20.7417	20.3786	53.9311	53.7793
REACTOME_INFLUENZA_LIFE_CYCLE	136	2.5038	20.6445	20.2836	65.9002	65.7593
GO:0044391 ribosomal subunit	127	2.5109	20.3086	19.9453	37.3336	37.1503
GO:0070972 protein localization to endoplasmic reticulum	124	2.52164	20.2787	19.9184	26.3866	26.1459
REACTOME_TRANSLATION	151	2.38231	19.943	19.5798	47.5524	47.393
GO:0003735 structural constituent of ribosome	132	2.39895	19.3448	18.9734	38.0091	37.8278
GO:0006612 protein targeting to membrane	144	2.32667	19.0441	18.6698	51.0171	50.8623
GO:0006414 translational elongation	174	2.225	18.9386	18.5651	38.7447	38.5644
GO:0019083 viral transcription	168	2.24092	18.9291	18.5581	28.592	28.364
GO:0044445 cytosolic part	149	2.29582	18.8883	18.5192	46.1494	45.987
GO:0019080 viral gene expression	174	2.1978	18.6094	18.2372	25.6968	25.4506
GO:0006415 translational termination	156	2.23907	18.4909	18.1188	42.8893	42.7197
GO:0044033 multi-organism metabolic process	181	2.16844	18.4714	18.1012	26.7783	26.5401
GO:0005840 ribosome	177	2.1641	18.2933	17.9217	49.0321	48.8756
GO:0000956 nuclear-transcribed mRNA catabolic process	162	2.16912	17.8704	17.4921	28.552	28.3247
GO:0006402 mRNA catabolic process	173	2.09373	17.3007	16.912	51.4306	51.2744
REACTOME_METABOLISM_OF_MRNA	192	2.03977	17.1641	16.7743	34.338	34.1454
GO:0043624 cellular protein complex disassembly	198	2.00284	16.8417	16.4465	27.9328	27.7026
GO:0043241 protein complex disassembly	212	1.94589	16.4276	16.0243	36.4485	36.263
GO:0006401 RNA catabolic process	194	1.97058	16.311	15.9069	34.414	34.2208
REACTOME_METABOLISM_OF_RNA	232	1.8877	16.0708	15.6626	38.7506	38.569
GO:0032984 macromolecular complex disassembly	220	1.90502	16.0492	15.6423	33.7872	33.5925
GO:0006413 translational initiation	222	1.89249	15.9185	15.5102	23.1557	22.8855
GO:0090150 establishment of protein localization to membrane	229	1.86734	15.7148	15.303	34.4432	34.2491
REACTOME_METABOLISM_OF_PROTEINS	296	1.77665	15.6205	15.208	27.5005	27.2676
GO:0019058 viral life cycle	288	1.77355	15.4353	15.0196	37.0656	36.8821
HSIAO_HOUSEKEEPING_GENES	349	1.6711	14.6732	14.2373	24.6389	24.3832
GO:0072657 protein localization to membrane	272	1.72075	14.329	13.8843	19.7444	19.4295
BILANGES_SERUM_AND_RAPAMYCIN_SENSITIVE_GENES	60	2.25313	14.158	13.7096	23.5575	23.291
GO:0015934 large ribosomal subunit	71	2.12658	13.6347	13.1706	35.1326	34.9412
GO:0003823 antigen binding	50	2.01546	11.3613	10.8036	4.40118	3.16667
MCLACHLAN_DENTAL_CARIES_UP	106	1.72625	10.7497	10.1613	10.5103	9.93252
MCLACHLAN_DENTAL_CARIES_DN	99	1.7046	10.2707	9.65609	10.5375	9.95946
PECE_MAMMARY_STEM_CELL_DN	101	1.69114	10.17	9.55135	28.4949	28.2682
WIELAND_UP_BY_HBV_INFECTION	65	1.79782	10.0444	9.42001	5.38285	4.32377
GO:0019886 antigen processing and presentation of exogenous peptide antigen via MHC class II	57	1.79815	9.67238	9.02519	7.00257	6.14003
REACTOME_ACTIVATION_OF_THE_MRNA_UPON_BINDING_OF_THE_CAP_BINDING_COMPLEX_AND_EIFS_AND_SUBSEQUENT_BINDING_TO_43S	55	1.79598	9.55155	8.89812	29.5686	29.3471
GO:0002495 antigen processing and presentation of peptide antigen via MHC class II	60	1.75464	9.36916	8.70665	6.30987	5.3719
GO:0002504 antigen processing and presentation of peptide or polysaccharide antigen via MHC class II	60	1.7546	9.36884	8.70665	6.30884	5.3719
BOQUEST_STEM_CELL_DN	72	1.69764	9.25771	8.58944	5.71801	4.70812
GO:0030666 endocytic vesicle membrane	57	1.75526	9.23658	8.56893	3.9528	2.62279
MARTENS_TRETINOIN_RESPONSE_DN	463	1.32556	8.95316	8.26551	12.3001	11.7992
GO:0050866 negative regulation of cell activation	51	1.75078	8.89885	8.20902	5.47201	4.424
GO:0015935 small ribosomal subunit	56	1.72476	8.87625	8.18677	20.9648	20.6673
GO:0019724 B cell mediated immunity	51	1.73929	8.78385	8.08891	4.55883	3.35236
ICHIBA_GRAFT_VERSUS_HOST_DISEASE_D7_UP	61	1.68355	8.6632	7.96023	4.72397	3.55383
GO:0002274 myeloid leukocyte activation	55	1.70414	8.61689	7.91262	3.80829	2.44995
GO:0030662 coated vesicle membrane	73	1.63741	8.61543	7.91262	7.14584	6.29724
POOLA_INVASIVE_BREAST_CANCER_UP	101	1.56631	8.60966	7.90844	6.13196	5.17474
GO:0098552 side of membrane	112	1.54206	8.56928	7.86664	6.16745	5.21369
GO:0002440 production of molecular mediator of immune response	61	1.67341	8.55421	7.8523	5.99833	5.02836
TIEN_INTESTINE_PROBIOTICS_24HR_DN	155	1.47088	8.43776	7.72763	16.0401	15.6542
GO:0070372 regulation of ERK1 and ERK2 cascade	52	1.6992	8.42609	7.71692	1.27663	-37.0519
GO:0060326 cell chemotaxis	50	1.70011	8.33926	7.62426	1.65674	-37.0519
GO:0030176 integral component of endoplasmic reticulum membrane	74	1.60951	8.32823	7.6142	4.47082	3.24785
GO:0070371 ERK1 and ERK2 cascade	56	1.6646	8.24737	7.52788	2.35244	0.195466
GO:0031227 intrinsic component of endoplasmic reticulum membrane	75	1.59844	8.23263	7.5137	6.66821	5.76828
ICHIBA_GRAFT_VERSUS_HOST_DISEASE_35D_UP	61	1.64242	8.21799	7.49962	4.1322	2.83247
SMID_BREAST_CANCER_NORMAL_LIKE_UP	197	1.41212	8.15154	7.42885	4.97709	3.86303
OSMAN_BLADDER_CANCER_DN	331	1.3325	8.10195	7.37645	17.3452	16.9875
REACTOME_MHC_CLASS_II_ANTIGEN_PRESENTATION	59	1.63789	8.0875	7.3625	2.89909	1.15891
GO:0032844 regulation of homeostatic process	118	1.49564	8.07221	7.34759	2.93317	1.21477
GO:0030136 clathrin-coated vesicle	66	1.60514	7.99499	7.26477	3.85737	2.50722
GO:0050870 positive regulation of T cell activation	96	1.52821	7.98546	7.25612	2.36734	0.226602
GO:0005802 trans-Golgi network	91	1.53801	7.97757	7.24926	5.31949	4.24809
GO:0022409 positive regulation of cell-cell adhesion	101	1.51763	7.97431	7.24745	3.13907	1.51204
GO:1903039 positive regulation of leukocyte cell-cell adhesion	97	1.52377	7.95361	7.22793	2.74623	0.918524
GO:0034112 positive regulation of homotypic cell-cell adhesion	97	1.52375	7.95334	7.22793	6.19798	5.24712
GO:0032845 negative regulation of homeostatic process	59	1.62468	7.94362	7.22067	0.807654	-37.0519
GO:0002699 positive regulation of immune effector process	60	1.62114	7.94481	7.22067	3.16425	1.5502
GO:0033218 amide binding	76	1.5698	7.92599	7.203	6.59941	5.69642
GO:0030133 transport vesicle	86	1.54264	7.89612	7.17188	5.01846	3.90711
GO:0050864 regulation of B cell activation	54	1.63829	7.88131	7.15727	3.11263	1.47513
GO:0042277 peptide binding	73	1.57288	7.86491	7.14088	5.68529	4.67325
GO:0030330 DNA damage response, signal transduction by p53 class mediator	77	1.55773	7.81252	7.08495	2.72829	0.901754
GO:0045619 regulation of lymphocyte differentiation	57	1.61949	7.80569	7.07905	2.89419	1.15131
KEEN_RESPONSE_TO_ROSIGLITAZONE_DN	52	1.63175	7.72444	6.99125	3.1212	1.48788
GO:0002791 regulation of peptide secretion	68	1.57405	7.70952	6.97641	3.28142	1.72183
GO:0030139 endocytic vesicle	106	1.48867	7.70581	6.9739	5.23299	4.14989
MORI_MATURE_B_LYMPHOCYTE_UP	72	1.55534	7.62414	6.88699	4.11827	2.8207
SCHUETZ_BREAST_CANCER_DUCTAL_INVASIVE_UP	100	1.49324	7.62506	6.88699	4.04363	2.72752
MATTIOLI_MGUS_VS_PCL	77	1.53383	7.52203	6.77576	4.13043	2.83192
CAIRO_HEPATOBLASTOMA_CLASSES_UP	410	1.27586	7.44071	6.68728	10.7323	10.1633
PENG_GLUTAMINE_DEPRIVATION_DN	247	1.33862	7.4321	6.67929	11.6256	11.1001
GO:0043235 receptor complex	64	1.55433	7.34151	6.58031	2.11521	-0.471094
GO:0002478 antigen processing and presentation of exogenous peptide antigen	123	1.435	7.30788	6.54447	3.91857	2.58108
GO:0022407 regulation of cell-cell adhesion	142	1.41063	7.28589	6.52155	3.46691	1.99324
BASSO_CD40_SIGNALING_UP	68	1.53515	7.25313	6.48661	2.0063	-0.944206
GO:0034110 regulation of homotypic cell-cell adhesion	129	1.42306	7.24468	6.47872	2.8727	1.11515
GO:1903037 regulation of leukocyte cell-cell adhesion	126	1.42436	7.20802	6.43939	5.06331	3.95935
GO:0019884 antigen processing and presentation of exogenous antigen	125	1.42553	7.20648	6.43917	4.3278	3.0795
GO:0050863 regulation of T cell activation	125	1.42479	7.1956	6.42853	2.61159	0.693311
GO:0002790 peptide secretion	80	1.4994	7.1822	6.41507	3.47251	1.99681
GO:0009897 external side of plasma membrane	62	1.54644	7.17959	6.41362	0.665075	-37.0519
GO:0051251 positive regulation of lymphocyte activation	126	1.41901	7.12826	6.35782	3.58554	2.14915
GO:0050671 positive regulation of lymphocyte proliferation	52	1.57577	7.12457	6.35605	1.37172	-37.0519
GO:0032946 positive regulation of mononuclear cell proliferation	52	1.57572	7.1241	6.35605	1.20588	-37.0519
GO:0048002 antigen processing and presentation of peptide antigen	135	1.40745	7.11588	6.3483	4.40377	3.16818
GO:0045785 positive regulation of cell adhesion	141	1.40037	7.10922	6.34228	7.09948	6.24732
GO:0032944 regulation of mononuclear cell proliferation	79	1.49567	7.1068	6.34158	2.43507	0.359995
GO:0050670 regulation of lymphocyte proliferation	79	1.49562	7.10611	6.34158	4.49161	3.27349
GO:0032103 positive regulation of response to external stimulus	61	1.53752	7.0412	6.27048	0.663345	-37.0519
GO:0042770 signal transduction in response to DNA damage	88	1.46948	7.01138	6.23852	2.72593	0.900545
GO:0070665 positive regulation of leukocyte proliferation	53	1.56105	7.00436	6.23204	1.18282	-37.0519
GO:0002449 lymphocyte mediated immunity	92	1.45998	6.9849	6.21162	2.86276	1.10132
GO:0072330 monocarboxylic acid biosynthetic process	59	1.53866	6.98242	6.21019	1.64241	-37.0519
GO:0070663 regulation of leukocyte proliferation	81	1.4789	6.94933	6.1745	2.20395	-0.182891
JOHNSTONE_PARVB_TARGETS_2_UP	81	1.47796	6.93721	6.16226	5.04009	3.93226
GO:1902107 positive regulation of leukocyte differentiation	55	1.54328	6.88538	6.10548	0.388222	-37.0519
GO:0002683 negative regulation of immune system process	123	1.40246	6.82444	6.03919	5.85233	4.86196
GO:0002696 positive regulation of leukocyte activation	131	1.39301	6.82398	6.03919	4.01932	2.69884
GO:0007162 negative regulation of cell adhesion	73	1.48605	6.8128	6.02794	3.23487	1.65462
GO:0000187 activation of MAPK activity	58	1.5229	6.76539	5.97592	-0.00909239	-37.0519
GO:0002250 adaptive immune response	114	1.4084	6.74178	5.95093	5.41865	4.36324
GO:0050867 positive regulation of cell activation	136	1.38218	6.74088	5.95093	2.92974	1.21378
GO:0030135 coated vesicle	112	1.40885	6.70891	5.91619	4.27181	3.01309
GO:0090087 regulation of peptide transport	85	1.45207	6.70535	5.91346	4.69628	3.52199
GO:0002460 adaptive immune response based on somatic recombination of immune receptors built from immunoglobulin superfamily domains	101	1.42263	6.67877	5.88477	3.35067	1.82323
GO:0019882 antigen processing and presentation	149	1.36506	6.67427	5.88097	3.05139	1.3896
GO:0002697 regulation of immune effector process	124	1.3881	6.62508	5.82669	6.46338	5.54421
FOSTER_KDM1A_TARGETS_UP	67	1.48495	6.61749	5.81938	1.60537	-37.0519
GO:0072331 signal transduction by p53 class mediator	109	1.40425	6.58208	5.7806	2.95361	1.24781
GO:0006457 protein folding	131	1.37592	6.55892	5.75564	5.81093	4.81486
WANG_CISPLATIN_RESPONSE_AND_XPC_UP	72	1.46581	6.53051	5.72471	1.10144	-37.0519
GO:0050730 regulation of peptidyl-tyrosine phosphorylation	64	1.48372	6.50774	5.70015	0.759727	-37.0519
GO:0002694 regulation of leukocyte activation	182	1.32842	6.50485	5.69812	5.00011	3.88806
SATO_SILENCED_BY_METHYLATION_IN_PANCREATIC_CANCER_1	104	1.40326	6.46624	5.65553	2.17084	-0.278577
GO:0043406 positive regulation of MAP kinase activity	75	1.4504	6.41954	5.60367	1.07757	-37.0519
GO:0005924 cell-substrate adherens junction	220	1.29919	6.39512	5.57815	8.70279	8.00743
GO:0005925 focal adhesion	220	1.29918	6.39493	5.57815	6.94512	6.07725
ALCALA_APOPTOSIS	74	1.45049	6.39301	5.57719	1.5805	-37.0519
GO:0030055 cell-substrate junction	222	1.29654	6.36468	5.54614	9.5283	8.8923
GO:2001234 negative regulation of apoptotic signaling pathway	86	1.4226	6.33605	5.51471	2.28458	0.0315644
GO:0008630 intrinsic apoptotic signaling pathway in response to DNA damage	58	1.47831	6.24532	5.41223	0.785332	-37.0519
PENG_LEUCINE_DEPRIVATION_DN	143	1.34339	6.22864	5.39435	4.70948	3.53709
GAVIN_FOXP3_TARGETS_CLUSTER_P3	70	1.44342	6.19057	5.35192	1.49418	-37.0519
GO:0051249 regulation of lymphocyte activation	167	1.32	6.16597	5.3249	3.75681	2.38495
GO:0002443 leukocyte mediated immunity	122	1.3601	6.15885	5.31794	5.24619	4.16409
GO:1902105 regulation of leukocyte differentiation	92	1.39304	6.06565	5.21185	3.43356	1.94824
MORI_PRE_BI_LYMPHOCYTE_DN	68	1.43403	6.01434	5.1538	0.523441	-37.0519
GO:2001020 regulation of response to DNA damage stimulus	70	1.42904	6.0072	5.14678	0.126002	-37.0519
CHAUHAN_RESPONSE_TO_METHOXYESTRADIOL_DN	90	1.38953	5.97211	5.10738	1.34398	-37.0519
GO:0043405 regulation of MAP kinase activity	110	1.36141	5.96528	5.1007	1.83838	-37.0519
JISON_SICKLE_CELL_DISEASE_DN	140	1.32992	5.96141	5.09743	5.59472	4.57067
GO:0050900 leukocyte migration	101	1.37168	5.94615	5.08096	2.09156	-0.546613
GO:0042886 amide transport	107	1.36163	5.91284	5.04352	3.89564	2.55353
GO:1903708 positive regulation of hemopoiesis	69	1.42169	5.88498	5.01357	0.673257	-37.0519
GO:0032147 activation of protein kinase activity	104	1.36365	5.88602	5.01357	1.45604	-37.0519
GO:0051051 negative regulation of transport	148	1.31756	5.86865	4.99577	2.8855	1.13743
GO:0015833 peptide transport	104	1.35931	5.82126	4.94178	2.24555	-0.0644384
GO:0005912 adherens junction	237	1.26146	5.80944	4.92919	12.413	11.915
GO:2001242 regulation of intrinsic apoptotic signaling pathway	77	1.39967	5.80634	4.92678	1.12866	-37.0519
GO:0070161 anchoring junction	240	1.25919	5.78961	4.90845	10.0953	9.4947
IGLESIAS_E2F_TARGETS_UP	71	1.39769	5.62652	4.7183	0.952172	-37.0519
GO:0051082 unfolded protein binding	61	1.41346	5.5503	4.62947	3.83941	2.48995
CASORELLI_ACUTE_PROMYELOCYTIC_LEUKEMIA_DN	380	1.2046	5.52509	4.60082	14.9765	14.5642
GO:0030659 cytoplasmic vesicle membrane	184	1.27203	5.49416	4.56535	3.99845	2.67302
GO:0046651 lymphocyte proliferation	112	1.3275	5.47773	4.54816	2.01952	-0.883846
GO:0032943 mononuclear cell proliferation	112	1.32749	5.47761	4.54816	1.73127	-37.0519
GO:0071902 positive regulation of protein serine/threonine kinase activity	101	1.33936	5.46418	4.53342	0.447865	-37.0519
GO:0005770 late endosome	114	1.32374	5.45217	4.52036	0.99293	-37.0519
FLECHNER_BIOPSY_KIDNEY_TRANSPLANT_REJECTED_VS_OK_UP	51	1.32194	5.37084	4.42449	0.443692	-37.0519
GO:0031301 integral component of organelle membrane	134	1.2992	5.35925	4.41185	2.1884	-0.233315
GO:0070661 leukocyte proliferation	114	1.31778	5.35746	4.41122	1.2919	-37.0519
GO:0044819 mitotic G1/S transition checkpoint	60	1.30431	5.35666	4.41122	0.807685	-37.0519
HOSHIDA_LIVER_CANCER_SUBCLASS_S1	129	1.29958	5.29322	4.33631	1.98292	-1.11964
GO:0012506 vesicle membrane	192	1.25513	5.25254	4.28854	4.52886	3.31683
GO:0016053 organic acid biosynthetic process	103	1.32279	5.24704	4.28439	2.62604	0.716229
GO:0018212 peptidyl-tyrosine modification	104	1.32166	5.24734	4.28439	1.07348	-37.0519
GO:0046394 carboxylic acid biosynthetic process	103	1.32271	5.24585	4.28418	1.24122	-37.0519
THUM_SYSTOLIC_HEART_FAILURE_UP	232	1.23544	5.22334	4.25824	4.43765	3.20957
GO:0018108 peptidyl-tyrosine phosphorylation	103	1.31921	5.19155	4.22102	0.816772	-37.0519
GO:0031300 intrinsic component of organelle membrane	139	1.28278	5.1463	4.16738	2.41368	0.32008
GO:0005765 lysosomal membrane	146	1.27715	5.13926	4.16006	3.48102	2.00516
GO:0031571 mitotic G1 DNA damage checkpoint	60	1.30353	5.13762	4.1593	1.17079	-37.0519
GO:0030217 T cell differentiation	91	1.33026	5.1356	4.15806	0.617495	-37.0519
REACTOME_ADAPTIVE_IMMUNE_SYSTEM	337	1.19697	5.08522	4.09796	4.02495	2.70492
GO:0051436 negative regulation of ubiquitin-protein ligase activity involved in mitotic cell cycle	53	1.39471	5.07068	4.08144	1.45775	-37.0519
GO:1903706 regulation of hemopoiesis	129	1.28336	5.0184	4.0187	1.90255	-37.0519
GO:0071900 regulation of protein serine/threonine kinase activity	181	1.24772	4.99462	3.99074	2.39264	0.277865
SWEET_LUNG_CANCER_KRAS_UP	258	1.21535	4.99344	3.99054	3.40192	1.9024
KIM_ALL_DISORDERS_OLIGODENDROCYTE_NUMBER_CORR_UP	486	1.16544	4.97521	3.96936	3.95986	2.62923
ZAMORA_NOS2_TARGETS_DN	51	1.39058	4.95554	3.94638	2.9263	1.2091
GO:0044783 G1 DNA damage checkpoint	61	1.29978	4.93029	3.91647	1.2357	-37.0519
GO:0051352 negative regulation of ligase activity	57	1.3693	4.87134	3.84537	1.79481	-37.0519
GO:0051444 negative regulation of ubiquitin-protein transferase activity	57	1.36926	4.87085	3.84537	1.73584	-37.0519
GO:0030335 positive regulation of cell migration	100	1.30107	4.85484	3.82673	0.090664	-37.0519
ZHONG_SECRETOME_OF_LUNG_CANCER_AND_FIBROBLAST	82	1.26858	4.84596	3.81694	4.56676	3.36079
PENG_RAPAMYCIN_RESPONSE_DN	182	1.23573	4.76866	3.72171	6.66508	5.76711
GO:2001233 regulation of apoptotic signaling pathway	178	1.23721	4.75759	3.70909	2.95953	1.2534
GO:0042113 B cell activation	121	1.27383	4.74116	3.68974	2.27277	0.00882778
GO:0005774 vacuolar membrane	168	1.24149	4.73663	3.6853	1.66594	-37.0519
WANG_RESPONSE_TO_GSK3_INHIBITOR_SB216763_UP	239	1.20969	4.72225	3.66849	5.43704	4.38353
GO:2000147 positive regulation of cell motility	104	1.28838	4.72026	3.66722	0.213422	-37.0519
GO:0006631 fatty acid metabolic process	121	1.27237	4.71615	3.6633	1.46165	-37.0519
GO:0072395 signal transduction involved in cell cycle checkpoint	58	1.29957	4.69534	3.63907	1.00211	-37.0519
GO:0072422 signal transduction involved in DNA damage checkpoint	58	1.29954	4.69446	3.63907	0.740695	-37.0519
GO:0071346 cellular response to interferon-gamma	65	1.28782	4.69395	3.63907	3.77572	2.40583
GO:0001819 positive regulation of cytokine production	146	1.25223	4.68865	3.63362	0.833658	-37.0519
YAGI_AML_WITH_T_8_21_TRANSLOCATION	209	1.21917	4.6812	3.62546	3.87404	2.52777
GO:0006112 energy reserve metabolic process	62	1.29215	4.67931	3.6243	1.7341	-37.0519
GO:0072401 signal transduction involved in DNA integrity checkpoint	58	1.29883	4.67386	3.61865	0.521165	-37.0519
MUELLER_PLURINET	186	1.19426	4.66457	3.60814	4.19372	2.90995
GARY_CD5_TARGETS_UP	334	1.18013	4.64347	3.5827	6.91401	6.0443
CAMP_UP.V1_UP	143	1.2517	4.64247	3.58265	1.69888	-37.0519
GO:0040017 positive regulation of locomotion	108	1.27879	4.62832	3.56596	0.24857	-37.0519
GO:0006959 humoral immune response	56	1.35251	4.62505	3.56302	0.49407	-37.0519
BILBAN_B_CLL_LPL_UP	54	1.35682	4.623	3.56163	0.22492	-37.0519
GO:0032273 positive regulation of protein polymerization	54	1.30384	4.61072	3.54728	0.528825	-37.0519
GO:0032103 positive regulation of response to external stimulus	61	1.2909	4.60225	3.53773	-2.25981	-37.0519
GO:0051437 positive regulation of ubiquitin-protein ligase activity involved in regulation of mitotic cell cycle transition	57	1.34775	4.59088	3.5245	1.67888	-37.0519
GO:1903321 negative regulation of protein modification by small protein conjugation or removal	84	1.30277	4.58542	3.51876	3.33182	1.79604
GO:0007254 JNK cascade	72	1.31698	4.54258	3.46542	1.03983	-37.0519
GO:0051439 regulation of ubiquitin-protein ligase activity involved in mitotic cell cycle	58	1.34103	4.52943	3.44983	1.63218	-37.0519
REACTOME_GPCR_DOWNSTREAM_SIGNALING	89	1.25034	4.50422	3.41878	3.47032	1.99511
ENK_UV_RESPONSE_KERATINOCYTE_UP	301	1.15641	4.49471	3.40779	11.8049	11.2842
GO:0051272 positive regulation of cellular component movement	110	1.26872	4.49166	3.40508	0.550199	-37.0519
GO:0090287 regulation of cellular response to growth factor stimulus	61	1.28543	4.48466	3.39729	0.708354	-37.0519
BASSO_CD40_SIGNALING_UP	68	1.27397	4.46942	3.37891	-2.95717	-37.0519
MORI_MATURE_B_LYMPHOCYTE_UP	72	1.31158	4.465	3.37444	-1.96382	-37.0519
GO:0060333 interferon-gamma-mediated signaling pathway	60	1.28504	4.44621	3.35144	4.46103	3.2368
GO:0048872 homeostasis of number of cells	113	1.22599	4.42567	3.32614	0.213105	-37.0519
MUNSHI_MULTIPLE_MYELOMA_UP	52	1.34551	4.41817	3.31885	2.16057	-0.314264
GO:0031397 negative regulation of protein ubiquitination	80	1.297	4.41887	3.31885	2.00917	-0.933397
GO:0002237 response to molecule of bacterial origin	92	1.24299	4.40986	3.3093	1.69635	-37.0519
GO:0051438 regulation of ubiquitin-protein transferase activity	73	1.26391	4.40638	3.30597	1.32378	-37.0519
GO:0006977 DNA damage response, signal transduction by p53 class mediator resulting in cell cycle arrest	54	1.33918	4.39374	3.29089	0.895175	-37.0519
GO:0007179 transforming growth factor beta receptor signaling pathway	84	1.25027	4.39285	3.29089	1.45541	-37.0519
GO:0044437 vacuolar part	190	1.18415	4.39199	3.29089	1.94106	-1.54303
GO:0030098 lymphocyte differentiation	131	1.24594	4.38745	3.28619	0.768186	-37.0519
GO:0051340 regulation of ligase activity	75	1.26007	4.38201	3.28032	1.45267	-37.0519
GO:0070372 regulation of ERK1 and ERK2 cascade	52	1.34245	4.37846	3.27688	-2.30786	-37.0519
GO:0002474 antigen processing and presentation of peptide antigen via MHC class I	83	1.25039	4.37448	3.27288	1.69396	-37.0519
GO:0034142 toll-like receptor 4 signaling pathway	57	1.28572	4.36977	3.26793	1.63411	-37.0519
KEGG_CHEMOKINE_SIGNALING_PATHWAY	71	1.26436	4.367	3.2655	0.980844	-37.0519
GO:0046328 regulation of JNK cascade	56	1.33224	4.35778	3.2547	1.52588	-37.0519
GO:2000060 positive regulation of protein ubiquitination involved in ubiquitin-dependent protein catabolic process	64	1.2735	4.35452	3.25161	1.07852	-37.0519
GO:0002479 antigen processing and presentation of exogenous peptide antigen via MHC class I, TAP-dependent	65	1.31478	4.34912	3.24575	1.35457	-37.0519
GO:0072431 signal transduction involved in mitotic G1 DNA damage checkpoint	55	1.33067	4.30921	3.19496	0.929476	-37.0519
GO:1902400 intracellular signal transduction involved in G1 DNA damage checkpoint	55	1.32986	4.29847	3.18209	0.514113	-37.0519
GOLDRATH_ANTIGEN_RESPONSE	158	1.22371	4.28379	3.16404	1.94949	-1.46244
GO:0007623 circadian rhythm	81	1.28609	4.27313	3.15124	1.18047	-37.0519
YAO_TEMPORAL_RESPONSE_TO_PROGESTERONE_CLUSTER_11	62	1.27139	4.27106	3.14968	3.6085	2.1824
GO:0051351 positive regulation of ligase activity	67	1.30581	4.26896	3.14807	1.3997	-37.0519
GO:2000058 regulation of protein ubiquitination involved in ubiquitin-dependent protein catabolic process	68	1.26233	4.26492	3.14392	1.39214	-37.0519
GO:0001101 response to acid chemical	87	1.23982	4.25845	3.13659	0.756917	-37.0519
GO:0090092 regulation of transmembrane receptor protein serine/threonine kinase signaling pathway	59	1.31801	4.24507	3.12016	0.891317	-37.0519
GO:0051443 positive regulation of ubiquitin-protein transferase activity	66	1.30422	4.22309	3.09239	1.20944	-37.0519
GO:0032872 regulation of stress-activated MAPK cascade	69	1.25819	4.22033	3.0899	0.518087	-37.0519
GO:0051403 stress-activated MAPK cascade	100	1.26172	4.21896	3.08924	2.38347	0.261257
GO:0070371 ERK1 and ERK2 cascade	56	1.32175	4.21697	3.08775	-4.1427	-37.0519
GO:2000134 negative regulation of G1/S transition of mitotic cell cycle	74	1.25148	4.21444	3.08556	0.755818	-37.0519
GO:0032496 response to lipopolysaccharide	87	1.27412	4.19931	3.06786	3.85104	2.49982
GO:1902807 negative regulation of cell cycle G1/S phase transition	74	1.25058	4.19991	3.06786	1.16755	-37.0519
STK33_NOMO_DN	88	1.27281	4.19651	3.06529	2.44902	0.388152
KLEIN_PRIMARY_EFFUSION_LYMPHOMA_DN	53	1.28083	4.18779	3.0549	0.9027	-37.0519
GO:0043393 regulation of protein binding	65	1.26128	4.18357	3.05045	2.78729	0.984684
GO:0034138 toll-like receptor 3 signaling pathway	50	1.28533	4.17155	3.03566	-0.311359	-37.0519
GO:0071156 regulation of cell cycle arrest	66	1.2999	4.16112	3.02297	1.95028	-1.46138
GO:0032479 regulation of type I interferon production	80	1.24064	4.15045	3.00995	1.73086	-37.0519
GO:0030666 endocytic vesicle membrane	57	1.27108	4.14791	3.0077	-4.26111	-37.0519
GO:0071158 positive regulation of cell cycle arrest	57	1.3142	4.14092	2.99953	1.35106	-37.0519
GUTIERREZ_CHRONIC_LYMPHOCYTIC_LEUKEMIA_DN	52	1.32389	4.1352	2.99305	-0.509629	-37.0519
BERENJENO_TRANSFORMED_BY_RHOA_UP	292	1.16957	4.13178	2.98962	9.1364	8.47378
GO:0032481 positive regulation of type I interferon production	57	1.31318	4.12701	2.9854	0.603561	-37.0519
GO:0097285 cell-type specific apoptotic process	155	1.21736	4.12695	2.9854	1.08224	-37.0519
GO:0031098 stress-activated protein kinase signaling cascade	102	1.25392	4.1198	2.97757	1.88716	-37.0519
KIM_BIPOLAR_DISORDER_OLIGODENDROCYTE_DENSITY_CORR_UP	482	1.11836	4.1194	2.97757	6.51916	5.60631
GO:0042590 antigen processing and presentation of exogenous peptide antigen via MHC class I	67	1.2953	4.11753	2.97617	4.07873	2.76928
GO:0097193 intrinsic apoptotic signaling pathway	167	1.21057	4.1139	2.97245	2.36722	0.226602
PELLICCIOTTA_HDAC_IN_ANTIGEN_PRESENTATION_UP	55	1.27154	4.10704	2.96441	3.66473	2.26032
GO:1902403 signal transduction involved in mitotic DNA integrity checkpoint	57	1.31112	4.09874	2.95714	0.4205	-37.0519
GO:1902402 signal transduction involved in mitotic DNA damage checkpoint	57	1.31109	4.09833	2.95714	1.08952	-37.0519
GO:0070302 regulation of stress-activated protein kinase signaling cascade	70	1.24908	4.09996	2.95714	0.648824	-37.0519
GO:1902806 regulation of cell cycle G1/S phase transition	91	1.22661	4.09891	2.95714	1.83416	-37.0519
GO:0016887 ATPase activity	222	1.18757	4.09453	2.95316	4.90384	3.77231
GO:0072413 signal transduction involved in mitotic cell cycle checkpoint	57	1.31059	4.09152	2.95022	0.634739	-37.0519
GO:0051924 regulation of calcium ion transport	54	1.2699	4.06083	2.91031	2.08532	-0.574774
GO:0032845 negative regulation of homeostatic process	59	1.26001	4.03663	2.88003	-2.67769	-37.0519
GO:0031398 positive regulation of protein ubiquitination	102	1.21375	4.03733	2.88003	3.99479	2.67152
GO:0016324 apical plasma membrane	55	1.26582	4.0283	2.87099	3.61938	2.19716
GO:1903322 positive regulation of protein modification by small protein conjugation or removal	109	1.20809	4.02885	2.87099	1.23505	-37.0519
GO:0000302 response to reactive oxygen species	82	1.23074	4.02644	2.86957	0.363338	-37.0519
GO:0042623 ATPase activity, coupled	161	1.17893	4.0151	2.85538	4.01517	2.69483
GO:0051092 positive regulation of NF-kappaB transcription factor activity	63	1.25219	4.0091	2.84838	0.407248	-37.0519
YOSHIMURA_MAPK8_TARGETS_UP	338	1.13184	3.97564	2.80425	4.16456	2.8716
GO:0032606 type I interferon production	82	1.22731	3.97279	2.80147	1.21962	-37.0519
LEI_MYB_TARGETS	162	1.17602	3.96514	2.79219	3.50977	2.04276
GO:2000045 regulation of G1/S transition of mitotic cell cycle	89	1.21874	3.94176	2.76164	1.73318	-37.0519
SANSOM_APC_TARGETS_DN	132	1.189	3.94107	2.76164	4.67694	3.49888
GO:0006986 response to unfolded protein	93	1.21367	3.91585	2.72833	3.99556	2.67152
GO:0034341 response to interferon-gamma	75	1.23006	3.90318	2.71207	3.28794	1.73087
GO:0071560 cellular response to transforming growth factor beta stimulus	90	1.2147	3.89143	2.69706	1.59226	-37.0519
GO:0071559 response to transforming growth factor beta	90	1.2146	3.88974	2.69583	1.77271	-37.0519
HILLION_HMGA1B_TARGETS	51	1.2617	3.88191	2.68616	4.87946	3.74331
GO:0031145 anaphase-promoting complex-dependent proteasomal ubiquitin-dependent protein catabolic process	72	1.23066	3.86231	2.66029	0.893739	-37.0519
GO:0090090 negative regulation of canonical Wnt signaling pathway	71	1.23083	3.84802	2.64165	1.50975	-37.0519
GO:0031334 positive regulation of protein complex assembly	83	1.21683	3.82558	2.61167	1.4761	-37.0519
GO:0007204 positive regulation of cytosolic calcium ion concentration	61	1.24177	3.82387	2.61041	-0.34015	-37.0519
SANA_RESPONSE_TO_IFNG_DN	56	1.24825	3.81279	2.59721	3.75548	2.3847
GO:0090263 positive regulation of canonical Wnt signaling pathway	67	1.23318	3.81317	2.59721	0.43463	-37.0519
MATSUDA_NATURAL_KILLER_DIFFERENTIATION	205	1.15311	3.80116	2.58213	2.81358	1.02428
PURBEY_TARGETS_OF_CTBP1_AND_SATB1_DN	88	1.20967	3.78428	2.55968	-1.6805	-37.0519
GO:0000187 activation of MAPK activity	58	1.24303	3.78274	2.55864	-4.30292	-37.0519
LI_AMPLIFIED_IN_LUNG_CANCER	104	1.19706	3.78125	2.55766	6.13033	5.17474
GO:0060326 cell chemotaxis	50	1.25526	3.77575	2.55108	-4.34435	-37.0519
GO:0035966 response to topologically incorrect protein	98	1.20099	3.77432	2.55017	1.9772	-1.16171
WIERENGA_STAT5A_TARGETS_UP	72	1.2243	3.76908	2.54503	0.599165	-37.0519
HOSHIDA_LIVER_CANCER_SUBCLASS_S1	129	1.18123	3.76972	2.54503	-0.771385	-37.0519
GO:0031349 positive regulation of defense response	117	1.18715	3.75522	2.52671	1.14528	-37.0519
GO:0050727 regulation of inflammatory response	72	1.22192	3.73426	2.49835	0.475494	-37.0519
MORI_SMALL_PRE_BII_LYMPHOCYTE_UP	51	1.24915	3.7188	2.47766	2.59884	0.670079
GO:0008064 regulation of actin polymerization or depolymerization	77	1.21441	3.70032	2.45333	2.07313	-0.619828
GO:0030832 regulation of actin filament length	77	1.21439	3.70005	2.45333	0.609329	-37.0519
GO:0030330 DNA damage response, signal transduction by p53 class mediator	77	1.21421	3.69731	2.45056	-3.16513	-37.0519
GO:1903320 regulation of protein modification by small protein conjugation or removal	149	1.16745	3.69048	2.44197	1.53561	-37.0519
GO:0019882 antigen processing and presentation	149	1.16615	3.66559	2.40766	-0.965673	-37.0519
GO:0010959 regulation of metal ion transport	84	1.2049	3.65541	2.39424	2.47825	0.435848
GO:0003823 antigen binding	50	1.24547	3.64951	2.38786	-4.04779	-37.0519
TARTE_PLASMA_CELL_VS_PLASMABLAST_DN	218	1.14261	3.6494	2.38786	4.33224	3.08214
GO:0051495 positive regulation of cytoskeleton organization	77	1.20979	3.63095	2.36254	0.475963	-37.0519
WALLACE_PROSTATE_CANCER_RACE_UP	137	1.16871	3.61295	2.33775	1.73808	-37.0519
GO:0034340 response to type I interferon	50	1.24239	3.60969	2.33571	1.47502	-37.0519
GO:0032956 regulation of actin cytoskeleton organization	111	1.18234	3.60921	2.33571	2.62658	0.716229
MARKEY_RB1_ACUTE_LOF_UP	113	1.18116	3.6098	2.33571	6.26321	5.32103
GO:0002224 toll-like receptor signaling pathway	74	1.20894	3.57399	2.28584	1.13629	-37.0519
GO:0071456 cellular response to hypoxia	53	1.2335	3.55582	2.2605	-1.67737	-37.0519
GO:0050852 T cell receptor signaling pathway	68	1.21342	3.54683	2.2485	-1.72402	-37.0519
GO:0008154 actin polymerization or depolymerization	79	1.20107	3.52779	2.22234	1.54271	-37.0519
GO:0050870 positive regulation of T cell activation	96	1.18733	3.52742	2.22234	-1.39802	-37.0519
GO:0051480 cytosolic calcium ion homeostasis	65	1.21419	3.50918	2.19732	-0.373267	-37.0519
GO:0006816 calcium ion transport	97	1.18549	3.50888	2.19732	0.727318	-37.0519
BLALOCK_ALZHEIMERS_DISEASE_INCIPIENT_DN	106	1.17926	3.50421	2.19159	2.78658	0.984684
REACTOME_SIGNALING_BY_GPCR	121	1.17057	3.50276	2.19058	0.786625	-37.0519
GO:0043405 regulation of MAP kinase activity	110	1.17601	3.49025	2.17323	-1.78422	-37.0519
GO:0032993 protein-DNA complex	68	1.20889	3.48151	2.16142	7.2731	6.43817
GO:0007050 cell cycle arrest	128	1.16567	3.47842	2.15912	0.808954	-37.0519
CHEN_METABOLIC_SYNDROM_NETWORK	488	1.09715	3.47859	2.15912	4.63552	3.44693
GO:0044773 mitotic DNA damage checkpoint	78	1.19775	3.46357	2.13819	0.720849	-37.0519
GO:0042770 signal transduction in response to DNA damage	88	1.189	3.45833	2.1323	-4.11191	-37.0519
GO:0009101 glycoprotein biosynthetic process	148	1.15575	3.45808	2.1323	2.30696	0.0849899
GO:1903039 positive regulation of leukocyte cell-cell adhesion	97	1.18202	3.45197	2.12433	-2.38209	-37.0519
GO:0034112 positive regulation of homotypic cell-cell adhesion	97	1.18186	3.44929	2.12146	-3.01037	-37.0519
CHAUHAN_RESPONSE_TO_METHOXYESTRADIOL_DN	90	1.18669	3.44585	2.11747	-4.47255	-37.0519
GO:0030177 positive regulation of Wnt signaling pathway	82	1.19295	3.44376	2.11571	0.354229	-37.0519
HELLER_HDAC_TARGETS_DN	152	1.1534	3.44316	2.11571	4.04104	2.72574
GO:0036294 cellular response to decreased oxygen levels	54	1.2233	3.44004	2.11219	-0.460075	-37.0519
GO:1902532 negative regulation of intracellular signal transduction	189	1.14039	3.42964	2.09776	1.78386	-37.0519
GO:0048511 rhythmic process	113	1.17055	3.42579	2.09313	1.08509	-37.0519
GO:1901990 regulation of mitotic cell cycle phase transition	135	1.15935	3.42217	2.08882	2.29728	0.0595763
GO:0002221 pattern recognition receptor signaling pathway	87	1.18665	3.40872	2.06975	1.05134	-37.0519
TONKS_TARGETS_OF_RUNX1_RUNX1T1_FUSION_HSC_DN	84	1.18666	3.37162	2.01475	0.622226	-37.0519
GO:0010810 regulation of cell-substrate adhesion	57	1.21402	3.37	2.01343	-0.739574	-37.0519
GO:0032970 regulation of actin filament-based process	120	1.16332	3.36426	2.00585	1.71055	-37.0519
GO:0007163 establishment or maintenance of cell polarity	68	1.20005	3.35345	1.99051	-0.205016	-37.0519
GO:0044774 mitotic DNA integrity checkpoint	80	1.18857	3.35007	1.98651	0.559569	-37.0519
GO:0060070 canonical Wnt signaling pathway	111	1.16719	3.34787	1.9843	1.39007	-37.0519
