# Supplementary material for: Integrated single-cell genetic and transcriptional analysis suggests novel drivers of chronic lymphocytic leukemia
Source: HighWire-hosted journal article supplement (doi:10.1101/gr.217331.116), 2017-07-05
Supplement: Supplemental_Table_S6_.xlsx [file Supplemental_Table_S6_.xlsx]

## Sheet: Gene expression 1
Table 6. Primer sequences for Biomark gene expression and mutation detection assays
	Preamp forward primer	Preamp reverse primer	Assay forward primer	Assay reverse primer
ABLIM1	cgaTCAGAGAGGTGGACAGAACCA	cgtTCATGTCGTTGCGTCTCCAA	acgGGCTGGAGCGCCACTTA	cgtGAGGTAACCTGTCAAACTCCTGT
ACTB	cgaAAGGCCAACCGCGAGAA	cgtCATCACGATGCCAGTGGTAC	cgaGATGACCCAGATCATGTTTGAGAC	cgtAGCACAGCCTGGATAGCAA
ADAR	cgaGTGACAAAATCCTACGCTGGAAC	cgtTCAGATGCCCTTGGCTGAAA	cgaTGCAAGGGGCACTGTT	cgtAGGTAACCCAATGTGACAGA
ALDOA	cgaAAGTGGCGTTGTGTGCTGAA	cgtGCTCCACGATGGGCACAA	cgaAGCCCTCGCCATCATGGAA	cgtATTCTGCTGGCAGATACTGGCATA
AQP3	cgaCCCACGGTGGTTTCCTCA	cgtAAGCACATGGCAAAGGTCAC	cgaCATCAACCTGGCCTTTGGCTTT	cgtGTTCAGGTGGGCCCCAGAG
ARAF	cgaACCTCCATGCCAAGAACATCA	cgtCCGCTCCATCGAGTCTTCA	cgaTCCACCGAGATCTCAAGTCTAACA	cgtCCAAGCCAAAGTCACCGATCT
ATHL1	acgGGTTTGCCCTGAGGACATTTAC	cgtGCCACCAGCCTCTCGAAATA	acgGTCCAGGAGGTCCACGTCAA	cgtCTGCAGGTCCTGGGTGGTA
ATM	cgaGCACAGAAGTGCCTCCAA	tcgTCTGGCACGCTTTGGAAA	cgaCTCATCTTGTACTGGAGAAAATTC	cgtAATTCATTGCAGCTTTACAGTTT
B2M	cgaAGAGGTGGGGAGCAGAGAA	cgtCCCCAAATTCTAAGCAGAGTATGTAAA	cgaCCAACATCAACATCTTGGTCAG	cgtAGTTAACTTATGCACGCTTAACTATC
BCL11A	acgGGAATTTGCCCCAAACAGGAA	tcgGGCATATTCTGCACTCATCCC	cgaTAGCAGATAAACTTCTGCACTG	cgtGTGGGGATTAGAGCTCCAT
BMI1	cgaGGAGGCGGCATGAGAC	cgtAGTTAAAAGTCGTTCAGCAGAAAA	cgaCGCGCTGGTTGCCCAT	cgtGAGCCAAGCGGCCATCTT
CD14	cgaTCTGCAACTTCTCCGAACC	cgtCATCGACGCGCTTTAGAAAC	cgaAGCCCGACTGGTCCGAAG	cgtAGACCGCCGGCATGGAT
CD19	cgaCACAGCTCAAGACGCTGGAA	cgtTTCCAGCCACCAGTCCTCA	cgaGTCACCGTGGCAACCT	cgtGCAGCCAGTGCCATAGTA
CD2	cgaCACAGCAGGGAACAAAGTCA	cgtCAGTGCCACAAAGACCATCA	cgaTGTCAGCTGTCCAGAGAAAGGT	cgtAGGCTGCCTCCTCCACATAT
CD247	cgaTTGGCCTGCTGGATCCC	cgtTTCTGGCCCTGCTGGTAC	acgAACTCTGCTACCTGCTGGATG	cgtTGCGCTCCTGCTGAACTT
CD27	cgaGAGAGCTGTCGGCACTGTAA	cgtATCACACTCGGTGCACTCC	cgaTGGTCTTCTCGTTCGCAACTG	cgtCCTGCACTGCCAGCCATT
CD33	cgaATGTTCCACAGAACCCAACAAC	cgtGAGCGAGCAGGGCTGTA	cgaGAGATGGCTCAGGGAAACAA	cgtCTCCTCCAATGGCCCCATG
CD34	cgaTTCCAGCAAACTCCAACTTATGAAA	tcgGCAATCAGGGTCTTTTGGGAA	cgaAAGCACCAATCTGACCTGAA	cgtTCTGGTGGCTTGCAACAT
CD38	cgaATGTGATGCTCAATGGATCCC	cgtCATGTATCACCCAGGCCTCTA	cgaAAAACAGCACTTTTGGGAGTGT	cgtGTGTCTGAACCTTCTCTGGTTG
CD3D	cgaCGTTTCTCTCTGGCCTGGTA	cgtCTCTACCCATGTGATGCTGGTA	cgaGCTACCCTTCTCTCGCAAGT	cgtGCAATTCACAAACACTCTGTCCT
CD3E	cgaGGCTTGCTGCTGCTGGTTTA	cgtAACAGGTGGTGGCCTCTCC	cgaAGGCCAAGGCCAAGCCTGT	cgtTTGTTTTGTCCCCTTTGCCTGC
CD3G	cgaTGGGAAGTAATGCCAAGGAC	cgtTGGTGGCTGCATTTAGTTCA	cgaCCTCGAGGGATGTATCAGTGTA	cgtTGACACATTCTGTAATACACTTGGAG
CD5	cgaATTGGCCCAACGGGAATGAA	tcgGGGAGGTTGGCTGTATTCGTTA	cgaCAAAACATGTCTTTCCATCGCAACC	cgtTCCACGTGGGAGGCTGTG
CD69	cgaAGCTGGACTTCAGCCCAAAA	cgtTCCAACCCAGTGTTCCTCTCTA	cgaGTTCTGAACATGGTGCTACTC	cgtCCTGCGTATCGTTTTAGAAAGT
CD7	cgaACAACCTGACTATCACCATGCA	cgtCGAGCATCTGTGCCATCC	cgaGTCGGACACTGGCACCTA	tcgTGGGACTGTTCCTCTGTCAC
CDKN1A	cgaGACCTGTCACTGTCTTGTACCC	cgtCGGCGTTTGGAGTGGTAGAA	cgaTTGTGCCTCGCTCAGG	cgtGTCTGCCGCCGTTTTC
CEBPA	cgaAGCTGACCAGTGACAATGAC	cgtTTGCCCATGGCCTTGAC	cgaCGCAAGCGGGTGGAACAG	cgtTGGCAGCTGGCGGAAGAT
CTNNB1	cgaCAAGTCCTGTATGAGTGGGAACA	cgtAGGGAACATAGCAGCTCGTAC	cgaCTCAGTCCTTCACTCAAGAACAAGT	cgtCTCTGAGCTCGAGTCATTGCAT
CTSB	cgaGCTATCCTGCTGAAGCTTGGAA	cgtCGTTGACGTGGTGCTCAC	cgaTTCTGGACAAGAAAAGGCCTGGTT	cgtGGGAGGGATGGAGTACGGTCT
CTSW	acgCTGGACATCTTTGCCCACAA	cgtCATAGAGCTGGCCAAACTCC	cgaCTGGCCCAGGCTCAGA	cgtGAATGGAGTCACCCCAAACTC
DDX3X	cgaTGCTTGACCTCCTAAATGCA	cgtTGCTGGTACATGCGTATCC	cgaACAGGCAAGGATTCACTGACCTTAG	cgtCCTCCAGAGAATCTGCACCCTTTT
DFFA	cgaAAGTGCGTCAGTCCAAGCA	cgtTCTACTGCATCCACCTCCTCA	cgaGCTCCTGCAGCTGTACCT	cgtCAAAGGCAGCTTTGGACTCTT
DGKA	cgaCCTAAGCCTGGCACTGTTTCAA	cgtACCACCCTCCAGAAGGGAAAA	cgaCTTTGAGACTGGTCACTGCTTA	cgtGTAGCAGGAAACATCATTGAGAC
DNTT	cgaCCAGTATGCGTGTCAGAGAA	tcgAAATGTCACACAGGAGTCTTCA	cgaGAACCACTTTAAACAACTGTAACCAGAT	cgtTCTAAACTCACAGTTTTCAGCCAGTA
EBF1	cgaTGGTGTTGTGGAAGTCACAC	cgtCCTTCTGTAACCTCTGGAAACC	acgAGCAGTTCTGCAAAGGAACA	cgtATAATCGATGGTGGGTTCGTT
ETV6	cgaTCGACGCCACTTCATGTTCC	cgtCCACTGGGCTACGTCATCC	cgaCTCGAGCGCTCAGGATGGA	cgtGGCTGCAAGCGCAGGT
EVL	cgaCAGGGATTCAGCCGGATCA	cgtCTTCAGCCCTTTCACGATTGAA	cgaCACAACACTGCCAGCAACAC	cgtTAATTGATCACAACCTGCTGATCCTG
FAIM3	cgaTGCATATGCCAGTTCTTCCAA	cgtGCTTGTCACCTGCTACTGAA	cgaCAGAGTTACCACACCAGCTCAA	cgtGAGGGCGGTGGGTGATTT
FBXW7	cgaACGTTGCAGGGGCATACTAA	tcgGTGAATGCAATTCCCTGTCTCC	cgaTAGAGTCTATTCATTACAGTTTGATGGTA	cgtACATCCCAAACACGGATTGA
FCGR3A	cgaTCTAATTCCTGTGTAGCTTTGTTCA	cgtCCATCCCCACCTCATTGGAA	cgaCAATACTAAATGTACTACTGAGCTTC	cgtGACATGATGAAGGATTTGAAAGT
FUT4	acgCTACCACCAACTGAGCCAAC	tcgGTTCTCGAAAGCCAGGTAGAAC	cgaATGTGACCGTGGACGTGTT	cgtTTGTAGCGGGCCACTGT
GAPDH	cgaAGCCACATCGCTCAGACA	tcgTGATGGCAACAATATCCACTTTACC	cgaCCATGGGGAAGGTGAAGGT	cgtTGGTGACCAGGCGCCCAATA
GATA1	cgaATGCAGCAGCTTCCTCCA	tcgTGAGCAATGGGTACACCTGAA	cgaGCCCCGAGCACAGCCACCGCT	cgtGACTGGGGAGTGTCTGTAGGCCTCAGCGT
GATA2	cgaCCCTAAGCAGCGCAGCAA	cgtCCACAGGCATTGCACAGGTA	acgGGCTCGTTCCTGTTCAGA	cgtAGAGAGGGGTGGCTGTG
GATA3	cgaCAGACCACCACAACCACAC	cgtTCTGGATGCCTTCCTTCTTCA	cgaTCTGGAGGAGGAATGCCAAT	cgtGTCAGGGGTCTGTTAATATTGTGAA
GFI1	cgaAGCCTGGAGCAGCACAAA	cgtGCCGAGTGTCTGAGTGGATAA	cgaCCGTGCACTCGCAGGAA	cgtGGTGTGTGGACAGTGTGGAT
GYPA	cgaCGCACAAACGGGACACATA	cgtAATGATGGGCAAGTTGTACCC	cgaTGCAGCCACTCCTAGAG	tcgTTCCTCTTCTGGAGGGTAAA
GZMA	cgaAGTCTGCAATGATCGAAATCAC	tcgACAACAAAGGGCTTCCAGAA	acgTAATTTTAACCCTGTGATTGGAATGA	cgtCTCCATTGCACGAGTCTCT
HNF1A	cgaATCCTCAAAGAGCTGGAGAACC	cgtTGCTGCAGGTAGGACTTGAC	cgaGCCCTGAGGAGGCGG	cgtTTCGCCACACGCCACGGGTCCT
IGLL1	cgaCCCTCGGTCACTCTGTTCC	cgtGGGGTACCATCTGCCTTCC	cgaCTGAGGAGCTCCAAGCCAAC	cgtTCACCGTCAAGATTCCCGGATA
IKZF1	acgGAGGACAGCAAAGCTCCAA	cgtAATCCTCCGCACATTCTTCC	cgaTGACAGAGTCGTGGCCAGTAA	cgtTTTCACAGGCACGCCCATTC
IL3RA	cgaCGCATCCCTCACATGAAAGAC	cgtTTCTGCACGACCTGTACTTCA	cgaCATCGGTGACAGCTTCCAAA	cgtGTCACCAGACACTCCTCCA
IRF8	cgaCACGCTGGCAAGCAAGATTATA	cgtAGCGTAACCTCGTCTTCCAA	cgaTTTTAAGGCCTGGGCAGTT	cgtTGGCTGGTTCAGCTTTGT
ITGAM	cgaGCCCAGAACCAACAAAACC	cgtGTATTCTCTGAGGCCGTGAA	cgaGGAGCTGCCGGTGAAAT	tcgTGAGATATTTAGTGGAGACCCCAT
KLF1	cgaCCCTTCCCGGACACACA	cgtGGCTGGTCCTCAGACTTCA	cgaGGATGACTTCCTCAAGTGG	cgtTCCGTGGGGTCAGGA
KLRB1	cgaGTGGACATTCAACAGAGCAGGAATA	cgtCCAAGGGTTGACAGTGTGAGAA	acgGACCGGGTCTCTTAAACTG	cgtAATAACAAGCATTTCTCTCGGAGTTG
LCK	cgaGGGACATTCACCATCAAGTCA	tcgCGCTCCAGGTTCTGAATCAC	cgaGATGTGTGGTCTTTTGGGATCCT	cgtGGTTGGTCATCCCTGGGTAAG
LEF1	cgaCGAATGTCGTTGCTGAGTGTA	cgtGCTGTCTTTCTTTCCGTGCTA	cgaCTCTAAAAGAAAGTGCAGCTATCAACC	cgtCTGCTCTTCACGGGAGAGG
LMO2	cgaGCTCTGCCGGAGAGACTA	cgtGGCGCATTTGAAACATTCCA	cgaAAGACGGTCTCTGCGCATC	cgtTCTTTCACCCGCATTGTCATCT
LTB	cgaAGAGGAGGAGCCAGAAACA	cgtTCCCGCTCGTCAGAAAC	cgaTCCCAGCTGCCCACCT	tcgTCGTCGTCTCCCAGCCTAG
MAPK1	cgaGTGACCTCAAGCCTTCCAAC	tcgGGCCACATATTCTGTCAGGAAC	cgaTGCTGCTCAACACCACCTGT	cgtTGATCATGGTCTGGATCTGCAACA
MLL	cgaGACCATTGCCCATAGTCCAAC	cgtAGGAGCCAGAGGTTTGTGAA	cgaGAAAGTTCATCAAAAGAGAGTCAAAACA	cgtTGAGGAGGTCGGTCTGGT
MME	cgaAGGCCAGAGTATGCGGTTAA	cgtTGAATTCTTGCGGCAGTGAAA	cgaACAGTCCAGGCAATTTCAGG	cgtGGCTTCTGAAAACTCT
MPO	cgaTCCTTCGTCACTGGCGTCAA	cgtAGCGGAAGAACGGGATGCA	cgaGAGACCAGCTGCGTTCA	cgtGTCGGCTTGGTTCTTGATG
MYC	cgaCTGAGACAGATCAGCAACAACC	cgtGCTCCGTTTTAGCTCGTTCC	acgAAATGCACCAGCCCCAGGT	cgtTCCTCTGGCGCTCCAAGAC
MYD88	cgaTCCAGACCAAATTTGCACTCA	cgtGTCGCAGACAGTGATGAACC	cgaTCTCTCCAGGTGCCCATCAG	cgtTCAGGATGCTGGGGAACTCTTT
NCAM1	cgaGCTGCCAAGCTCCAATTACA	cgtAATGCGGTTCACTGCAGTAC	cgaCCCCTCTGCCAGCTAT	cgtAGTTGTAGTTCCCAAAATCATTC
NLK	cgaGTACTCTCTGCCCTTGACATAC	cgtGAGTGGTTGAGGAGAGACGATA	acgCCTCCACACATTGACTATTTTGAAGA	cgtTTATGTAGGTCACTCTGCATCAATTC
NOTCH1	acgACGGGGCTAACAAAGATATGCA	cgtTGATGTCCCGGTTGGCAAA	cgaGAACAACAGGGAGGAGACAC	cgtTGGTCCAGCAGCACCT
PASK	cgaGTTTTCCTCAGCCCACAGAC	cgtTGGGCAGCCAGTGATGATA	cgaACCTGAGCAGAAGGAATGGG	cgtAATAGGAGCTCCATCTGTCTTCAG
PAX5	cgaGGACAGGGCAGCTACTCA	cgtGGGTTGGGGAACCTCCA	cgaACCGACGCTGACAGGGAT	cgtGAGGAATACTGAGGGTGGCTGTA
PGK1	cgaTCTCATGGATGAGGTGGTGAA	cgtGTGCTCACATGGCTGACTTTA	cgaCACTTCTAGGGGCTGCATC	cgtTCCTCCGTGTTCCATTTGG
POLR2A	cgaTCCGGAGCTAAAGGTTCCA	tcgGATGAAGTGAGGCAGAGTCC	acgAGATTAACATCTCCCAGGTCATTGC	cgtGGTGCTTGAAGCCAAATGGAATC
PTPRC	cgaTTGGAGAAGTTAGTAAAACCGAATCTGAC	cgtCACTGTTGTCTTATCAGACGAGGAAC	cgaATCATCACCTAGCAGTTCATGCA	cgtAATTTCCTCCTCTGTTACCCTAAGAAC
RPL13A	cgaGTATGCTGCCCCACAAAACCA	cgtACCTTGAGGGCAGCAGGAA	acgGGCCAGGCCGCTCTGGACCGT	cgtCCACCATCCGCTTTTTCTTG
RPLP0	cgaTAAACCCTGCGTGGCAATCC	cgtTTGTCTGCTCCCACAATGAAAC	cgaGACGCACCGCCGTGAT	tcgTGGATGATCTTAAGGAAGTAGTTGGACT
RUNX1	cgaCGCAAGTCGCCACCTACC	cgtGCCGCTCGGAAAAGGACAA	cgaTGGATGGGCCCCGAGAAC	cgtCTCCCGGGCTTGGTCTGAT
SDC1	acgCCTTCACACTCCCCACACA	tcgCCACTACAGCCGTATTCTCC	cgaCCTTCTGCCACCGAGAG	tcgGGTTTCAAAGGTGAAGTCCTG
SF3B1	cgaCAGATTTGCTGGATACGTGACA	cgtTGCCACAGGGGCATGATA	cgaATTGCTGCAACTGAACTTGAAGATG	cgtTCTTCTGACCAAGCAAACTCGTAG
SPI1	acgACGCACGAGTATTACCCCTA	cgtGCTCTGGAGCTCCGTGAA	cgaCAGTGATGGGGAGAGCCATAG	tcgAGCTCTCGAACTCGCTGTG
SPOCK2	cgaGTTATACGGCTTTTGTCTTAACGAA	cgtCGGAGAGGGAGAGAGAATCA	cgaGCCACCCATTACGGTATGATGA	cgtGCCAGCAGGGGCTGTAA
STAT4	cgaAGGAGAAATGCAAATCCCCTAC	tcgTGGACTTGATTCCACTGAGACA	cgaGATGGCGTCAGCGGCTTT	cgtTCCCAGGCAGTGCTCAAGT
TCF3	cgaGCCCTGGGAGTTTGATCTCTTA	cgtCTATGCAGAACGCACAGTTCC	cgaGGGAACTTGCCTCTCCCTCTT	cgtAGAGGCTATGGGGCCACTG
THY1	cgaCAGCATCGCTCTCCTGCTA	cgtGGATGGGTGAACTGCTGGTA	cgaGTCTCCCGAGGGCAGAAG	cgtTCTCATGGCGGCAGTCC
TOP2B	cgaGCGATTATAACCCTGGCAGGAA	cgtAGAAGGTGGCTCAGTAGGGAA	cgaACATCCAAAACAACAAGCAAGA	cgtTCCACATCTGAATCCTGATCAA
TP53	cgaTCAGCATCTTATCCGAGTGGAA	tcgAGTTGTAGTGGATGGTGGTACA	cgaATTTGCGTGTGGAGTATTTGGA	cgtTCAGGCGGCTCATAGGG
TRAF5	cgaAACACCTGGCTGTATGTCCTGAA	cgtTGTGCTCCCGTAAGGCTGAA	cgaGCTGAGCAAGACTGTCCTTTT	cgtGCTCATGTTGCTGCAGGTT
TRIB2	cgaGGAACCTCTGGAGGGAGAC	cgtAGCAGACAGGCAAAAGCA	acgTTTTCGTGCCGTGCATCT	cgtGTAGCAGCTGATATCAAACACCT
USMG5	cgaGTCCAGAAAGTGATGCGCAATA	cgtAGACAATCAATGCAATGCTTCCA	acgGTTCACTGGTATTAAAAA	cgtTATGTGGCCAGTACA
VCAN	cgaCAGGGTGCCCATCTCACAA	tcgCCAACGGAAGTCATGCTCAAAC	acgGCATCCTGTCTCACGAAGAA	cgtATCTTGTCATTGAGGCCTATCC
VPREB3	cgaTGGAGCATATAGCCTTGCAGAA	cgtATCCAGCTGGGCCAGGAC	cgaCTGCCTCCCTGCCTCT	cgtTGGGAAACTGACAGGAAGGT
XBP1	cgaAGCTGGAACAGCAAGTGGTA	cgtATCCCCAAGCGCTGTCTTAA	cgaAACTTTTGCTAGAAAATCAGCTT	cgtCTCCTGGTTCTCAACTACAAG
YWHAZ	cgaTTGCCGCTGGTGATGACAA	cgtGGGCCAGACCCAGTCTGATA	acgGAAAGGGATTGTCGATCAGTCA	cgtGGATGTGTTGGTTGCATTTCC
ZAP70	cgaGAAGCGCGATAACCTCCTCA	tcgCTCCGTGCCCTGCTTCA	cgaGAACTTGGCTGCGGCAACTTT	cgtACCTTGATGGCCACGTCGAT
ZFPM1	acgGGCCCCAAGGAGCTGGAA	cgtTATGCGCCTCTGCCCATCC	cgaCAGGCCCACGGAGGAAGA	cgtTGCACCACCGGCTCCA
ZMYM3	acgAAGAGAAGCGAGCGCGTTA	tcgCCTCATCATTGGGGTCATCTACC	cgaGGAGAGCAGAACCTCCAAAA	cgtTCAGAATCCTCATCTGACACTG
	Gene expression assays are for Figure 4 and Supplemental Figure 7.

## Sheet: Gene expression 2
Table 6. Primer sequences for Biomark gene expression and mutation detection assays
	Preamp forward primer	Preamp reverse primer	Assay forward primer	Assay reverse primer
ACTB	cgaAAGGCCAACCGCGAGAA	cgtCATCACGATGCCAGTGGTAC	cgaATGACCCAGATCATGTTTGAGACC	cgtAGGGATAGCACAGCCTGGAT
ADNP	cgaGGGACCCATCACTTACGAAA	cgtTCACTATGGACATTGCGGAAA	cgaAACCAGGACTATCGGACAAAA	cgtGGCAGAGAAGAATTTTGAGGAAA
ADTRP	cgaGGCCTCACTCCTATCCATCAA	cgtACACAGGATACACCCAGGTAC	acgAGAAGACAGGACTCACCTTGCT	cgtCCGTCTCAAAGTAGAGCCATAGGA
ANKLE2	cgaTTACGTGGTGGACCTGTACC	cgtATCAAATGGTGTGACGAAAGCA	cgaCCCGACAAGATGGGCTATG	cgtCGTTGACTACATCTGCATTTCC
ANKRD12	cgaTGATTCCTCAAGCACCTCAGTA	cgtACAGTGAAGGTGGTGGTGTA	cgaATGACGAATATGTAACATTTAACGGATC	cgtGTGGGAATACAAATCTTGCTTAAGG
ARPC2	cgaACAACACCATCAACCTGATCC	tcgTCAGCACCTTGAGGAAGTCA	cgaACACGTTCCGGGACTACC	cgtGACGTTTTCGCCCGCATA
ARRDC3	cgaTCTCCCTCTATCCTCGACTGTA	tcgAGAGGAATGGTACCGATGACA	cgaTAATCCGCGTGGAATATTCACTAA	cgtGTGGCAAATTAAGAAATAAATCCATAGC
ATM	cgaTCCGCAAGATGGGATTATGGTGAA	cgtACTTCTCCCAAGCAGCTTCCA	cgaCTAGTTGTCAATTTGTTGCAGT	cgtACAGCCTCTAGAACTTCTTTT
ATP5G2	acgAACGACCGGAGATACTGACA	cgtCTGTGTCGATGTCCCTTGAA	acgTGAGAGCCTCAGCAGCTT	cgtATGGCGCTGGTTTGGAA
B2M	cgaTAGCTGTGCTCGCGCTAC	cgtTCGGATGGATGAAACCCAGAC	cgaTCTCTCTTTCTGGCCTGGA	cgtGACTTTCCATTCTCTGCTGGA
BCAP31	cgaGGGCCATGGAGCACTTCC	cgtCCTGCTGCGAAATGAGAGTCA	cgaGAAGCTTTTCCGTGCCCAGA	cgtGCGTCTAAGCAGGAAGGACAG
BIRC3	cgaCAGACAGCCCAGGAGATGAAA	cgtCCATTTCCACGGCAGCATTAA	cgaATGCAGAGTCATCAATTATCCATTTTG	cgtGAGTATTCATCATGATTGCATCTTCTG
BRD2	cgaCACTTGGCCTGCATGACTAC	cgtGCCGTACATCAGCAGCAA	cgaCATTAAGCACCCCATGGACCTC	cgtACTCCTGTGCATCCCGGTAA
CASP4	cgaGCACAATGGGCTCTATCTTCA	cgtCTTTGGCCCTTGGAGTTTCA	cgaTCACACAACTCATCACATGCT	cgtATGATTGCTGTACCTTCCGAAA
CCDC88A	cgaTCGCAGGAGGACATAGAACC	cgtGAGACCATCCCGCTCTTCA	acgCTCTTGAAAAATATGGCATTGCATC	cgtGTTCTATGATAGTCTCTGAATGTTCATC
CCR7	acgGACAACACCACAGTGGACTAC	cgtCAGTAGGCCCACGAAACAAA	cgaTGTTCGAGTCTTTGTGCTCCA	cgtTGATGGAGTACATGATAGGGAGGA
CCT7	cgaCCACCCAGTACTTTGCTGAC	cgtTGCTGACAGAGCATTCACAC	cgaTTCTGTGCTGGCCGAGTACC	cgtGAGCCTCCACAGGCCATCATT
CEP57	cgaTACGACGCTCCCCAAGTAA	cgtGCCTGAATCCTCTCAAGTTCC	cgaGCCTACACTTGCCTATCCAG	cgtTTGAAGATTCTTAAGAGCAGAAAATATGG
CLIC1	cgaTCCTGCTGTATGGCACTGAA	cgtCCCAGCTGTGTTGGACTCA	cgaTGCACACAGACACCAACA	cgtCTGCCAGCTTGGGGTAC
CORO1C	cgaTGAGAGTCATTGATCCCAGGAA	cgtTGAACCCAGTGGTGAAGACA	cgaTTGCTGAGAAGGAGAAAGCA	cgtTTGCCATCGGCCAGGA
CTSC	cgaCTCCTGCTGCTTCTCTCC	cgtGACATCGCGCTGGGAA	cgaGTGCGCTGCGACACAC	tcgTGGAGCCCACCTGGAAGA
DBI	cgaGAGGTTAGGCACCTTAAGACCAA	cgtTTGCCCGTGAAGTCCAACA	cgaTTCATCTATGGCCACTACAAACAAG	cgtTCCCGGGCCGTTCTGTA
DDX5	cgaTGCTACAGATGTGGCCTCCA	cgtGTACTGCGAGCAGTTCTTCCAA	acgGAGGGCTAGATGTGGAAGATG	cgtCCTCTGAGGAGTTAGGGTAGT
DFNA5	cgaAAGCAGCTGTTTATGACAGCCTAC	cgtCAAGTGGCACAGTGTGGGAA	cgaGTCAGTGCCCTCGCAGAAAT	cgtTGATCTGGAGTTTGCAGCAAGTG
DIS3	cgaGATGGTTGGCCCAGAAATTCCA	cgtCTGATGGGGAACATCGTGTTCAA	acgTATCCAAATGGACACT	cgtCAAAACTTCTGTTTCAG
ECI2	cgaCCCAAACCAGGTGTATTTGAC	cgtGGACTCAAACTGGACACCAA	cgaGATCAACAAGGCCAAATGGG	cgtGCCTGGCAGCTTCCTT
EEF1A1	cgaGTGTGTTCCTTTGGTCAACAC	cgtACCCTATTCTCCACCCAGAA	cgaCGAGACATTTAGGTGAAAGACATC	cgtCTCAAGAATTACATTTTCAAGAAGTTTCC
ESD	acgTTCACTCAGCTGGCTGCTA	cgtCCAGCACACTCACTTTCCC	cgaTTCCCTGCACCACACTCTG	cgtCACTGAGGAGCTGTCACCAG
EXOC2	acgTTTTCCAGTGGATCCCCAAA	cgtATTGGAGCAAATGCTGACAC	cgaCTATTTTTGGCCACTCC	cgtAGATTTGTATTTTCCAGGAT
FAM111A	acgTGGCTCCTTAGAACCTGGAA	cgtTCTGCATGCACGGCAATTA	cgaGCAGGATATTTTGATTGGAAGGA	cgtTTCACCAGTGCTTCTTTTAAATAGT
FAM65B	cgaCACGGAAGCACTCAGTCAA	cgtGGTCTCCTCTAGACTCCATCC	cgaTGTAATATGAAAATCGAGCAC	cgtTCATTAGAGAAGTACTGCAA
FCER2	cgaCAGAGCTGGGATGGAGAAGAAA	cgtTCTCACAGGTCACGCTACCTA	cgaTTCTGCCCCTGATAGTTGG	cgtAGGATGTGAGTTGCTAGCC
FIBP	cgaTCCGGGAGGAGGTGACAA	cgtGTGCCCTTGCCGAAGTAGTA	cgaGATGGAGTTGCAGGTGTCCAG	cgtGCACTTCCGTTGGAAATTGATCC
FLOT1	cgaCAAAACAGGCATCACCCTCAA	cgtAGAGGAGGAAGTGTTGCTGAA	acgGAGCTGCCGGAGACAGTT	cgtAGGGAGCCCCGCATTTC
GMPS	cgaAGAAGCCTTCCAGCTGTACC	cgtGCTGGACACCAGTGTGATCTTA	cgaCTCAGCTGGACATGCTGCTAG	cgtAAGGGACCACTGATCTCCTCTG
GNB2L1	cgaTCTGTTGAAGAGGCCCTCAAA	cgtTTTCCGTGGGGTTCTATCTTCA	cgaAAGCTTGGAATTCAGGTCAAAGT	cgtTGATATTGGTAGGGTTGTTGTTCC
GNL3	acgCTCCTGTGGCTGGGACAA	cgtAGGGATCCATCTGGAGAGACA	acgGCTGGTCAAGGTATGGAACC	cgtGTCACCGTGTTCAGATAGCC
GSTP1	cgaTGTTGGTGTATCCATGGGGCTTA	cgtGCAAGCGCAGAGGAGGAATTAA	cgaCAAGGAGCATGCAAGTTGTC	cgtAGATACGATGAAGCTCGGACT
HIST1H1E	cgaGGAGACCTCACCCTGTACCA	tcgCCTCCACGCCGTCATTCA	cgaTCCAATACCATCCTGCGTCAC	cgtACCAGGGCTGCCTCCT
HIVEP1	cgaCGGTGTCCGAGCTCATTACTA	cgtGCGGCTGTTGTTCTTCTCC	cgaAGCTGTTGCCGCCTCCA	cgtGGCTGCCAGCGCTTTCTT
HSD17B7	cgaATACAGATGTCCGCCCCTA	cgtGAGACGCCTAAATCCACACA	cgaTGCACTTACTGTAACTTCTCCTTTAAGA	tcgTTCTTGCTATGTGCCTTGGACT
HSP90AB1	acgGTGCGCGAAGATGCGAAA	cgtATGTTCCTGCACGCCAAAC	cgaGGTGGTTTTGATCACCGGGGCTA	cgtCCAGCAGCCGCTTGCAGAG
HSPA8	cgaGGACCAGAAACCCTGATGACA	cgtCCCTGAATTCCAACTGACCTTCTA	cgaCACCCAAGAGGAGTATGGAGAA	cgtAAGTGCTTGACTGCCAAGTG
IFITM2	cgaTGCAATGAACCCCACCAACA	tcgGCCAGCATCATTCACCACCATA	cgaTTTGATGCCAAACGTCTGA	cgtAAGGGCCAATGTTTCATATCA
IGHM	cgaAAGATGGTTGGCGACGTGAC	cgtGGCCTGGACGACCAACAC	cgaCCAGGCCTATGCCTCCA	cgtAATGGTCATGAAGATGCCCAAA
KIAA0226L	cgaATCTTCCCATTTCAGACAGCAA	cgtTTTTCTCCTCGCTGTGATCC	cgaAGAAGATGTTCAGCGTGCAGGGCTTGCT	cgtCACACCGGGGGCACTCGGAGGA
LCP1	acgGGATCAGTGTCCGATGAGGAAA	cgtCAAGCAAGCAGCCTTGAACA	cgaTGATGGAGCTCAGAGAAGCTTT	cgtGTCATTCAACTCATTGAAGCTGATGTAT
LITAF	acgGCGCCCATCCCCAATAACAA	cgtAGGACAGCTGACTCACGATCA	acgTCTACGTGCAGCACCCCAT	cgtTCTTGTTGCAGGAAGGACAACAC
LYST	cgaAGCAGTTCACCCTCCTACTAA	cgtTGCCTCAGGTACATGATTGAC	cgaGTTTGTCACAATCCCACGAACTT	cgtTTTCTCCTGAAAGATCTTGCCATCT
MALAT1	cgaAAGCTAGGACTGAGGAGCAA	cgtAAATCGTTAGCGCTCCTTCC	acgGCGAGCAAGCAGCAGTT	cgtTTCTTCCTAGCTTCCTTCACCAA
MAPRE2	cgaTCGACCCTCATCAGCCAAAA	cgtCGCCTTCAAGGGCAAGTTTTA	cgaCTTCTTCCAGTGGCTCAGCAT	cgtCATTAAGCTGTATGACCTGCGTTTC
MEF2C	cgaCCCAGTGGTTTCCGTAGCA	cgtAGAGATGACAGGTCTGCACTAC	acgCTCCTACTTTACCAGGACAAGG	cgtTCAGAGAGTACTCGGTACCATAT
MYL12B	cgaCCTGACCATGTTTGGTGAGA	tcgGGTTGTCAGCAGCTCTCTT	acgAGTTAAATGGCACAGATCCTGAAG	cgtTTCCTGAATGGTGCCTGTTG
NCOA6	cgaCTCCCGAACTGAAGAGCCAAC	tcgGGATTGCACCGCACTGGTTA	cgaGTGGCCTCTGAAAGTGTGGAAA	cgtTCTTTAGTAGAGCTGGAGGCTGAA
NFYC	cgaGCAGCAGATCATCACTAACACA	cgtTGGATCTGTCCCTGCACAA	acgTCCCGGTGCAGCTGAAT	cgtCCTGATACAGGCTGGGCTAA
NOP10	cgaCAACGAGCAGGGAGATCGA	cgtGGTGATTCGGTGTCGAGAGTAT	cgaTATACGCTGAAGAAATTTGACCCGATG	cgtAGAACCGAGCAGGATGGG
NSL1	cgaTCAGCATTAATGGGCAAGCA	cgtACTGCTTACGTTTTGTGGCTA	cgaGGCAGGAAGCTTCAGATAATTG	cgtTCTACTATGATTTCATCAAACTGATCTTC
NUP88	cgaCTGTGGGACGGAGAAGACA	cgtCAAACAGGGGTGGATTTATGCA	cgaTCCTTCTTAGTCGTTCGCCTTCG	cgtAAGCAATCTCTGGTACTGGGACAG
PA2G4	cgaATGCCCAATGGCCCCATG	tcgTTTTCGACTTGCAGAACTCTGGAG	cgaCGGATAACCAGTGGTCCCTTC	cgtAGGGCCTTTAGCTCTGCATC
PAX5	cgaAGTCTCCGGTGCCGAAC	cgtGTAGTGCTGCCTCTCAAACAC	acgTTCCGGGCAGAGACTTCC	cgtCGGTCCAGCACCTCCA
PCF11	cgaCATCTCAGTCAGGTGGATGTAA	cgtGGGAGGCTGAGCAGTTAC	cgaGTTTTCAAAATTGCTAAAAACAGG	cgtACTTACTTGTGTTGTAGCTGAA
PICALM	cgaGGCAGCATTAGAGGAAGAACA	cgtCTCCTGCTGAGGTGGATACA	cgaGAAAGCTTTAAAGGAACAGCGCCTA	cgtGAGAGGCTGCAGTTGTTAAAGAGG
POU2AF1	cgaTCCGCCACTCATCACCAA	tcgGGAGGTGGGTAGTGTGGAAA	cgaAAGAAGCTCCGCCACGCCCG	cgtGGGGCTGAGGCCACGGGAAAT
PSAP	cgaGCCTCCAAGAATGTCATCCC	cgtAGCTTGGTCACCTCCTTCA	cgaTGCCCTGGAACTGGTGGAG	cgtCCAGGAATTCACACACCTCACAG
PSMC4	cgaAGGAGGTGAAGCGAATCCAAA	cgtTGCTCAGGATGCGCACATA	cgaCATCCCGCTGGTCATCG	cgtATAGTTGGAGCCTGTGGTAGA
PTPN2	cgaGAGGCACAAAGGAGTTACATCTTA	cgtTTTCTCCACAATGCGGTTCA	cgaACACAGGGTCCACTTCCTAAC	cgtGCATGACAACTGCTTTGGTCT
ROCK1	cgaGCTAGACGTTGATCTGAAGCAA	cgtCGCTTATTTGATTCCTGCTCCA	acgTCTCAGCAGAAACTAGAACATTTG	cgtTTGCAGGGTTAGATTCTTAACTTC
SAR1B	cgaGCTGGCATGACGTTTACAAC	tcgTTCGTGGTCTGCACAATCC	cgaTTTTGATCTGGGTGGACATGTT	cgtATGCCATTGATAGCAGGAAGG
SARAF	cgaCCATTTTCCCACCGTTACCA	cgtAAGCACTGCCAAAACCAGAA	acgGAGATTCACCAACTCAGCAGGA	cgtGTTGCACCATGGCCAGTATTC
SCIMP	acgCCGAGGAATTGGCCTTCTCTA	cgtCAATGTAGCTTGGGATGGAAACA	cgaAAGACTCTTCCCCACAGG	cgtCTTTATTTACCAGTGAGTATGTAGC
SELL	cgaGACGCCTGCCACAAACTAA	cgtCACATCACAGTTGCAGGTGTA	cgaAGGCAGCCCTCTGTTAC	cgtTTGATGATTTCTACACATTCTCCAT
SERINC3	cgaCCTTTGCGTTGTGGCTTCTA	cgtGCTGACCAGGTGAGGTACATA	cgaTCGATCCACCCAAAAATTCAGGAAC	tcgAGAGGGTGATGAGGGAGGACT
SERPINB9	cgaAACAAGGCTGGCACACAGTA	cgtCCTTCAGCTCAGCATGGTAGAA	cgaCCTGCTGAGAACGGCCAAC	cgtTTGAAGACAGGATTCCTTAAACGTTGAG
SESN3	acgGGAGAAGAGCATTTGCCAAC	cgtGACCATCCGAAACTTTTCATCAA	cgaATTCCGAGCTCAGGACTATACCT	cgtGAATAAAGTCTGTTCACCAGGGAGA
SLC35F2	cgaTGGGACTAGCAGATGTGGAA	cgtACCATGACAGAGCCATCAAC	cgaCTAATTATGTGATCGTCAGAGCCTACC	cgtACAGGAATCCCAAAGCAATCCA
SNHG5	cgaCGTTCTGAGTGTGGACGAGTA	cgtCTTCCAAGACAATCTGGCCTCTA	cgaAAGATAATGAATGTCGAATGTGACTGACTA	cgtGCAGACAGCGACCCTCAT
SNX20	cgaACACACAGCCCTGGAGAC	cgtCAGTGGCTGGTGCTTCC	cgaTGGAGCCTTGGAGCATGG	cgtTTGCCGTGCACTGGGTTA
SP140	cgaGAGACCGCTCCTTCATCTCC	cgtAGCCAAATGTCTTCTCCAGTTCA	cgaGATGTATGAACATTTTCAAGAAGCT	cgtCTGAGTACACAATACATCACTCTT
SPOPL	cgaCAGCTGCCCCAAAAGTGAA	cgtCAGTCCTTCCCTTGCACAAA	cgaATTCAAATTTTCCCTTCTGA	cgtTCGATATGCTCTTTGGC
SRSF3	cgaGAAGTGTGTGGGTTGCTAGAA	cgtTCTTACACGGCAGCCACATA	cgaCACCCGGCTTTGCTTTTGTT	cgtTTCTTCCATCTAGCTCTCGGACT
SUGT1	cgaTGAAAAGTTGGAGGGAGATGCA	cgtAAAACTGTACCACCCGACTCC	cgaACAGATTATTTCAGCAGATCTATTCAGA	cgtTAAAGGATTTGTTCATGGCACGTT
TAF1D	cgaTGACATCTGATGCTGTGGAAC	cgtATTTTCGAATGGGGTTTCTTTTCTCC	cgaTTGCAAATCGAAGTGATAACTC	cgtCCTTTAGGTGAGTAAGGGATAC
TAPBP	cgaCTTTCAGGGCCCTCCCTTGA	tcgCTTTGAATCCTTGCAGGTGGACAG	acgGGACAGCGTAGGCCTTTT	cgtCAGCCCAGTGCCTTGAA
TBPL1	cgaAAGCTAAATTTGGTGCCAGAC	cgtGGATTTCAAATGGCATGTTACAC	cgaCTTAGCCCGTAGTCTGCAGAAA	cgtACTGCCAGAACGTTAACAACCT
TMBIM6	cgaGATCTTTACCTGCTTCACCCTCA	cgtAAAACATTCCCCAGGGAAGACA	cgaTCTATGCCAGGCGCCGTAG	cgtACAAGCTCAGGGCTGACATCAA
TP53	cgaTCAGCATCTTATCCGAGTGGAA	tcgAGTTGTAGTGGATGGTGGTACA	cgaGGAAATTTGCGTGTGGAGT	tcgAGGGCACCACCACACTAT
TPI1	cgaACGTGAAGGACTGGAGCAA	cgtCGTTGGACTTCAGCCATCC	acgGGTCGTCCTGGCCTATGA	cgtTCGGAGCTTCTCGTGTACTT
TRIM13	cgaAGCAAGATTCCCTGGAGCTTTTA	tcgTCCAAGTTGCCAGGTCATCAA	cgaTTTTGCTAATCCTTCTGCTTGG	cgtATAATGACCATTCTAGGAACATGGTA
TUBB	cgaAGCCATCCAGGAGCTCTTCA	cgtTCAGCCTCGGTGAACTCCA	cgaAGCGCATCTCGGAGCAGTT	tcgCCATGCCCTCGCCTGTGTA
UBB	acgAGTGCCCAGTGATGGCATT	cgtGCTACCATGCAACGAAACCTTT	cgaCTCTGCACTATAGCCATTTGC	cgtTTAACATTTTGAACAGGTTCAGCTA
UBC	cgaCTTAGAACCCCAGTATCAGCAGAA	cgtGAATCGCCGAGAAGGGACTA	cgaGGACATTTTAGGACGGGACTTGG	cgtTCGCCTGTTCCGCTCTCT
UBR5	cgaGGCTGGAGAAGAGGATCATCA	cgtTGCTAACAAGTCCAGCTCCA	cgaGGAAGAACACGGGGAAGAAAAT	cgtACTCCCGTCTTCATCATGCT
UCP2	cgaGCCACTGTGCCCTTACCA	cgtCAGCTGCTCATAGGTGACGAA	cgaGAGGGGCCCCGAGCCTTCTA	cgtTTCCAGGAACCCAAGCGGAGAAAG
USP22	cgaGTGTCTTCTTCGGCTGTTTCAC	cgtTGTAGTCCTGGCACAGAAAACA	cgaAAGAAGCATATTCACGAGC	cgtGTACATCAGATCAATGGCCAGGTTGTGCC
VPS36	cgaCATGGCCATTCTCCTTTCCC	cgtGAATGGGCCAGGTTCTTTGTTA	cgaATTGAAGAACAGGCGGCTGGA	cgtGGAGGAGCTGGGTGAAGATGA
ZC3H13	cgaAGATCAAGCAAGGGATTCTTCC	tcgTCAAGCTCGTCATTCCTTCC	cgaGACATGGAGAGCGAGACC	cgtTGATGTCGAATTGGTGAGCTT
	Gene expression assays are for Figure 5 and Supplemental Figure 5.

## Sheet: Mutation detection assay
Table 6. Primer sequences for Biomark gene expression and mutation detection assays
Gene Name	Sample Name	Preamp forward primer	Preamp reverse primer	Assay normal/allele 1 primer	Assay mutant/allele 2 primer	Assay constant primer
BIRC3	CLL005	cgtAGTGTCCTATTTGTAGGAGTACAATCAA	cgaAAATATGTTACACAAAACAATGTTTTTTGAGTTGTA	AAGGGTACAGTTCGTACATTTCTTTCATGAtctttaatAAACATCG	AAGGGTACAGTTCGTACATTTCTTTCATGAtctttaatAAACATCA	cgtAGGAAACCAAATTAGGATAAAAGTTAAAGTTATAATACA
CCDC90B	CLL005	acgGGAGAGAGTTCTTCACTACCACAA	acgCTGAACCAATGCATGGGTATCAA	TGGGTATCAAAAGTTAATTTCCTTTGTTCTAAAGGAcactcaatCTGGCC	TGGGTATCAAAAGTTAATTTCCTTTGTTCTAAAGGAcactcaatCTGGCT	acgCCACAACCAAGGAGGGATATGATA
CEP57	CLL005	cgaCAGCTGGAGAAACAGAAGTTAGAGAA	cgaCCTTTTTTCTCCAGGTCTCAGTTTCA	TGTGGTCCCTGTGATTCCAGAACccaatatactCTGTTTCT	TGTGGTCCCTGTGATTCCAGAACccaatatactCTGTTTCC	cgtGCAGAAGAAGGAATTAAAAGCTACCAA
FAM76B	CLL005	cgtGCCCAAATTGGAATCTAAGCCATCTAA	cgaGGTCTGGTCTCTCTGCTGTAA	AGCTCTATAAATCAGTCAGCAGATAGTGGGtcctaAAGTCAAT	AGCTCTATAAATCAGTCAGCAGATAGTGGGtcctaAAGTCAAC	acgTGTAAGAGACGCTTAAGTGACATCA
LCP1	CLL005	cgaGGCAATGGATACATCAGCTTCAA	cgtCTGATCCTTCCATCTTGGTCCA	AGGCTGCTTGCTTGCCTTTGaaatctccatTAGAGTAC	AGGCTGCTTGCTTGCCTTTGaaatctccatTAGAGTAT	cgtCCTGTAGCCATCAGGTTTTCTGTAA
PICALM	CLL005	acgAACCAAAGGTTGCACCAACAA	acgACACTTCCCATTTGTGGAGGAA	GGTGTAGTAGCAGGATAGGCCATTACAtctaatcTGTTGCA	GGTGTAGTAGCAGGATAGGCCATTACAtctaatcTGTTGCC	cgaCACCAACAACCGCTTGGAA
USP28	CLL005	cgaCATCACAGGACTACTCTACATCACAA	gcaCACGGGCTGTGTTTGCAA	CCTGGGCAGTTTGCTCCTTTACAtcattctCTCAGAC	CCTGGGCAGTTTGCTCCTTTACAtcattctCTCAGAT	tcgGCCTTCAGTAGCCTCTTCTCAT
ABT1	CLL146	cgtTCGGACGCGTCTTCTTTCA	cgtCTATGCGCTTGTCACGGAA	TCCCTCGGTGTAGTCCTTGGatctcctaaGCTTTTTT	TCCCTCGGTGTAGTCCTTGGatctcctaaGCTTTTTC	tcgCGCAAGAAGAAGGCAGCA
BIRC6	CLL146	cgaACTACATGTCTCAGGTGAAAAATGCTAA	cgaGCTCCTCATCACAGCGTACAA	ACACACTAGAGGATGAAGACAGAGGCttactcactctTTGAAAGC	ACACACTAGAGGATGAAGACAGAGGCttactcactctTTGAAAGT	cgaCAGGTGAAAAATGCTAATGATGCGAA
COX10	CLL146	cgaGTGGAAAGAGATGAAGCTGCAA	cgaTCCCAACAGAAGTAAGCAGGAA	GGAGCCAATGCAAATCCAGCTGatcattctaTTACAACC	GGAGCCAATGCAAATCCAGCTGatcattctaTTACAACT	cgaAGGAATTTTGGCTCGACTATCCAA
DGUOK	CLL146	cgtCAAGAAGACCTCATGAGAGAGGTAA	cgtAGGTGGTTGGGAGACACAA	CTAGCTTCAGAAAGTCAGGGAGCCatcactaCTGAACT	CTAGCTTCAGAAAGTCAGGGAGCCatcactaCTGAACA	cgtCCTTTGTAAAGAATCTGTAACCAATACCAT
ELP2	CLL146	cgaCACAGGTGACTTGGCATGAA	cgaCACAAAATTCCGAGGTGCAGAA	GGCCTCAGATACATGGGTATGACCactttccaaTGGCAAT	GGCCTCAGATACATGGGTATGACCactttccaaTGGCAAC	cgaCACAGGTGACTTGGCATGAA
EML4	CLL146	cgaGGTGAAACTCCACAGCCAA	cgaTGATGACTCCAATGAGCATATGCTTA	CACAGCCAAAACAACTTCATTTGTTGTCTTTAaccacGCTTTCT	CACAGCCAAAACAACTTCATTTGTTGTCTTTAaccacGCTTTCC	cgaGCTTACTGTATGGGACTGGCA
HIST1H1C	CLL146	agcAGTTTCTCTGGCTGCTCTGAA	cgtCCAGAGTGCCCTTGCTCA	CGCCGGCTATGATGTGGAGAtttttattCCGTATC	CGCCGGCTATGATGTGGAGAtttttattCCGTATT	agcACCAGGCTCTTGAGACCAA
HMGN4	CLL146	cgtAAGGGAGAGAAGCTTCCCAA	cgaGCTTTCTGGGACTGGAGTGTA	TGGAGTGTAGAGGCATCTCGGTaaccacattGGTTGTTC	TGGAGTGTAGAGGCATCTCGGTaaccacattGGTTGTTT	cgtGGGAAAGCAGATGCTGGAAA
KLHL14	CLL146	cgaCGGGTCCAGTCAGTGGAT	acgCTGCAGTGCTGCCTGAA	GTTCATGGCGTCCAGCAGCtcacaacaatGCAGACC	GTTCATGGCGTCCAGCAGCtcacaacaatGCAGACT	cgaCAGTCAGTGGATTTCATGCGAA
NUP88	CLL146	cgaCTTTGTTGAACACATCCTTTGTACGAA	cgaGGTCCCAGAATGTCAGGTACAA	CCTTTGTACGAAGCCATTGCCCacatctacatctCAGCCA	CCTTTGTACGAAGCCATTGCCCacatctacatctCAGCCT	cgaTCAGGTACAATCCAAAATCCTCGAA
PLEK	CLL146	acgGAAGATTTTTAATCACTGCTTCACAGGTAA	cgaCATTGAGCAGCGATGAAGCAA	GCGTCATTGATTGGCTGGTATCCAtaatactcTAGGAATC	GCGTCATTGATTGGCTGGTATCCAtaatactcTAGGAATT	tcgGATGAAGCAATCATGAGGCCTT
PSMG2	CLL146	acgGAAAAACTGCTTTCCTGGGTGAA	cgtCCGGAAGGGAGTACTACGAA	CGAAGCTGCAGATCATTACGCTGtctacttacACTGCTT	CGAAGCTGCAGATCATTACGCTGtctacttacACTGCTC	cgaGCTGTGCCAGAGTCATTGTTCTT
RABEP1	CLL146	acgTGCTAAGGCTACCGTTGAACAA	cgaCCGCTCTAACTGCACCTGAA	ACTGCACCTGAAGGGTCTGTGtttcaacctCAAAATCC	ACTGCACCTGAAGGGTCTGTGtttcaacctCAAAATCT	cgaAGACAGAATTAGATGTCAGTGAGCAA
RNMT	CLL146	cgtTGGCAAATTCTGCAAAAGCAGAA	cgaAGAAAGCCCAGTCCCAGAA	TCTGCAAAAGCAGAAGAATATGAAAAGATGTCTaaactcttatGGCAAAAG	TCTGCAAAAGCAGAAGAATATGAAAAGATGTCTaaactcttatGGCAAAAC	cgaTGAATGAAGACTCTGTTTCAGAATTCACT
SEH1L	CLL146	cgtGGTAATGGGAGCCCAGTCAA	cgaGTGCTTTCTGCCAGCAGAA	GAGTTCTCAGCAGGGAACCTCAttaaatGGTTCAAC	GAGTTCTCAGCAGGGAACCTCAttaaatGGTTCAAA	acgTCTGCCAGCAGAAGATCCAT
SERPINF1	CLL146	cgaCCCAGACATCCATGGTACCTATAA	acgCTTTTCCAGAGGTGCCACAA	CAAAGACGATCCGGGAGGCAacacaaTTCTGGG	CAAAGACGATCCGGGAGGCAacacaaTTCTGGC	cgaGAGCTCCTTGACACGGTCA
TRIM38	CLL146	cgtAGCTCCAGAAAGCTGTGACAA	cgaTCAGACCGGATTTTTTGTCTCTGAA	GAAGACAGATGTACGGAGCAGAAGCaccaatatatGCAATGC	GAAGACAGATGTACGGAGCAGAAGCaccaatatatGCAATGT	acgTGAATCTGTACCTTCTCTTTCCATTTAGTTA
TVP23B	CLL146	cgaGCCCAAAAGTCACACGACAA	cgaCCACTTATTCTTTCGAGTCAGTGCAA	CGACAACAACAAGATAATTGTCACCATACAGGctactAGCAACC	CGACAACAACAAGATAATTGTCACCATACAGGctactAGCAACT	cgaCGAGTCAGTGCAATCATCGTCTA
UBB	CLL146	tcgGGCTCATCTTTGCAGGCAA	acgCGGTCAGGGTCTTCACGAA	AGCTGGAAGATGGCCGTACTCcacaactaaACAACATC	AGCTGGAAGATGGCCGTACTCcacaactaaACAACATT	gcaGTGCAGGGTCGACTCCTT
WNK1	CLL146	cgaGGCACTCCGAGTAAGGATATTCA	tcgGTGATAGGTACCCCAGAGTTCA	CCATCTCAAGCATGCACATCCCtttctttCGTCAAC	CCATCTCAAGCATGCACATCCCtttctttCGTCAAA	gcaCCCCTGAGATGTATGAGGAGAAA
ZKSCAN8	CLL146	tcgGGTGAGACCAGGAGTGAGAA	acgCTTCATGCTCAAGACCCCTGATAA	CCCGTTGCATTTGGCAGCTtaacaaacaaATGTGGC	CCCGTTGCATTTGGCAGCTtaacaaacaaATGTGGT	cgaAGCTTCAAAACAGGTAATATCTACTGGAA
